# Supplementary material for: Bioinformatics and Machine Learning Methods to Identify FN1 as a Novel Biomarker of Aortic Valve Calcification
Source: Front Cardiovasc Med. 2022 Feb 28;9:832591. doi: 10.3389/fcvm.2022.832591 (PMC8918776; doi:10.3389/fcvm.2022.832591)
Supplement: Supplementary file 4 [file Table_4.XLSX]

## Sheet: Sheet1
Supplement File4. Gene Ontology (GO), Kyoto Encyclopedia of Genes and Genomes (KEGG) and Disease Ontology(DO) enrichment analysis results of DEGs.
Functional enrichment	ONTOLOGY	ID	Description	GeneRatio	BgRatio	pvalue	p.adjust	qvalue	geneID	Count
GO	BP	GO:0060326	cell chemotaxis	33/301	306/18862	3.7523e-18	6.68204e-15	5.16654e-15	CXCL16/SCG2/CXCL12/PPBP/S100A9/SLAMF8/CCL19/RAC2/C5AR1/S100A8/FCER1G/CXCL5/VCAM1/KIT/CCL18/CCL8/CCL11/LPAR1/CXCL8/CORO1A/GREM1/GPR183/CXCL13/CCL5/PLA2G7/CXCL1/CCL4/CXCR4/FGF2/CCR1/CCR5/SYK/BIN2	33
	BP	GO:0030595	leukocyte chemotaxis	29/301	226/18862	3.8985e-18	6.68204e-15	5.16654e-15	CXCL16/SCG2/CXCL12/PPBP/S100A9/SLAMF8/CCL19/RAC2/C5AR1/S100A8/FCER1G/CXCL5/KIT/CCL18/CCL8/CCL11/CXCL8/CORO1A/GREM1/GPR183/CXCL13/CCL5/PLA2G7/CXCL1/CCL4/CXCR4/CCR1/CCR5/SYK	29
	BP	GO:0030198	extracellular matrix organization	36/301	393/18862	2.14e-17	1.87398e-14	1.44896e-14	FN1/LUM/COL4A4/TNC/MMP12/SPP1/VWF/MMP9/IBSP/COL5A2/CTSG/ANGPTL7/COL11A1/VCAM1/COL4A1/COL5A1/NDNF/CMA1/MMP1/COL4A2/SULF1/TGFBI/SFRP2/COL10A1/GREM1/TNFRSF11B/ITGA4/VIT/MMP13/ADAMTS5/TPSAB1/FGF2/SOX9/COMP/CTSS/FAP	36
	BP	GO:0043062	extracellular structure organization	36/301	394/18862	2.32247e-17	1.87398e-14	1.44896e-14	FN1/LUM/COL4A4/TNC/MMP12/SPP1/VWF/MMP9/IBSP/COL5A2/CTSG/ANGPTL7/COL11A1/VCAM1/COL4A1/COL5A1/NDNF/CMA1/MMP1/COL4A2/SULF1/TGFBI/SFRP2/COL10A1/GREM1/TNFRSF11B/ITGA4/VIT/MMP13/ADAMTS5/TPSAB1/FGF2/SOX9/COMP/CTSS/FAP	36
	BP	GO:0045229	external encapsulating structure organization	36/301	396/18862	2.73334e-17	1.87398e-14	1.44896e-14	FN1/LUM/COL4A4/TNC/MMP12/SPP1/VWF/MMP9/IBSP/COL5A2/CTSG/ANGPTL7/COL11A1/VCAM1/COL4A1/COL5A1/NDNF/CMA1/MMP1/COL4A2/SULF1/TGFBI/SFRP2/COL10A1/GREM1/TNFRSF11B/ITGA4/VIT/MMP13/ADAMTS5/TPSAB1/FGF2/SOX9/COMP/CTSS/FAP	36
	BP	GO:0042119	neutrophil activation	39/301	500/18862	2.19838e-16	1.25601e-13	9.71143e-14	PLAUR/PPBP/S100A9/CD93/CTSB/MMP9/C5AR1/S100A8/FCER1G/PLAU/CTSG/GMFG/CHI3L1/SLPI/FCGR3B/SERPINA1/GPR84/RNASE2/PLAC8/CXCL8/TNFAIP6/ANXA3/CLEC5A/FCN1/CCL5/AMPD3/LYZ/MNDA/CXCL1/TYROBP/LILRB2/PTPRB/CTSC/TLR2/CD14/HPSE/CTSS/SYK/BIN2	39
	BP	GO:0043312	neutrophil degranulation	37/301	485/18862	2.78667e-15	1.36467e-12	1.05516e-12	PLAUR/PPBP/S100A9/CD93/CTSB/MMP9/C5AR1/S100A8/FCER1G/PLAU/CTSG/GMFG/CHI3L1/SLPI/FCGR3B/SERPINA1/GPR84/RNASE2/PLAC8/TNFAIP6/ANXA3/CLEC5A/FCN1/AMPD3/LYZ/MNDA/CXCL1/TYROBP/LILRB2/PTPRB/CTSC/TLR2/CD14/HPSE/CTSS/SYK/BIN2	37
	BP	GO:0002283	neutrophil activation involved in immune response	37/301	488/18862	3.38681e-15	1.45125e-12	1.1221e-12	PLAUR/PPBP/S100A9/CD93/CTSB/MMP9/C5AR1/S100A8/FCER1G/PLAU/CTSG/GMFG/CHI3L1/SLPI/FCGR3B/SERPINA1/GPR84/RNASE2/PLAC8/TNFAIP6/ANXA3/CLEC5A/FCN1/AMPD3/LYZ/MNDA/CXCL1/TYROBP/LILRB2/PTPRB/CTSC/TLR2/CD14/HPSE/CTSS/SYK/BIN2	37
	BP	GO:0002446	neutrophil mediated immunity	37/301	499/18862	6.83616e-15	2.60382e-12	2.01327e-12	PLAUR/PPBP/S100A9/CD93/CTSB/MMP9/C5AR1/S100A8/FCER1G/PLAU/CTSG/GMFG/CHI3L1/SLPI/FCGR3B/SERPINA1/GPR84/RNASE2/PLAC8/TNFAIP6/ANXA3/CLEC5A/FCN1/AMPD3/LYZ/MNDA/CXCL1/TYROBP/LILRB2/PTPRB/CTSC/TLR2/CD14/HPSE/CTSS/SYK/BIN2	37
	BP	GO:0097529	myeloid leukocyte migration	25/301	218/18862	1.23912e-14	4.24771e-12	3.28432e-12	SCG2/CXCL12/PPBP/S100A9/SLAMF8/CCL19/RAC2/C5AR1/S100A8/FCER1G/CXCL5/KIT/CCL18/CCL8/CCL11/CXCL8/TREM2/GREM1/CXCL13/CCL5/PLA2G7/CXCL1/CCL4/CCR1/SYK	25
	BP	GO:0030593	neutrophil chemotaxis	17/301	103/18862	6.00834e-13	1.74807e-10	1.35161e-10	PPBP/S100A9/CCL19/RAC2/C5AR1/S100A8/FCER1G/CXCL5/CCL18/CCL8/CCL11/CXCL8/CXCL13/CCL5/CXCL1/CCL4/SYK	17
	BP	GO:0070098	chemokine-mediated signaling pathway	16/301	88/18862	6.11928e-13	1.74807e-10	1.35161e-10	CXCL12/PPBP/CCL19/CXCL5/CCL18/CCL8/CCL11/CXCL8/TREM2/CXCL13/CCL5/CXCL1/CCL4/CXCR4/CCR1/CCR5	16
	BP	GO:1990266	neutrophil migration	18/301	123/18862	1.05285e-12	2.77629e-10	2.14662e-10	PPBP/S100A9/SLAMF8/CCL19/RAC2/C5AR1/S100A8/FCER1G/CXCL5/CCL18/CCL8/CCL11/CXCL8/CXCL13/CCL5/CXCL1/CCL4/SYK	18
	BP	GO:0071621	granulocyte chemotaxis	18/301	124/18862	1.2141e-12	2.97281e-10	2.29857e-10	SCG2/PPBP/S100A9/CCL19/RAC2/C5AR1/S100A8/FCER1G/CXCL5/CCL18/CCL8/CCL11/CXCL8/CXCL13/CCL5/CXCL1/CCL4/SYK	18
	BP	GO:0097530	granulocyte migration	19/301	148/18862	2.70087e-12	5.94151e-10	4.59397e-10	SCG2/PPBP/S100A9/SLAMF8/CCL19/RAC2/C5AR1/S100A8/FCER1G/CXCL5/CCL18/CCL8/CCL11/CXCL8/CXCL13/CCL5/CXCL1/CCL4/SYK	19
	BP	GO:1990868	response to chemokine	16/301	97/18862	2.94649e-12	5.94151e-10	4.59397e-10	CXCL12/PPBP/CCL19/CXCL5/CCL18/CCL8/CCL11/CXCL8/TREM2/CXCL13/CCL5/CXCL1/CCL4/CXCR4/CCR1/CCR5	16
	BP	GO:1990869	cellular response to chemokine	16/301	97/18862	2.94649e-12	5.94151e-10	4.59397e-10	CXCL12/PPBP/CCL19/CXCL5/CCL18/CCL8/CCL11/CXCL8/TREM2/CXCL13/CCL5/CXCL1/CCL4/CXCR4/CCR1/CCR5	16
	BP	GO:0042742	defense response to bacterium	25/301	344/18862	3.14238e-10	5.98448e-08	4.62719e-08	PPBP/S100A9/SLAMF8/C5AR1/S100A8/FCER1G/CTSG/COCH/IGLC1/IGKC/SLPI/RNASE6/IGHM/TRBC1/PLAC8/TREM2/ANXA3/IGHD/CXCL13/LYZ/IL7R/ADAMTS5/TLR2/SYK/IGLL5	25
	BP	GO:0006959	humoral immune response	26/301	380/18862	5.04595e-10	9.10396e-08	7.03917e-08	PPBP/S100A9/TREM1/C5AR1/S100A8/CXCL5/CTSG/IGLC1/C6/IGKC/SLPI/RNASE6/IGHM/IGLV1-44/TRBC1/ITLN1/CXCL8/TREM2/GPR183/IGHD/CXCL13/FCN1/C7/LYZ/CXCL1/IGLL5	26
	BP	GO:0050867	positive regulation of cell activation	27/301	412/18862	5.9916e-10	1.02696e-07	7.94045e-08	CCL19/THY1/VCAM1/IGLC1/IGKC/IGHM/TRBC1/TREM2/CD2/CORO1A/GPR183/IGHD/HLA-DPA1/CCL5/IL7R/CD27/HLA-DRA/TYROBP/LILRB2/TAC1/HLA-DMB/IGFBP2/CTSC/RPS6KA1/LCK/SYK/IGLL5	27
	BP	GO:0002696	positive regulation of leukocyte activation	26/301	401/18862	1.58581e-09	2.53402e-07	1.9593e-07	CCL19/THY1/VCAM1/IGLC1/IGKC/IGHM/TRBC1/TREM2/CD2/CORO1A/GPR183/IGHD/HLA-DPA1/CCL5/IL7R/CD27/HLA-DRA/TYROBP/LILRB2/TAC1/HLA-DMB/IGFBP2/CTSC/LCK/SYK/IGLL5	26
	BP	GO:0071674	mononuclear cell migration	18/301	190/18862	1.62627e-09	2.53402e-07	1.9593e-07	CXCL16/CXCL12/SLAMF8/CCL19/C5AR1/CCL18/CCL8/CCL11/GREM1/GPR183/ITGA4/CXCL13/CCL5/PLA2G7/CCL4/CXCR4/CCR1/CCR5	18
	BP	GO:0032496	response to lipopolysaccharide	23/301	326/18862	2.92152e-09	4.35433e-07	3.36677e-07	PPBP/S100A9/C5AR1/HCK/S100A8/CXCL5/CTSG/VCAM1/SLPI/LY86/CXCL8/TIMP4/TREM2/GJB2/CXCL13/CCL5/CXCL1/LILRB2/TAC1/CCR5/TLR2/CD14/LY96	23
	BP	GO:0002687	positive regulation of leukocyte migration	15/301	133/18862	3.5035e-09	4.98878e-07	3.85732e-07	CXCL12/CCL19/RAC2/C5AR1/THY1/CCL8/CXCL8/TREM2/PLVAP/ITGA4/CXCL13/CCL5/PLA2G7/CCL4/CCR1	15
	BP	GO:0050920	regulation of chemotaxis	19/301	224/18862	3.63826e-09	4.98878e-07	3.85732e-07	SCG2/CXCL12/SLAMF8/CCL19/RAC2/C5AR1/LPAR1/CXCL8/TREM2/GREM1/GPR183/CXCL13/CCL5/PLA2G7/CCL4/CXCR4/FGF2/CCR1/TUBB2B	19
	BP	GO:0002685	regulation of leukocyte migration	18/301	205/18862	5.48258e-09	7.22857e-07	5.58913e-07	CXCL12/SLAMF8/CCL19/RAC2/C5AR1/THY1/HMOX1/CCL8/CXCL8/TREM2/PLVAP/GREM1/ITGA4/CXCL13/CCL5/PLA2G7/CCL4/CCR1	18
	BP	GO:0050921	positive regulation of chemotaxis	15/301	139/18862	6.4657e-09	8.06567e-07	6.23637e-07	SCG2/CXCL12/CCL19/RAC2/C5AR1/LPAR1/CXCL8/TREM2/CXCL13/CCL5/PLA2G7/CCL4/CXCR4/FGF2/CCR1	15
	BP	GO:0070661	leukocyte proliferation	22/301	312/18862	6.58806e-09	8.06567e-07	6.23637e-07	CCL19/RAC2/VCAM1/KIT/CCL8/CLEC4G/TREM2/CORO1A/GREM1/GPR183/HLA-DPA1/CCL5/MNDA/IL7R/RASGRP1/MZB1/TYROBP/LILRB2/TAC1/HLA-DMB/IGFBP2/SYK	22
	BP	GO:0002237	response to molecule of bacterial origin	23/301	346/18862	9.04158e-09	1.06878e-06	8.26378e-07	PPBP/S100A9/C5AR1/HCK/S100A8/CXCL5/CTSG/VCAM1/SLPI/LY86/CXCL8/TIMP4/TREM2/GJB2/CXCL13/CCL5/CXCL1/LILRB2/TAC1/CCR5/TLR2/CD14/LY96	23
	BP	GO:0001819	positive regulation of cytokine production	26/301	437/18862	9.49601e-09	1.07634e-06	8.32224e-07	LUM/MMP12/CCL19/LAPTM5/C5AR1/FCER1G/ADRA2A/HMOX1/SULF1/TREM2/CD2/TLR8/IGHD/HLA-DPA1/FCN1/ADIPOQ/MNDA/RASGRP1/TYROBP/LILRB2/TLR2/CD14/HPSE/IL17D/SYK/LY96	26
	BP	GO:0002548	monocyte chemotaxis	11/301	68/18862	9.73352e-09	1.07634e-06	8.32224e-07	CXCL12/SLAMF8/CCL19/CCL18/CCL8/CCL11/GREM1/CCL5/PLA2G7/CCL4/CCR1	11
	BP	GO:0051251	positive regulation of lymphocyte activation	23/301	356/18862	1.54134e-08	1.65116e-06	1.27667e-06	CCL19/THY1/VCAM1/IGLC1/IGKC/IGHM/TRBC1/CORO1A/GPR183/IGHD/HLA-DPA1/CCL5/IL7R/CD27/HLA-DRA/TYROBP/LILRB2/TAC1/HLA-DMB/IGFBP2/LCK/SYK/IGLL5	23
	BP	GO:0007159	leukocyte cell-cell adhesion	23/301	366/18862	2.57714e-08	2.67711e-06	2.06994e-06	CXCL12/S100A9/CCL19/RAC2/LAPTM5/S100A8/THY1/VCAM1/KLF4/CLEC4G/CORO1A/NRARP/ITGA4/HLA-DPA1/CCL5/IL7R/CD27/HLA-DRA/LILRB2/HLA-DMB/IGFBP2/LCK/SYK	23
	BP	GO:0070371	ERK1 and ERK2 cascade	21/301	320/18862	5.08042e-08	5.12226e-06	3.96053e-06	FN1/CCL19/C5AR1/CHI3L1/KLF4/CCL18/APELA/CCL8/CCL11/TREM2/GPR183/CCL5/NDRG2/ADIPOQ/RASGRP1/CCL4/FAM83D/FGF2/CCR1/SOX9/SYK	21
	BP	GO:0002407	dendritic cell chemotaxis	7/301	24/18862	6.74125e-08	6.44754e-06	4.98523e-06	SLAMF8/CCL19/GPR183/CCL5/CXCR4/CCR1/CCR5	7
	BP	GO:0070663	regulation of leukocyte proliferation	18/301	241/18862	6.77105e-08	6.44754e-06	4.98523e-06	CCL19/RAC2/VCAM1/CCL8/CLEC4G/CORO1A/GREM1/GPR183/HLA-DPA1/CCL5/MNDA/MZB1/TYROBP/LILRB2/TAC1/HLA-DMB/IGFBP2/SYK	18
	BP	GO:0070372	regulation of ERK1 and ERK2 cascade	20/301	301/18862	8.70227e-08	8.06254e-06	6.23394e-06	FN1/CCL19/C5AR1/CHI3L1/KLF4/CCL18/APELA/CCL8/CCL11/TREM2/GPR183/CCL5/NDRG2/ADIPOQ/RASGRP1/CCL4/FAM83D/FGF2/CCR1/SYK	20
	BP	GO:0045785	positive regulation of cell adhesion	24/301	425/18862	9.59912e-08	8.65942e-06	6.69545e-06	FN1/CXCL12/PLAUR/CCL19/IBSP/THY1/VCAM1/NDNF/MYOC/SFRP2/CORO1A/ITGA4/CXCL13/HLA-DPA1/CCL5/VIT/IL7R/CD27/HLA-DRA/LILRB2/HLA-DMB/IGFBP2/LCK/SYK	24
	BP	GO:0042110	T cell activation	25/301	474/18862	1.89435e-07	1.66509e-05	1.28745e-05	CCL19/RAC2/LAPTM5/FCER1G/THY1/VCAM1/KIT/CLEC4G/CD2/CORO1A/NRARP/GPR183/HLA-DPA1/CCL5/IL7R/CD27/HLA-DRA/CD3D/RASGRP1/LILRB2/HLA-DMB/IGFBP2/ITK/LCK/SYK	25
	BP	GO:0006909	phagocytosis	22/301	381/18862	2.28356e-07	1.95701e-05	1.51316e-05	CD93/RAC2/HCK/FCER1G/XKR4/IGLC1/IGKC/IGHM/IGLV1-44/TRBC1/TREM2/CORO1A/ANXA3/IGHD/FCN1/ADIPOQ/TYROBP/TLR2/CD14/SYK/IGLL5/BIN2	22
	BP	GO:0036336	dendritic cell migration	7/301	29/18862	2.83888e-07	2.37358e-05	1.83525e-05	SLAMF8/CCL19/GPR183/CCL5/CXCR4/CCR1/CCR5	7
	BP	GO:0042113	B cell activation	20/301	326/18862	3.15366e-07	2.57399e-05	1.9902e-05	ITM2A/SLAMF8/LAPTM5/VCAM1/IGLC1/KIT/IGKC/IGHM/TRBC1/GPR183/IGHD/ITGA4/MNDA/IL7R/CD27/RASGRP1/MZB1/TYROBP/SYK/IGLL5	20
	BP	GO:0002544	chronic inflammatory response	6/301	19/18862	3.57942e-07	2.85354e-05	2.20636e-05	S100A9/S100A8/VCAM1/CCL11/CXCL13/CCL5	6
	BP	GO:1903037	regulation of leukocyte cell-cell adhesion	20/301	330/18862	3.82836e-07	2.98264e-05	2.30617e-05	CXCL12/CCL19/LAPTM5/THY1/VCAM1/KLF4/CLEC4G/CORO1A/NRARP/ITGA4/HLA-DPA1/CCL5/IL7R/CD27/HLA-DRA/LILRB2/HLA-DMB/IGFBP2/LCK/SYK	20
	BP	GO:0034113	heterotypic cell-cell adhesion	9/301	60/18862	4.31355e-07	3.28596e-05	2.5407e-05	THY1/VCAM1/KLF4/PKP2/CD2/ITGA4/ADIPOQ/LILRB2/LCK	9
	BP	GO:0002688	regulation of leukocyte chemotaxis	12/301	119/18862	4.54111e-07	3.38411e-05	2.61659e-05	CXCL12/SLAMF8/CCL19/RAC2/C5AR1/CXCL8/GREM1/CXCL13/CCL5/PLA2G7/CCL4/CCR1	12
	BP	GO:0019730	antimicrobial humoral response	13/301	142/18862	4.64515e-07	3.38799e-05	2.61959e-05	PPBP/S100A9/S100A8/CXCL5/CTSG/SLPI/RNASE6/IGHM/ITLN1/CXCL8/CXCL13/LYZ/CXCL1	13
	BP	GO:0072507	divalent inorganic cation homeostasis	25/301	499/18862	4.94387e-07	3.53075e-05	2.72997e-05	CXCL12/S100A9/ATP1A2/CCL19/C5AR1/S100A8/CD52/THY1/ATP1B1/FAM20A/CCL8/CCL11/LPAR1/CEMIP/CORO1A/CXCL13/CCL5/STC1/CXCR4/FGF2/CCR1/TAC1/CCR5/GNA15/LCK	25
	BP	GO:0001503	ossification	22/301	401/18862	5.45039e-07	3.81305e-05	2.94825e-05	FHL2/TNC/SPP1/MMP9/IBSP/COL5A2/CTHRC1/COL11A1/IGSF10/TMEM119/MYOC/SFRP2/CHRDL1/CHRDL2/ACP5/CLEC5A/GREM1/STC1/CCR1/TAC1/SOX9/COMP	22
	BP	GO:0050670	regulation of lymphocyte proliferation	16/301	221/18862	5.58336e-07	3.82795e-05	2.95977e-05	CCL19/RAC2/VCAM1/CLEC4G/CORO1A/GPR183/HLA-DPA1/CCL5/MNDA/MZB1/TYROBP/LILRB2/TAC1/HLA-DMB/IGFBP2/SYK	16
	BP	GO:0022407	regulation of cell-cell adhesion	23/301	437/18862	6.17293e-07	4.0768e-05	3.15218e-05	CXCL12/PLAUR/CCL19/LAPTM5/THY1/VCAM1/KLF4/CLEC4G/CORO1A/NRARP/ITGA4/CXCL13/HLA-DPA1/CCL5/ADIPOQ/IL7R/CD27/HLA-DRA/LILRB2/HLA-DMB/IGFBP2/LCK/SYK	23
	BP	GO:0032944	regulation of mononuclear cell proliferation	16/301	223/18862	6.29926e-07	4.0768e-05	3.15218e-05	CCL19/RAC2/VCAM1/CLEC4G/CORO1A/GPR183/HLA-DPA1/CCL5/MNDA/MZB1/TYROBP/LILRB2/TAC1/HLA-DMB/IGFBP2/SYK	16
	BP	GO:0022617	extracellular matrix disassembly	10/301	81/18862	6.37378e-07	4.0768e-05	3.15218e-05	MMP12/MMP9/CTSG/CMA1/MMP1/MMP13/ADAMTS5/TPSAB1/CTSS/FAP	10
	BP	GO:1901342	regulation of vasculature development	20/301	341/18862	6.42202e-07	4.0768e-05	3.15218e-05	C5AR1/THBS2/ANGPTL7/CHI3L1/HMOX1/KLF4/ID1/CMA1/COL4A2/SULF1/APELA/CCL11/SFRP2/CXCL8/ANXA3/GREM1/CXCL13/ENPP2/CXCR4/FGF2	20
	BP	GO:0046651	lymphocyte proliferation	18/301	282/18862	7.0072e-07	4.36739e-05	3.37687e-05	CCL19/RAC2/VCAM1/CLEC4G/CORO1A/GPR183/HLA-DPA1/CCL5/MNDA/IL7R/RASGRP1/MZB1/TYROBP/LILRB2/TAC1/HLA-DMB/IGFBP2/SYK	18
	BP	GO:0048247	lymphocyte chemotaxis	9/301	64/18862	7.59957e-07	4.65202e-05	3.59694e-05	CXCL16/CCL19/CCL18/CCL8/CCL11/GPR183/CXCL13/CCL5/CCL4	9
	BP	GO:0032943	mononuclear cell proliferation	18/301	285/18862	8.16922e-07	4.913e-05	3.79872e-05	CCL19/RAC2/VCAM1/CLEC4G/CORO1A/GPR183/HLA-DPA1/CCL5/MNDA/IL7R/RASGRP1/MZB1/TYROBP/LILRB2/TAC1/HLA-DMB/IGFBP2/SYK	18
	BP	GO:0072503	cellular divalent inorganic cation homeostasis	24/301	480/18862	8.74025e-07	5.16579e-05	3.99418e-05	CXCL12/S100A9/ATP1A2/CCL19/C5AR1/S100A8/CD52/THY1/ATP1B1/CCL8/CCL11/LPAR1/CEMIP/CORO1A/CXCL13/CCL5/STC1/CXCR4/FGF2/CCR1/TAC1/CCR5/GNA15/LCK	24
	BP	GO:0034612	response to tumor necrosis factor	19/301	320/18862	1.0242e-06	5.95077e-05	4.60113e-05	CXCL16/CCL19/LAPTM5/VCAM1/CHI3L1/CCL18/KRT18/CCL8/CCL11/CXCL8/PLVAP/TNFRSF11B/CCL5/ADIPOQ/CD27/CCL4/TNFRSF17/CD14/SYK	19
	BP	GO:0071216	cellular response to biotic stimulus	16/301	233/18862	1.12847e-06	6.44735e-05	4.98508e-05	PPBP/HCK/CXCL5/CTSG/LY86/CXCL8/TREM2/CXCL13/CCL5/CXCL1/LILRB2/CCR5/TLR2/CD14/SYK/LY96	16
	BP	GO:0055074	calcium ion homeostasis	23/301	454/18862	1.18985e-06	6.68654e-05	5.17003e-05	CXCL12/ATP1A2/CCL19/C5AR1/CD52/THY1/ATP1B1/FAM20A/CCL8/CCL11/LPAR1/CEMIP/CORO1A/CXCL13/CCL5/STC1/CXCR4/FGF2/CCR1/TAC1/CCR5/GNA15/LCK	23
	BP	GO:0071219	cellular response to molecule of bacterial origin	15/301	209/18862	1.41173e-06	7.69504e-05	5.9498e-05	PPBP/HCK/CXCL5/CTSG/LY86/CXCL8/TREM2/CXCL13/CCL5/CXCL1/LILRB2/CCR5/TLR2/CD14/LY96	15
	BP	GO:0050863	regulation of T cell activation	19/301	327/18862	1.4142e-06	7.69504e-05	5.9498e-05	CCL19/RAC2/LAPTM5/THY1/VCAM1/CLEC4G/CD2/CORO1A/NRARP/HLA-DPA1/CCL5/IL7R/CD27/HLA-DRA/LILRB2/HLA-DMB/IGFBP2/LCK/SYK	19
	BP	GO:0002449	lymphocyte mediated immunity	20/301	360/18862	1.49112e-06	7.98681e-05	6.17539e-05	FCER1G/IGLC1/C6/IGKC/GZMB/IGHM/IGLV1-44/TRBC1/CLEC4G/CORO1A/TLR8/IGHD/C7/SLAMF7/IL7R/CD27/HLA-DRA/RASGRP1/CTSC/IGLL5	20
	BP	GO:0046849	bone remodeling	10/301	89/18862	1.54205e-06	8.13255e-05	6.28808e-05	SPP1/RAC2/CTHRC1/TMEM119/ACP5/PDK4/GREM1/TNFRSF11B/GPR137B/SYK	10
	BP	GO:0002690	positive regulation of leukocyte chemotaxis	10/301	91/18862	1.89501e-06	9.84259e-05	7.61028e-05	CXCL12/CCL19/RAC2/C5AR1/CXCL8/CXCL13/CCL5/PLA2G7/CCL4/CCR1	10
	BP	GO:0006968	cellular defense response	8/301	54/18862	2.10823e-06	0.000107866	8.34018e-05	C5AR1/CLEC5A/MNDA/TYROBP/LILRB2/CCR5/ITK/LY96	8
	BP	GO:0022409	positive regulation of cell-cell adhesion	17/301	276/18862	2.33151e-06	0.000117536	9.08784e-05	PLAUR/CCL19/THY1/VCAM1/CORO1A/ITGA4/CXCL13/HLA-DPA1/CCL5/IL7R/CD27/HLA-DRA/LILRB2/HLA-DMB/IGFBP2/LCK/SYK	17
	BP	GO:0006874	cellular calcium ion homeostasis	22/301	442/18862	2.72276e-06	0.00013527	0.000104591	CXCL12/ATP1A2/CCL19/C5AR1/CD52/THY1/ATP1B1/CCL8/CCL11/LPAR1/CEMIP/CORO1A/CXCL13/CCL5/STC1/CXCR4/FGF2/CCR1/TAC1/CCR5/GNA15/LCK	22
	BP	GO:0050864	regulation of B cell activation	14/301	193/18862	2.80307e-06	0.000137262	0.000106131	SLAMF8/LAPTM5/IGLC1/IGKC/IGHM/TRBC1/GPR183/IGHD/MNDA/CD27/MZB1/TYROBP/SYK/IGLL5	14
	BP	GO:0006816	calcium ion transport	21/301	409/18862	2.84293e-06	0.000137262	0.000106131	CXCL12/GPM6A/ATP1A2/CCL19/THY1/WNK3/ATP1B1/ADRA2A/CCL8/CEMIP/CORO1A/PLP1/CCL5/STC1/CCL4/CXCR4/LILRB2/FGF2/CCR1/CCR5/LCK	21
	BP	GO:0072676	lymphocyte migration	11/301	118/18862	2.99695e-06	0.000142688	0.000110326	CXCL16/CXCL12/CCL19/CCL18/CCL8/CCL11/GPR183/ITGA4/CXCL13/CCL5/CCL4	11
	BP	GO:0032757	positive regulation of interleukin-8 production	8/301	57/18862	3.21221e-06	0.000150842	0.000116631	CD2/TLR8/FCN1/ADIPOQ/TLR2/CD14/IL17D/SYK	8
	BP	GO:0090025	regulation of monocyte chemotaxis	6/301	27/18862	3.50688e-06	0.000162454	0.000125609	CXCL12/SLAMF8/GREM1/CCL5/PLA2G7/CCR1	6
	BP	GO:0071222	cellular response to lipopolysaccharide	14/301	197/18862	3.56429e-06	0.000162912	0.000125963	PPBP/HCK/CXCL5/CTSG/LY86/CXCL8/CXCL13/CCL5/CXCL1/LILRB2/CCR5/TLR2/CD14/LY96	14
	BP	GO:0010466	negative regulation of peptidase activity	16/301	257/18862	4.04113e-06	0.000182276	0.000140936	PLAUR/MMP9/SLPI/KLF4/SERPINA1/SFRP2/TIMP4/CPAMD8/TFPI2/LAMP3/CD27/SPOCK3/PI15/SPOCK1/RPS6KA1/CSTA	16
	BP	GO:0052547	regulation of peptidase activity	22/301	455/18862	4.34142e-06	0.000193278	0.000149442	FN1/PLAUR/S100A9/MMP9/LAPTM5/S100A8/SLPI/KLF4/SERPINA1/SFRP2/TIMP4/CPAMD8/TFPI2/LAMP3/CD27/SPOCK3/PI15/SPOCK1/RPS6KA1/LCK/SYK/CSTA	22
	BP	GO:0045766	positive regulation of angiogenesis	13/301	175/18862	4.90394e-06	0.000212794	0.000164532	C5AR1/CHI3L1/HMOX1/KLF4/CMA1/APELA/CCL11/SFRP2/CXCL8/ANXA3/GREM1/CXCR4/FGF2	13
	BP	GO:1904018	positive regulation of vasculature development	13/301	175/18862	4.90394e-06	0.000212794	0.000164532	C5AR1/CHI3L1/HMOX1/KLF4/CMA1/APELA/CCL11/SFRP2/CXCL8/ANXA3/GREM1/CXCR4/FGF2	13
	BP	GO:0042116	macrophage activation	10/301	102/18862	5.38239e-06	0.000230635	0.000178327	CD93/C5AR1/TREM2/TLR8/LRFN5/TYROBP/GPR137B/CTSC/TLR2/SYK	10
	BP	GO:0035987	endodermal cell differentiation	7/301	44/18862	5.67829e-06	0.000237917	0.000183957	FN1/MMP9/COL5A2/COL11A1/COL5A1/COL4A2/ITGA4	7
	BP	GO:1903039	positive regulation of leukocyte cell-cell adhesion	15/301	234/18862	5.69113e-06	0.000237917	0.000183957	CCL19/THY1/VCAM1/CORO1A/ITGA4/HLA-DPA1/CCL5/IL7R/CD27/HLA-DRA/LILRB2/HLA-DMB/IGFBP2/LCK/SYK	15
	BP	GO:0032637	interleukin-8 production	10/301	103/18862	5.87813e-06	0.000242774	0.000187712	CHI3L1/KLF4/CD2/TLR8/FCN1/ADIPOQ/TLR2/CD14/IL17D/SYK	10
	BP	GO:0071356	cellular response to tumor necrosis factor	17/301	296/18862	5.9547e-06	0.000243008	0.000187894	CCL19/LAPTM5/VCAM1/CHI3L1/CCL18/KRT18/CCL8/CCL11/CXCL8/PLVAP/TNFRSF11B/CCL5/ADIPOQ/CD27/CCL4/TNFRSF17/SYK	17
	BP	GO:0045453	bone resorption	8/301	62/18862	6.13413e-06	0.000247386	0.000191278	SPP1/RAC2/TMEM119/ACP5/PDK4/TNFRSF11B/GPR137B/SYK	8
	BP	GO:0051924	regulation of calcium ion transport	15/301	238/18862	6.98627e-06	0.000278476	0.000215317	CXCL12/ATP1A2/THY1/WNK3/ATP1B1/ADRA2A/CEMIP/CORO1A/PLP1/CCL5/STC1/CCL4/CXCR4/LILRB2/CCR1	15
	BP	GO:0070374	positive regulation of ERK1 and ERK2 cascade	14/301	210/18862	7.46652e-06	0.000294198	0.000227474	CCL19/C5AR1/CHI3L1/CCL18/APELA/CCL8/CCL11/TREM2/GPR183/CCL5/RASGRP1/CCL4/FGF2/CCR1	14
	BP	GO:0045765	regulation of angiogenesis	18/301	335/18862	7.95817e-06	0.000310007	0.000239697	C5AR1/THBS2/CHI3L1/HMOX1/KLF4/CMA1/COL4A2/SULF1/APELA/CCL11/SFRP2/CXCL8/ANXA3/GREM1/CXCL13/ENPP2/CXCR4/FGF2	18
	BP	GO:0050870	positive regulation of T cell activation	14/301	212/18862	8.32225e-06	0.000320547	0.000247846	CCL19/THY1/VCAM1/CORO1A/HLA-DPA1/CCL5/IL7R/CD27/HLA-DRA/LILRB2/HLA-DMB/IGFBP2/LCK/SYK	14
	BP	GO:0030574	collagen catabolic process	7/301	47/18862	8.9455e-06	0.000340724	0.000263448	MMP12/CTSB/MMP9/MMP1/MMP13/CTSS/FAP	7
	BP	GO:0048245	eosinophil chemotaxis	5/301	19/18862	9.68828e-06	0.000364961	0.000282187	SCG2/CCL8/CCL11/CCL5/CCL4	5
	BP	GO:0010951	negative regulation of endopeptidase activity	15/301	245/18862	9.8951e-06	0.0003687	0.000285079	PLAUR/MMP9/SLPI/KLF4/SERPINA1/SFRP2/TIMP4/CPAMD8/TFPI2/LAMP3/CD27/SPOCK3/SPOCK1/RPS6KA1/CSTA	15
	BP	GO:0002429	immune response-activating cell surface receptor signaling pathway	22/301	481/18862	1.04421e-05	0.00038059	0.000294272	THEMIS2/LAPTM5/C5AR1/HCK/FCER1G/THY1/IGLC1/IGKC/IGHM/IGLV1-44/TRBC1/IGHD/HLA-DPA1/FCN1/MNDA/HLA-DRA/CD3D/TYROBP/ITK/LCK/SYK/IGLL5	22
	BP	GO:0002757	immune response-activating signal transduction	22/301	481/18862	1.04421e-05	0.00038059	0.000294272	THEMIS2/LAPTM5/C5AR1/HCK/FCER1G/THY1/IGLC1/IGKC/IGHM/IGLV1-44/TRBC1/IGHD/HLA-DPA1/FCN1/MNDA/HLA-DRA/CD3D/TYROBP/ITK/LCK/SYK/IGLL5	22
	BP	GO:0007596	blood coagulation	18/301	342/18862	1.05473e-05	0.00038059	0.000294272	FN1/PLAUR/VWF/F10/FCER1G/PLAU/ADRA2A/PRKAR2B/TSPAN8/SERPINA1/F5/TFPI2/COMP/HPSE/GNA15/LCK/SYK/FAP	18
	BP	GO:0010959	regulation of metal ion transport	15/301	247/18862	1.09035e-05	0.000389344	0.000301041	CXCL12/ATP1A2/THY1/WNK3/ATP1B1/ADRA2A/CEMIP/CORO1A/PLP1/CCL5/STC1/CCL4/CXCR4/LILRB2/CCR1	15
	BP	GO:0050671	positive regulation of lymphocyte proliferation	11/301	135/18862	1.103e-05	0.000389803	0.000301395	CCL19/VCAM1/CORO1A/GPR183/HLA-DPA1/CCL5/LILRB2/TAC1/HLA-DMB/IGFBP2/SYK	11
	BP	GO:0071675	regulation of mononuclear cell migration	10/301	111/18862	1.14799e-05	0.000401563	0.000310488	CXCL12/SLAMF8/C5AR1/GREM1/ITGA4/CXCL13/CCL5/PLA2G7/CCL4/CCR1	10
	BP	GO:0032946	positive regulation of mononuclear cell proliferation	11/301	136/18862	1.18328e-05	0.000409726	0.000316799	CCL19/VCAM1/CORO1A/GPR183/HLA-DPA1/CCL5/LILRB2/TAC1/HLA-DMB/IGFBP2/SYK	11
	BP	GO:0030001	metal ion transport	22/301	486/18862	1.22642e-05	0.000418992	0.000323965	CXCL12/GPM6A/ATP1A2/CCL19/THY1/WNK3/ATP1B1/ADRA2A/CCL8/TMEM163/CEMIP/CORO1A/PLP1/CCL5/STC1/CCL4/CXCR4/LILRB2/FGF2/CCR1/CCR5/LCK	22
	BP	GO:0007599	hemostasis	18/301	346/18862	1.23449e-05	0.000418992	0.000323965	FN1/PLAUR/VWF/F10/FCER1G/PLAU/ADRA2A/PRKAR2B/TSPAN8/SERPINA1/F5/TFPI2/COMP/HPSE/GNA15/LCK/SYK/FAP	18
	BP	GO:0050817	coagulation	18/301	347/18862	1.28351e-05	0.000431362	0.000333528	FN1/PLAUR/VWF/F10/FCER1G/PLAU/ADRA2A/PRKAR2B/TSPAN8/SERPINA1/F5/TFPI2/COMP/HPSE/GNA15/LCK/SYK/FAP	18
	BP	GO:0046850	regulation of bone remodeling	7/301	51/18862	1.55936e-05	0.000517428	0.000400075	SPP1/TMEM119/PDK4/GREM1/TNFRSF11B/GPR137B/SYK	7
	BP	GO:0001704	formation of primary germ layer	10/301	115/18862	1.56979e-05	0.000517428	0.000400075	FN1/MMP9/COL5A2/COL11A1/COL5A1/KLF4/COL4A2/APELA/SFRP2/ITGA4	10
	BP	GO:0034341	response to interferon-gamma	13/301	197/18862	1.76248e-05	0.000575408	0.000444905	CXCL16/CCL19/HCK/VCAM1/CCL18/CCL8/CCL11/FCGR1B/HLA-DPA1/CCL5/HLA-DRA/CCL4/TLR2	13
	BP	GO:0052548	regulation of endopeptidase activity	20/301	426/18862	1.82489e-05	0.000590161	0.000456312	PLAUR/S100A9/MMP9/LAPTM5/S100A8/SLPI/KLF4/SERPINA1/SFRP2/TIMP4/CPAMD8/TFPI2/LAMP3/CD27/SPOCK3/SPOCK1/RPS6KA1/LCK/SYK/CSTA	20
	BP	GO:0030098	lymphocyte differentiation	18/301	358/18862	1.95005e-05	0.000624635	0.000482967	ITM2A/SLAMF8/CCL19/FCER1G/VCAM1/KIT/CD2/NRARP/GPR183/ITGA4/IL7R/CD27/HLA-DRA/CD3D/LILRB2/ITK/LCK/SYK	18
	BP	GO:0051928	positive regulation of calcium ion transport	10/301	118/18862	1.96793e-05	0.000624635	0.000482967	CXCL12/THY1/WNK3/ATP1B1/CEMIP/PLP1/CCL5/STC1/CCL4/CCR1	10
	BP	GO:0001706	endoderm formation	7/301	53/18862	2.02033e-05	0.000635385	0.000491279	FN1/MMP9/COL5A2/COL11A1/COL5A1/COL4A2/ITGA4	7
	BP	GO:0031349	positive regulation of defense response	18/301	361/18862	2.17882e-05	0.000678998	0.000525001	S100A9/MMP12/HCK/S100A8/FCER1G/COCH/TREM2/TLR8/FCN1/CCL5/MNDA/PLA2G7/RASGRP1/TYROBP/TAC1/CTSC/TLR2/SYK	18
	BP	GO:0006898	receptor-mediated endocytosis	17/301	328/18862	2.26012e-05	0.000697991	0.000539686	CXCL16/CCL19/FCER1G/IGLC1/HPR/IGKC/APELA/IGLV1-44/CXCL8/LRP1B/GREM1/FCGR1B/ITGA4/ADIPOQ/VLDLR/CD14/SYK	17
	BP	GO:0030199	collagen fibril organization	7/301	54/18862	2.28983e-05	0.000700853	0.000541899	LUM/COL5A2/COL11A1/COL5A1/SFRP2/GREM1/COMP	7
	BP	GO:0032677	regulation of interleukin-8 production	9/301	97/18862	2.49031e-05	0.000755467	0.000584126	KLF4/CD2/TLR8/FCN1/ADIPOQ/TLR2/CD14/IL17D/SYK	9
	BP	GO:0070665	positive regulation of leukocyte proliferation	11/301	148/18862	2.62212e-05	0.000788476	0.000609649	CCL19/VCAM1/CORO1A/GPR183/HLA-DPA1/CCL5/LILRB2/TAC1/HLA-DMB/IGFBP2/SYK	11
	BP	GO:0072677	eosinophil migration	5/301	23/18862	2.66049e-05	0.000793058	0.000613192	SCG2/CCL8/CCL11/CCL5/CCL4	5
	BP	GO:0002460	adaptive immune response based on somatic recombination of immune receptors built from immunoglobulin superfamily domains	18/301	367/18862	2.70947e-05	0.000800696	0.000619098	CCL19/FCER1G/IGLC1/C6/IGKC/IGHM/IGLV1-44/TRBC1/CLEC4G/TLR8/IGHD/CXCL13/C7/IL7R/CD27/HLA-DRA/CTSC/IGLL5	18
	BP	GO:0007492	endoderm development	8/301	76/18862	2.82029e-05	0.00081255	0.000628263	FN1/MMP9/COL5A2/COL11A1/COL5A1/COL4A2/APELA/ITGA4	8
	BP	GO:0071346	cellular response to interferon-gamma	12/301	177/18862	2.83869e-05	0.00081255	0.000628263	CCL19/HCK/VCAM1/CCL18/CCL8/CCL11/FCGR1B/HLA-DPA1/CCL5/HLA-DRA/CCL4/TLR2	12
	BP	GO:0002002	regulation of angiotensin levels in blood	4/301	12/18862	2.8444e-05	0.00081255	0.000628263	CTSG/CMA1/CPA3/ENPEP	4
	BP	GO:0002003	angiotensin maturation	4/301	12/18862	2.8444e-05	0.00081255	0.000628263	CTSG/CMA1/CPA3/ENPEP	4
	BP	GO:0042102	positive regulation of T cell proliferation	9/301	99/18862	2.93365e-05	0.000831121	0.000642622	CCL19/VCAM1/CORO1A/HLA-DPA1/CCL5/LILRB2/HLA-DMB/IGFBP2/SYK	9
	BP	GO:0010001	glial cell differentiation	13/301	210/18862	3.45105e-05	0.000969393	0.000749534	S100A9/C5AR1/S100A8/WASF3/RELN/MYOC/GAP43/LPAR1/TREM2/PLP1/CXCR4/TLR2/SOX9	13
	BP	GO:0006911	phagocytosis, engulfment	10/301	126/18862	3.47828e-05	0.000969393	0.000749534	RAC2/XKR4/IGLC1/IGKC/IGHM/TRBC1/TREM2/IGHD/IGLL5/BIN2	10
	BP	GO:0043491	protein kinase B signaling	15/301	273/18862	3.52252e-05	0.000973806	0.000752946	CCL19/RAC2/F10/CHI3L1/KIT/KLF4/MYOC/TMEM100/HCLS1/CCL5/BTC/FGF2/SOX9/HPSE/LCK	15
	BP	GO:1903131	mononuclear cell differentiation	19/301	411/18862	3.64935e-05	0.0010008	0.000773815	ITM2A/SLAMF8/CCL19/FCER1G/VCAM1/KIT/TREM2/CD2/NRARP/GPR183/ITGA4/IL7R/CD27/HLA-DRA/CD3D/LILRB2/ITK/LCK/SYK	19
	BP	GO:0019932	second-messenger-mediated signaling	16/301	307/18862	3.68043e-05	0.00100131	0.000774213	FHL2/ATP1A2/ATP1B1/VCAM1/PRKAR2B/NDNF/TMEM100/LPAR1/CXCL8/TREM2/CCL4/CXCR4/CCR1/CCR5/SOX9/SYK	16
	BP	GO:0001501	skeletal system development	21/301	486/18862	3.83312e-05	0.00103464	0.000799982	LUM/MMP9/COL5A2/COL11A1/TMEM119/CHI3L1/KIT/MYOC/SULF1/TGFBI/SFRP2/CHRDL2/COL10A1/GREM1/TNFRSF11B/STC1/MMP13/TYROBP/FGF2/SOX9/COMP	21
	BP	GO:0007204	positive regulation of cytosolic calcium ion concentration	16/301	310/18862	4.13595e-05	0.00110766	0.000856442	ATP1A2/CCL19/C5AR1/CD52/THY1/LPAR1/CEMIP/CORO1A/CXCL13/CXCR4/FGF2/CCR1/TAC1/CCR5/GNA15/LCK	16
	BP	GO:0030217	T cell differentiation	14/301	246/18862	4.37962e-05	0.00115567	0.00089356	CCL19/FCER1G/KIT/CD2/NRARP/GPR183/IL7R/CD27/HLA-DRA/CD3D/LILRB2/ITK/LCK/SYK	14
	BP	GO:0051216	cartilage development	12/301	185/18862	4.38263e-05	0.00115567	0.00089356	LUM/COL11A1/CHI3L1/SULF1/TGFBI/SFRP2/CHRDL2/GREM1/STC1/FGF2/SOX9/COMP	12
	BP	GO:1902105	regulation of leukocyte differentiation	15/301	279/18862	4.51937e-05	0.00118263	0.000914406	SLAMF8/CCL19/TREM2/CD2/HCLS1/NRARP/ADIPOQ/IL7R/CD27/HLA-DRA/TYROBP/GPR137B/LILRB2/CCR1/SYK	15
	BP	GO:0010518	positive regulation of phospholipase activity	7/301	60/18862	4.60194e-05	0.00119511	0.000924058	C5AR1/KIT/LPAR1/CCL5/FGF2/GNA15/ITK	7
	BP	GO:0050853	B cell receptor signaling pathway	10/301	134/18862	5.88654e-05	0.00151722	0.00117311	IGLC1/IGKC/IGHM/TRBC1/IGHD/MNDA/ITK/LCK/SYK/IGLL5	10
	BP	GO:0002697	regulation of immune effector process	20/301	465/18862	6.2516e-05	0.00159192	0.00123087	SLAMF8/MMP12/CCL19/RAC2/LAPTM5/C5AR1/IGLC1/C6/IGKC/HMOX1/IGLV1-44/CLEC4G/C7/IL7R/HLA-DRA/RASGRP1/MZB1/TYROBP/HLA-DMB/SYK	20
	BP	GO:0099024	plasma membrane invagination	10/301	135/18862	6.26922e-05	0.00159192	0.00123087	RAC2/XKR4/IGLC1/IGKC/IGHM/TRBC1/TREM2/IGHD/IGLL5/BIN2	10
	BP	GO:0071677	positive regulation of mononuclear cell migration	7/301	63/18862	6.32912e-05	0.00159531	0.00123349	CXCL12/ITGA4/CXCL13/CCL5/PLA2G7/CCL4/CCR1	7
	BP	GO:0050731	positive regulation of peptidyl-tyrosine phosphorylation	12/301	193/18862	6.60703e-05	0.00164223	0.00126977	ADRA2A/KIT/RELN/CRLF1/TREM2/HCLS1/GREM1/CCL5/ADIPOQ/BTC/ENPP2/SYK	12
	BP	GO:0010863	positive regulation of phospholipase C activity	6/301	44/18862	6.65898e-05	0.00164223	0.00126977	C5AR1/KIT/LPAR1/FGF2/GNA15/ITK	6
	BP	GO:0045124	regulation of bone resorption	6/301	44/18862	6.65898e-05	0.00164223	0.00126977	SPP1/TMEM119/PDK4/TNFRSF11B/GPR137B/SYK	6
	BP	GO:0050851	antigen receptor-mediated signaling pathway	16/301	323/18862	6.73696e-05	0.00164959	0.00127546	THEMIS2/LAPTM5/THY1/IGLC1/IGKC/IGHM/TRBC1/IGHD/HLA-DPA1/MNDA/HLA-DRA/CD3D/ITK/LCK/SYK/IGLL5	16
	BP	GO:0090132	epithelium migration	17/301	360/18862	7.23284e-05	0.00175845	0.00135963	SCG2/MMP9/KIT/HMOX1/KLF4/NANOS1/ID1/APELA/ANXA3/GREM1/CXCL13/STC1/ENPP2/FGF2/TAC1/SOX9/FAP	17
	BP	GO:0042098	T cell proliferation	12/301	195/18862	7.29561e-05	0.00176122	0.00136178	CCL19/RAC2/VCAM1/CLEC4G/CORO1A/HLA-DPA1/CCL5/RASGRP1/LILRB2/HLA-DMB/IGFBP2/SYK	12
	BP	GO:0032760	positive regulation of tumor necrosis factor production	8/301	87/18862	7.51209e-05	0.0018008	0.00139238	CCL19/CD2/RASGRP1/TYROBP/TLR2/CD14/SYK/LY96	8
	BP	GO:0021782	glial cell development	9/301	112/18862	7.77394e-05	0.00185063	0.0014309	S100A9/C5AR1/S100A8/WASF3/MYOC/LPAR1/TREM2/PLP1/TLR2	9
	BP	GO:0001894	tissue homeostasis	14/301	260/18862	7.9536e-05	0.00188034	0.00145388	SPP1/RAC2/WNK3/TMEM119/IGKC/NANOS1/ACP5/CORO1A/PDK4/TNFRSF11B/LYZ/GPR137B/SOX9/SYK	14
	BP	GO:0001909	leukocyte mediated cytotoxicity	9/301	113/18862	8.33031e-05	0.00194502	0.00150389	CTSG/GZMB/CORO1A/SLAMF7/IL7R/HLA-DRA/RASGRP1/TYROBP/CTSC	9
	BP	GO:0042129	regulation of T cell proliferation	11/301	168/18862	8.35937e-05	0.00194502	0.00150389	CCL19/RAC2/VCAM1/CLEC4G/CORO1A/HLA-DPA1/CCL5/LILRB2/HLA-DMB/IGFBP2/SYK	11
	BP	GO:0019722	calcium-mediated signaling	12/301	198/18862	8.44429e-05	0.00194502	0.00150389	FHL2/ATP1A2/ATP1B1/VCAM1/TMEM100/CXCL8/TREM2/CCL4/CXCR4/CCR1/CCR5/SYK	12
	BP	GO:0090130	tissue migration	17/301	365/18862	8.55934e-05	0.00194502	0.00150389	SCG2/MMP9/KIT/HMOX1/KLF4/NANOS1/ID1/APELA/ANXA3/GREM1/CXCL13/STC1/ENPP2/FGF2/TAC1/SOX9/FAP	17
	BP	GO:1900274	regulation of phospholipase C activity	6/301	46/18862	8.60283e-05	0.00194502	0.00150389	C5AR1/KIT/LPAR1/FGF2/GNA15/ITK	6
	BP	GO:2000107	negative regulation of leukocyte apoptotic process	6/301	46/18862	8.60283e-05	0.00194502	0.00150389	CXCL12/CCL19/HCLS1/CCL5/IL7R/CD27	6
	BP	GO:0050730	regulation of peptidyl-tyrosine phosphorylation	14/301	262/18862	8.63023e-05	0.00194502	0.00150389	THY1/ADRA2A/KIT/RELN/SFRP2/CRLF1/TREM2/HCLS1/GREM1/CCL5/ADIPOQ/BTC/ENPP2/SYK	14
	BP	GO:0002063	chondrocyte development	5/301	29/18862	8.6811e-05	0.00194502	0.00150389	COL11A1/SULF1/SFRP2/SOX9/COMP	5
	BP	GO:0002683	negative regulation of immune system process	18/301	403/18862	9.06447e-05	0.00201773	0.00156011	CXCL12/SLAMF8/MMP12/LAPTM5/THY1/HMOX1/CLEC4G/NRARP/GREM1/LRFN5/ADIPOQ/MNDA/IL7R/TYROBP/GPR137B/LILRB2/SOX9/IL17D	18
	BP	GO:1901224	positive regulation of NIK/NF-kappaB signaling	7/301	67/18862	9.42208e-05	0.0020838	0.00161119	CCL19/LAPTM5/TREM2/GREM1/CD27/TLR2/CD14	7
	BP	GO:0014068	positive regulation of phosphatidylinositol 3-kinase signaling	8/301	90/18862	9.56262e-05	0.00208794	0.00161439	FN1/KIT/MYOC/HCLS1/CCL5/HCST/FGF2/SOX9	8
	BP	GO:1903557	positive regulation of tumor necrosis factor superfamily cytokine production	8/301	90/18862	9.56262e-05	0.00208794	0.00161439	CCL19/CD2/RASGRP1/TYROBP/TLR2/CD14/SYK/LY96	8
	BP	GO:0001774	microglial cell activation	6/301	47/18862	9.73088e-05	0.00210643	0.00162869	C5AR1/TREM2/TLR8/TYROBP/CTSC/TLR2	6
	BP	GO:0018108	peptidyl-tyrosine phosphorylation	17/301	369/18862	9.7702e-05	0.00210643	0.00162869	HCK/THY1/ADRA2A/KIT/RELN/SFRP2/CRLF1/TREM2/HCLS1/GREM1/CCL5/ADIPOQ/BTC/ENPP2/ITK/LCK/SYK	17
	BP	GO:0010324	membrane invagination	10/301	143/18862	0.000101669	0.00217515	0.00168182	RAC2/XKR4/IGLC1/IGKC/IGHM/TRBC1/TREM2/IGHD/IGLL5/BIN2	10
	BP	GO:0009612	response to mechanical stimulus	12/301	202/18862	0.000102158	0.00217515	0.00168182	CXCL12/ATP1A2/TNC/MEIS2/COL11A1/CHI3L1/KIT/TLR8/CXCR4/IGFBP2/SOX9/FOSB	12
	BP	GO:0050679	positive regulation of epithelial cell proliferation	12/301	203/18862	0.000107056	0.00223853	0.00173083	SCG2/CXCL12/MMP12/C5AR1/HMOX1/ID1/APELA/CCL11/NRARP/ITGA4/FGF2/SOX9	12
	BP	GO:0106106	cold-induced thermogenesis	10/301	144/18862	0.000107741	0.00223853	0.00173083	ID1/ADRB1/PLAC8/ACADL/ADIPOQ/ADAMTS5/ZNF423/CXCR4/ALDH1A1/SYK	10
	BP	GO:0120161	regulation of cold-induced thermogenesis	10/301	144/18862	0.000107741	0.00223853	0.00173083	ID1/ADRB1/PLAC8/ACADL/ADIPOQ/ADAMTS5/ZNF423/CXCR4/ALDH1A1/SYK	10
	BP	GO:0018212	peptidyl-tyrosine modification	17/301	372/18862	0.000107747	0.00223853	0.00173083	HCK/THY1/ADRA2A/KIT/RELN/SFRP2/CRLF1/TREM2/HCLS1/GREM1/CCL5/ADIPOQ/BTC/ENPP2/ITK/LCK/SYK	17
	BP	GO:0043281	regulation of cysteine-type endopeptidase activity involved in apoptotic process	12/301	205/18862	0.00011746	0.00242561	0.00187548	PLAUR/S100A9/MMP9/LAPTM5/S100A8/KLF4/SFRP2/LAMP3/CD27/RPS6KA1/LCK/SYK	12
	BP	GO:0051897	positive regulation of protein kinase B signaling	11/301	175/18862	0.000120346	0.00246909	0.0019091	CCL19/RAC2/F10/CHI3L1/KIT/MYOC/HCLS1/BTC/FGF2/HPSE/LCK	11
	BP	GO:0019835	cytolysis	5/301	31/18862	0.000121006	0.00246909	0.0019091	C6/GZMB/C7/LYZ/GZMA	5
	BP	GO:0010517	regulation of phospholipase activity	7/301	70/18862	0.000124696	0.00252933	0.00195568	C5AR1/KIT/LPAR1/CCL5/FGF2/GNA15/ITK	7
	BP	GO:0006956	complement activation	11/301	178/18862	0.000139876	0.00279113	0.0021581	C5AR1/IGLC1/C6/IGKC/IGHM/IGLV1-44/TRBC1/IGHD/FCN1/C7/IGLL5	11
	BP	GO:0032602	chemokine production	8/301	95/18862	0.000139996	0.00279113	0.0021581	S100A9/S100A8/HMOX1/KLF4/TREM2/ADIPOQ/TLR2/SYK	8
	BP	GO:0051480	regulation of cytosolic calcium ion concentration	16/301	344/18862	0.000140045	0.00279113	0.0021581	ATP1A2/CCL19/C5AR1/CD52/THY1/LPAR1/CEMIP/CORO1A/CXCL13/CXCR4/FGF2/CCR1/TAC1/CCR5/GNA15/LCK	16
	BP	GO:0001906	cell killing	11/301	179/18862	0.000146958	0.00289524	0.0022386	CTSG/GZMB/CORO1A/LYZ/SLAMF7/IL7R/HLA-DRA/RASGRP1/TYROBP/CTSC/SYK	11
	BP	GO:0007369	gastrulation	11/301	179/18862	0.000146958	0.00289524	0.0022386	FN1/MMP9/COL5A2/COL11A1/COL5A1/KLF4/COL4A2/APELA/SFRP2/ITGA4/ADIPOQ	11
	BP	GO:0043154	negative regulation of cysteine-type endopeptidase activity involved in apoptotic process	7/301	72/18862	0.000149129	0.00291475	0.00225368	PLAUR/MMP9/KLF4/SFRP2/LAMP3/CD27/RPS6KA1	7
	BP	GO:0045861	negative regulation of proteolysis	16/301	346/18862	0.000149649	0.00291475	0.00225368	PLAUR/MMP9/SLPI/KLF4/SERPINA1/SFRP2/TIMP4/CPAMD8/TFPI2/LAMP3/CD27/SPOCK3/PI15/SPOCK1/RPS6KA1/CSTA	16
	BP	GO:0061448	connective tissue development	13/301	243/18862	0.000151977	0.00294338	0.00227582	LUM/COL11A1/CHI3L1/COL5A1/SULF1/TGFBI/SFRP2/CHRDL2/GREM1/STC1/FGF2/SOX9/COMP	13
	BP	GO:1904645	response to amyloid-beta	6/301	51/18862	0.000154721	0.00297967	0.00230388	MMP12/MMP9/VCAM1/TREM2/ITGA4/MMP13	6
	BP	GO:0008360	regulation of cell shape	10/301	151/18862	0.000159467	0.00305394	0.0023613	FN1/RAC2/HCK/COCH/WASF3/KIT/CCL11/LPAR1/CORO1A/RHOU	10
	BP	GO:0060193	positive regulation of lipase activity	7/301	73/18862	0.000162724	0.0030705	0.00237411	C5AR1/KIT/LPAR1/CCL5/FGF2/GNA15/ITK	7
	BP	GO:0001991	regulation of systemic arterial blood pressure by circulatory renin-angiotensin	4/301	18/18862	0.00016302	0.0030705	0.00237411	CTSG/CMA1/CPA3/ENPEP	4
	BP	GO:0046851	negative regulation of bone remodeling	4/301	18/18862	0.00016302	0.0030705	0.00237411	TMEM119/GREM1/TNFRSF11B/GPR137B	4
	BP	GO:1990845	adaptive thermogenesis	10/301	153/18862	0.00017761	0.00332703	0.00257245	ID1/ADRB1/PLAC8/ACADL/ADIPOQ/ADAMTS5/ZNF423/CXCR4/ALDH1A1/SYK	10
	BP	GO:1902107	positive regulation of leukocyte differentiation	10/301	154/18862	0.000187313	0.00347086	0.00268366	CCL19/TREM2/HCLS1/IL7R/CD27/HLA-DRA/TYROBP/LILRB2/CCR1/SYK	10
	BP	GO:1903708	positive regulation of hemopoiesis	10/301	154/18862	0.000187313	0.00347086	0.00268366	CCL19/TREM2/HCLS1/IL7R/CD27/HLA-DRA/TYROBP/LILRB2/CCR1/SYK	10
	BP	GO:0050673	epithelial cell proliferation	18/301	428/18862	0.000191646	0.00353205	0.00273098	SCG2/CXCL12/MMP12/C5AR1/KIT/HMOX1/ID1/SULF1/APELA/CCL11/SFRP2/IGFBP4/NRARP/ITGA4/FGF2/SOX9/RPS6KA1/FAP	18
	BP	GO:0042063	gliogenesis	14/301	283/18862	0.000193624	0.00354943	0.00274442	S100A9/C5AR1/S100A8/WASF3/RELN/MYOC/GAP43/LPAR1/TREM2/PLP1/GPR183/CXCR4/TLR2/SOX9	14
	BP	GO:0014066	regulation of phosphatidylinositol 3-kinase signaling	9/301	127/18862	0.000203678	0.00371387	0.00287156	FN1/KIT/KLF4/MYOC/HCLS1/CCL5/HCST/FGF2/SOX9	9
	BP	GO:0010631	epithelial cell migration	16/301	357/18862	0.000213428	0.00387107	0.00299311	SCG2/MMP9/KIT/HMOX1/KLF4/NANOS1/ID1/ANXA3/GREM1/CXCL13/STC1/ENPP2/FGF2/TAC1/SOX9/FAP	16
	BP	GO:0031589	cell-substrate adhesion	16/301	359/18862	0.000227266	0.00410036	0.00317039	FN1/MMP12/VWF/RAC2/PLAU/THY1/VCAM1/ID1/NDNF/MYOC/CORO1A/GREM1/ITGA4/VIT/SPOCK1/HPSE	16
	BP	GO:0001667	ameboidal-type cell migration	19/301	473/18862	0.000229303	0.00411544	0.00318206	SCG2/FN1/MMP9/KIT/HMOX1/KLF4/NANOS1/ID1/APELA/ANXA3/GREM1/ITGA4/CXCL13/STC1/ENPP2/FGF2/TAC1/SOX9/FAP	19
	BP	GO:0061844	antimicrobial humoral immune response mediated by antimicrobial peptide	7/301	78/18862	0.000246557	0.00440206	0.00340367	PPBP/S100A9/CXCL5/RNASE6/CXCL8/CXCL13/CXCL1	7
	BP	GO:0034104	negative regulation of tissue remodeling	4/301	20/18862	0.000251698	0.00444753	0.00343882	TMEM119/GREM1/TNFRSF11B/GPR137B	4
	BP	GO:0090026	positive regulation of monocyte chemotaxis	4/301	20/18862	0.000251698	0.00444753	0.00343882	CXCL12/CCL5/PLA2G7/CCR1	4
	BP	GO:0032680	regulation of tumor necrosis factor production	10/301	160/18862	0.000255384	0.00448951	0.00347129	CCL19/TREM2/CD2/ADIPOQ/RASGRP1/TYROBP/TLR2/CD14/SYK/LY96	10
	BP	GO:0016064	immunoglobulin mediated immune response	12/301	223/18862	0.000257074	0.00449618	0.00347644	FCER1G/IGLC1/C6/IGKC/IGHM/IGLV1-44/TRBC1/TLR8/IGHD/C7/CD27/IGLL5	12
	BP	GO:0002833	positive regulation of response to biotic stimulus	13/301	258/18862	0.000273044	0.00475124	0.00367365	MMP12/HCK/FCER1G/COCH/LY86/TLR8/FCN1/CCL5/MNDA/RASGRP1/TYROBP/SYK/LY96	13
	BP	GO:0050727	regulation of inflammatory response	16/301	366/18862	0.000282018	0.00485015	0.00375013	S100A9/SLAMF8/MMP9/HCK/S100A8/KLF4/CMA1/TREM2/TNFAIP6/LRFN5/CCL5/ADIPOQ/PLA2G7/TAC1/CTSC/TLR2	16
	BP	GO:0032640	tumor necrosis factor production	10/301	162/18862	0.000282234	0.00485015	0.00375013	CCL19/TREM2/CD2/ADIPOQ/RASGRP1/TYROBP/TLR2/CD14/SYK/LY96	10
	BP	GO:0060348	bone development	11/301	193/18862	0.000282973	0.00485015	0.00375013	TMEM119/KIT/MYOC/SULF1/SFRP2/GREM1/STC1/MMP13/TYROBP/SOX9/COMP	11
	BP	GO:2000403	positive regulation of lymphocyte migration	5/301	37/18862	0.000287078	0.00489604	0.00378561	CXCL12/ITGA4/CXCL13/CCL5/CCL4	5
	BP	GO:2000117	negative regulation of cysteine-type endopeptidase activity	7/301	80/18862	0.000288544	0.00489668	0.00378611	PLAUR/MMP9/KLF4/SFRP2/LAMP3/CD27/RPS6KA1	7
	BP	GO:0019724	B cell mediated immunity	12/301	226/18862	0.000290487	0.00490536	0.00379282	FCER1G/IGLC1/C6/IGKC/IGHM/IGLV1-44/TRBC1/TLR8/IGHD/C7/CD27/IGLL5	12
	BP	GO:0033630	positive regulation of cell adhesion mediated by integrin	4/301	21/18862	0.000307035	0.00515939	0.00398923	SFRP2/CXCL13/CCL5/SYK	4
	BP	GO:1903034	regulation of response to wounding	10/301	164/18862	0.000311407	0.00518206	0.00400676	PLAUR/SPP1/PLAU/ADRA2A/KLF4/TSPAN8/CXCR4/FGF2/HPSE/FAP	10
	BP	GO:1903555	regulation of tumor necrosis factor superfamily cytokine production	10/301	164/18862	0.000311407	0.00518206	0.00400676	CCL19/TREM2/CD2/ADIPOQ/RASGRP1/TYROBP/TLR2/CD14/SYK/LY96	10
	BP	GO:0031663	lipopolysaccharide-mediated signaling pathway	6/301	58/18862	0.00031674	0.00524533	0.00405569	HCK/LY86/CCL5/TLR2/CD14/LY96	6
	BP	GO:0007584	response to nutrient	10/301	165/18862	0.000326913	0.00538778	0.00416582	TNC/SPP1/VCAM1/HMOX1/SFRP2/OTC/TNFRSF11B/ADIPOQ/STC1/IGFBP2	10
	BP	GO:0001938	positive regulation of endothelial cell proliferation	8/301	108/18862	0.00033923	0.00556178	0.00430037	SCG2/CXCL12/HMOX1/APELA/CCL11/NRARP/ITGA4/FGF2	8
	BP	GO:2000116	regulation of cysteine-type endopeptidase activity	12/301	230/18862	0.000340716	0.00556178	0.00430037	PLAUR/S100A9/MMP9/LAPTM5/S100A8/KLF4/SFRP2/LAMP3/CD27/RPS6KA1/LCK/SYK	12
	BP	GO:0071706	tumor necrosis factor superfamily cytokine production	10/301	167/18862	0.000359862	0.00583922	0.00451488	CCL19/TREM2/CD2/ADIPOQ/RASGRP1/TYROBP/TLR2/CD14/SYK/LY96	10
	BP	GO:0032963	collagen metabolic process	8/301	109/18862	0.000361118	0.00583922	0.00451488	MMP12/CTSB/MMP9/COL5A1/MMP1/MMP13/CTSS/FAP	8
	BP	GO:0003081	regulation of systemic arterial blood pressure by renin-angiotensin	4/301	22/18862	0.000370577	0.00596402	0.00461138	CTSG/CMA1/CPA3/ENPEP	4
	BP	GO:1903706	regulation of hemopoiesis	17/301	415/18862	0.000389399	0.00623766	0.00482296	SLAMF8/CCL19/MEIS2/TREM2/CD2/HCLS1/NRARP/ADIPOQ/IL7R/CD27/HLA-DRA/TYROBP/GPR137B/LILRB2/CCR1/IL17D/SYK	17
	BP	GO:0051346	negative regulation of hydrolase activity	18/301	456/18862	0.000411074	0.00655423	0.00506773	PLAUR/MMP9/SLPI/KLF4/SERPINA1/SFRP2/TIMP4/CPAMD8/TFPI2/LAMP3/CD27/GZMA/PPP1R1B/SPOCK3/PI15/SPOCK1/RPS6KA1/CSTA	18
	BP	GO:0022604	regulation of cell morphogenesis	14/301	305/18862	0.000414108	0.00657205	0.00508151	FN1/RAC2/HCK/COCH/WASF3/KIT/RELN/MYOC/CCL11/LPAR1/CORO1A/RHOU/ENPP2/CXCR4	14
	BP	GO:0051209	release of sequestered calcium ion into cytosol	8/301	112/18862	0.000433782	0.00682619	0.00527801	ATP1A2/CCL19/THY1/CEMIP/CORO1A/FGF2/CCR5/LCK	8
	BP	GO:0001659	temperature homeostasis	10/301	171/18862	0.000434104	0.00682619	0.00527801	ID1/ADRB1/PLAC8/ACADL/ADIPOQ/ADAMTS5/ZNF423/CXCR4/ALDH1A1/SYK	10
	BP	GO:0006958	complement activation, classical pathway	9/301	141/18862	0.000442954	0.00689183	0.00532876	IGLC1/C6/IGKC/IGHM/IGLV1-44/TRBC1/IGHD/C7/IGLL5	9
	BP	GO:0070391	response to lipoteichoic acid	3/301	10/18862	0.00044431	0.00689183	0.00532876	TREM2/TLR2/CD14	3
	BP	GO:0071223	cellular response to lipoteichoic acid	3/301	10/18862	0.00044431	0.00689183	0.00532876	TREM2/TLR2/CD14	3
	BP	GO:0034103	regulation of tissue remodeling	7/301	86/18862	0.000449989	0.00694848	0.00537256	SPP1/TMEM119/PDK4/GREM1/TNFRSF11B/GPR137B/SYK	7
	BP	GO:0002573	myeloid leukocyte differentiation	11/301	204/18862	0.000453484	0.00695595	0.00537834	CCL19/MMP9/KIT/TREM2/HCLS1/GPR183/ADIPOQ/TYROBP/GPR137B/CCR1/TLR2	11
	BP	GO:0006022	aminoglycan metabolic process	10/301	172/18862	0.000454531	0.00695595	0.00537834	LUM/CHST9/UST/CHI3L1/NDNF/SDC1/CEMIP/SPOCK3/FGF2/HPSE	10
	BP	GO:0051283	negative regulation of sequestering of calcium ion	8/301	113/18862	0.000460485	0.00701574	0.00542456	ATP1A2/CCL19/THY1/CEMIP/CORO1A/FGF2/CCR5/LCK	8
	BP	GO:0006029	proteoglycan metabolic process	7/301	87/18862	0.00048279	0.00732303	0.00566216	CHST9/COL11A1/UST/NDNF/SULF1/SPOCK3/HPSE	7
	BP	GO:0051282	regulation of sequestering of calcium ion	8/301	115/18862	0.000517895	0.00775677	0.00599753	ATP1A2/CCL19/THY1/CEMIP/CORO1A/FGF2/CCR5/LCK	8
	BP	GO:0050890	cognition	13/301	276/18862	0.000519322	0.00775677	0.00599753	ATP1A2/MEIS2/C5AR1/KIT/PRKAR2B/CCL11/GPR88/HLA-DRA/PPP1R1B/LILRB2/TAC1/VLDLR/TLR2	13
	BP	GO:0048771	tissue remodeling	10/301	175/18862	0.00052066	0.00775677	0.00599753	SPP1/RAC2/CTHRC1/TMEM119/ACP5/PDK4/GREM1/TNFRSF11B/GPR137B/SYK	10
	BP	GO:0090023	positive regulation of neutrophil chemotaxis	4/301	24/18862	0.000524956	0.00775677	0.00599753	CCL19/RAC2/C5AR1/CXCL8	4
	BP	GO:0014002	astrocyte development	5/301	42/18862	0.000524962	0.00775677	0.00599753	S100A9/C5AR1/S100A8/TREM2/PLP1	5
	BP	GO:1902622	regulation of neutrophil migration	5/301	42/18862	0.000524962	0.00775677	0.00599753	SLAMF8/CCL19/RAC2/C5AR1/CXCL8	5
	BP	GO:0001764	neuron migration	9/301	145/18862	0.000543113	0.00799052	0.00617826	CXCL12/GPM6A/IGSF10/RELN/NDNF/CXCR4/NR4A2/TUBB2B/SPOCK1	9
	BP	GO:0008217	regulation of blood pressure	10/301	177/18862	0.00056903	0.00833604	0.00644542	ATP1A2/CTSG/HMOX1/CMA1/ADRB1/CPA3/ADIPOQ/ENPEP/TRHDE/TAC1	10
	BP	GO:0033690	positive regulation of osteoblast proliferation	3/301	11/18862	0.000603725	0.00880667	0.00680931	CTHRC1/TMEM119/HPSE	3
	BP	GO:0033622	integrin activation	4/301	25/18862	0.000617153	0.00896441	0.00693127	FN1/CXCL12/CXCL13/MZB1	4
	BP	GO:0072678	T cell migration	6/301	66/18862	0.000639222	0.0092458	0.00714884	CXCL16/CXCL12/GPR183/ITGA4/CXCL13/CCL5	6
	BP	GO:0051896	regulation of protein kinase B signaling	12/301	247/18862	0.000644276	0.00927974	0.00717509	CCL19/RAC2/F10/CHI3L1/KIT/KLF4/MYOC/HCLS1/BTC/FGF2/HPSE/LCK	12
	BP	GO:0051208	sequestering of calcium ion	8/301	119/18862	0.000650111	0.00932461	0.00720978	ATP1A2/CCL19/THY1/CEMIP/CORO1A/FGF2/CCR5/LCK	8
	BP	GO:0033555	multicellular organismal response to stress	6/301	67/18862	0.000692829	0.00978589	0.00756644	ATP1A2/ADRA2A/RELN/ADRB1/TAC1/NR4A2	6
	BP	GO:0050918	positive chemotaxis	6/301	67/18862	0.000692829	0.00978589	0.00756644	SCG2/CXCL12/CXCL8/CORO1A/CCL5/FGF2	6
	BP	GO:1900046	regulation of hemostasis	6/301	67/18862	0.000692829	0.00978589	0.00756644	PLAUR/PLAU/TSPAN8/COMP/HPSE/FAP	6
	BP	GO:0050871	positive regulation of B cell activation	9/301	150/18862	0.000693691	0.00978589	0.00756644	IGLC1/IGKC/IGHM/TRBC1/GPR183/IGHD/CD27/SYK/IGLL5	9
	BP	GO:0034114	regulation of heterotypic cell-cell adhesion	4/301	26/18862	0.00072027	0.0101192	0.00782416	THY1/KLF4/ADIPOQ/LCK	4
	BP	GO:1900271	regulation of long-term synaptic potentiation	5/301	45/18862	0.000725155	0.0101462	0.00784507	RELN/IGSF11/TYROBP/LILRB2/NSG1	5
	BP	GO:0006026	aminoglycan catabolic process	6/301	68/18862	0.00074985	0.0104491	0.00807925	LUM/CHI3L1/SDC1/CEMIP/FGF2/HPSE	6
	BP	GO:0006069	ethanol oxidation	3/301	12/18862	0.000795485	0.0109515	0.00846769	ALDH2/ADH1B/ALDH1A1	3
	BP	GO:0032490	detection of molecule of bacterial origin	3/301	12/18862	0.000795485	0.0109515	0.00846769	TREM2/TLR2/LY96	3
	BP	GO:0038063	collagen-activated tyrosine kinase receptor signaling pathway	3/301	12/18862	0.000795485	0.0109515	0.00846769	COL4A1/COL4A2/SYK	3
	BP	GO:0003044	regulation of systemic arterial blood pressure mediated by a chemical signal	5/301	46/18862	0.000803097	0.0109682	0.0084806	CTSG/CMA1/ADRB1/CPA3/ENPEP	5
	BP	GO:0043303	mast cell degranulation	5/301	46/18862	0.000803097	0.0109682	0.0084806	RAC2/KIT/HMOX1/PTGDS/SYK	5
	BP	GO:0010818	T cell chemotaxis	4/301	27/18862	0.000835	0.011256	0.00870311	CXCL16/GPR183/CXCL13/CCL5	4
	BP	GO:0033688	regulation of osteoblast proliferation	4/301	27/18862	0.000835	0.011256	0.00870311	CTHRC1/TMEM119/GREM1/HPSE	4
	BP	GO:0071624	positive regulation of granulocyte chemotaxis	4/301	27/18862	0.000835	0.011256	0.00870311	CCL19/RAC2/C5AR1/CXCL8	4
	BP	GO:0014065	phosphatidylinositol 3-kinase signaling	9/301	154/18862	0.000837303	0.011256	0.00870311	FN1/KIT/KLF4/MYOC/HCLS1/CCL5/HCST/FGF2/SOX9	9
	BP	GO:0051495	positive regulation of cytoskeleton organization	11/301	220/18862	0.000849008	0.0113687	0.0087903	HCK/GMFG/WASF3/STMN2/ID1/MYOC/CCL11/LPAR1/HCLS1/CORO1A/TAC1	11
	BP	GO:0042552	myelination	8/301	124/18862	0.000852331	0.0113688	0.00879037	WASF3/MYOC/LPAR1/PLP1/PLLP/CXCR4/CTSC/TLR2	8
	BP	GO:0002279	mast cell activation involved in immune response	5/301	47/18862	0.000887119	0.0116963	0.00904359	RAC2/KIT/HMOX1/PTGDS/SYK	5
	BP	GO:0002448	mast cell mediated immunity	5/301	47/18862	0.000887119	0.0116963	0.00904359	RAC2/KIT/HMOX1/PTGDS/SYK	5
	BP	GO:0120163	negative regulation of cold-induced thermogenesis	5/301	47/18862	0.000887119	0.0116963	0.00904359	ID1/ADIPOQ/ADAMTS5/ZNF423/ALDH1A1	5
	BP	GO:0002455	humoral immune response mediated by circulating immunoglobulin	9/301	156/18862	0.000917685	0.012053	0.00931934	IGLC1/C6/IGKC/IGHM/IGLV1-44/TRBC1/IGHD/C7/IGLL5	9
	BP	GO:0060191	regulation of lipase activity	7/301	97/18862	0.000927293	0.0121327	0.00938097	C5AR1/KIT/LPAR1/CCL5/FGF2/GNA15/ITK	7
	BP	GO:0007272	ensheathment of neurons	8/301	126/18862	0.000946147	0.0122203	0.00944872	WASF3/MYOC/LPAR1/PLP1/PLLP/CXCR4/CTSC/TLR2	8
	BP	GO:0008366	axon ensheathment	8/301	126/18862	0.000946147	0.0122203	0.00944872	WASF3/MYOC/LPAR1/PLP1/PLLP/CXCR4/CTSC/TLR2	8
	BP	GO:0001649	osteoblast differentiation	11/301	223/18862	0.000948249	0.0122203	0.00944872	FHL2/TNC/SPP1/IBSP/CTHRC1/TMEM119/MYOC/SFRP2/CLEC5A/GREM1/SOX9	11
	BP	GO:0045089	positive regulation of innate immune response	11/301	223/18862	0.000948249	0.0122203	0.00944872	MMP12/HCK/FCER1G/COCH/TLR8/FCN1/CCL5/MNDA/RASGRP1/TYROBP/SYK	11
	BP	GO:0007162	negative regulation of cell adhesion	13/301	295/18862	0.000961796	0.0123485	0.00954781	CXCL12/TNC/MMP12/LAPTM5/KLF4/MYOC/TGFBI/CLEC4G/NRARP/ADAMDEC1/ADIPOQ/LILRB2/SPOCK1	13
	BP	GO:0033628	regulation of cell adhesion mediated by integrin	5/301	48/18862	0.000977513	0.0125034	0.00966763	PLAU/SFRP2/CXCL13/CCL5/SYK	5
	BP	GO:0006910	phagocytosis, recognition	7/301	98/18862	0.000985243	0.0125554	0.00970786	IGLC1/IGKC/IGHM/TRBC1/IGHD/FCN1/IGLL5	7
	BP	GO:0030203	glycosaminoglycan metabolic process	9/301	158/18862	0.00100423	0.0127392	0.00984993	LUM/CHST9/UST/NDNF/SDC1/CEMIP/SPOCK3/FGF2/HPSE	9
	BP	GO:0033627	cell adhesion mediated by integrin	6/301	72/18862	0.00101502	0.0127392	0.00984993	PLAU/SFRP2/ITGA4/CXCL13/CCL5/SYK	6
	BP	GO:0048708	astrocyte differentiation	6/301	72/18862	0.00101502	0.0127392	0.00984993	S100A9/C5AR1/S100A8/TREM2/PLP1/SOX9	6
	BP	GO:0002551	mast cell chemotaxis	3/301	13/18862	0.00102196	0.0127392	0.00984993	RAC2/KIT/CCL11	3
	BP	GO:0032725	positive regulation of granulocyte macrophage colony-stimulating factor production	3/301	13/18862	0.00102196	0.0127392	0.00984993	RASGRP1/IL17D/SYK	3
	BP	GO:0070486	leukocyte aggregation	3/301	13/18862	0.00102196	0.0127392	0.00984993	S100A9/RAC2/S100A8	3
	BP	GO:0071622	regulation of granulocyte chemotaxis	5/301	49/18862	0.00107457	0.0132983	0.0102822	CCL19/RAC2/C5AR1/CXCL8/CCL5	5
	BP	GO:1900047	negative regulation of hemostasis	5/301	49/18862	0.00107457	0.0132983	0.0102822	PLAUR/PLAU/TSPAN8/COMP/FAP	5
	BP	GO:0014072	response to isoquinoline alkaloid	4/301	29/18862	0.00110207	0.0134925	0.0104324	PPP1R1B/CXCR4/TAC1/FOSB	4
	BP	GO:0043278	response to morphine	4/301	29/18862	0.00110207	0.0134925	0.0104324	PPP1R1B/CXCR4/TAC1/FOSB	4
	BP	GO:1902624	positive regulation of neutrophil migration	4/301	29/18862	0.00110207	0.0134925	0.0104324	CCL19/RAC2/C5AR1/CXCL8	4
	BP	GO:0007612	learning	8/301	130/18862	0.00115857	0.0141337	0.0109281	ATP1A2/MEIS2/KIT/PRKAR2B/GPR88/PPP1R1B/TAC1/TLR2	8
	BP	GO:0007566	embryo implantation	5/301	50/18862	0.0011786	0.0143271	0.0110777	SPP1/MMP9/VMP1/APELA/STC1	5
	BP	GO:0061041	regulation of wound healing	8/301	131/18862	0.0012172	0.014744	0.0114001	PLAUR/PLAU/ADRA2A/TSPAN8/CXCR4/FGF2/HPSE/FAP	8
	BP	GO:2000406	positive regulation of T cell migration	4/301	30/18862	0.0012558	0.0151581	0.0117202	CXCL12/ITGA4/CXCL13/CCL5	4
	BP	GO:0050930	induction of positive chemotaxis	3/301	14/18862	0.00128538	0.0154066	0.0119124	SCG2/CXCL12/CXCL8	3
	BP	GO:0097531	mast cell migration	3/301	14/18862	0.00128538	0.0154066	0.0119124	RAC2/KIT/CCL11	3
	BP	GO:0043277	apoptotic cell clearance	5/301	51/18862	0.00128989	0.0154067	0.0119125	RAC2/XKR4/TREM2/FCN1/TYROBP	5
	BP	GO:0002062	chondrocyte differentiation	7/301	103/18862	0.00131909	0.0156465	0.0120979	COL11A1/SULF1/TGFBI/SFRP2/GREM1/SOX9/COMP	7
	BP	GO:0002495	antigen processing and presentation of peptide antigen via MHC class II	7/301	103/18862	0.00131909	0.0156465	0.0120979	FCER1G/TREM2/HLA-DMA/HLA-DPA1/HLA-DRA/HLA-DMB/CTSS	7
	BP	GO:0097305	response to alcohol	11/301	233/18862	0.00135083	0.0159677	0.0123462	TNC/CCL19/S100A8/VCAM1/KLF4/ADIPOQ/CD27/CCR5/CA3/CD14/FOSB	11
	BP	GO:0002504	antigen processing and presentation of peptide or polysaccharide antigen via MHC class II	7/301	104/18862	0.00139536	0.0164375	0.0127094	FCER1G/TREM2/HLA-DMA/HLA-DPA1/HLA-DRA/HLA-DMB/CTSS	7
	BP	GO:0097553	calcium ion transmembrane import into cytosol	8/301	134/18862	0.00140742	0.0165227	0.0127753	ATP1A2/CCL19/THY1/CEMIP/CORO1A/FGF2/CCR5/LCK	8
	BP	GO:0010644	cell communication by electrical coupling	4/301	31/18862	0.00142392	0.0166594	0.012881	ATP1A2/ATP1B1/PKP2/GJB2	4
	BP	GO:0007611	learning or memory	11/301	235/18862	0.00144615	0.0168619	0.0130376	ATP1A2/MEIS2/KIT/PRKAR2B/CCL11/GPR88/PPP1R1B/LILRB2/TAC1/VLDLR/TLR2	11
	BP	GO:0051384	response to glucocorticoid	8/301	135/18862	0.00147582	0.0171495	0.01326	GPR83/SDC1/ANXA3/GJB2/ADIPOQ/STC1/IGFBP2/FOSB	8
	BP	GO:0010975	regulation of neuron projection development	16/301	428/18862	0.0014995	0.0173658	0.0134272	FN1/CXCL12/S100A9/SPP1/THY1/UST/RELN/CHODL/STMN2/KLF4/ID1/NDNF/SFRP2/LPAR1/VLDLR/SPOCK1	16
	BP	GO:0043112	receptor metabolic process	9/301	168/18862	0.00154172	0.0177367	0.013714	LAPTM5/FCER1G/GPRASP1/APELA/CXCL8/GREM1/VLDLR/NSG1/SYK	9
	BP	GO:0032970	regulation of actin filament-based process	15/301	389/18862	0.00154608	0.0177367	0.013714	CXCL12/ATP1A2/RAC2/HCK/GMFG/WASF3/ID1/MYOC/PKP2/CCL11/LPAR1/HCLS1/CORO1A/STC1/TAC1	15
	BP	GO:0071902	positive regulation of protein serine/threonine kinase activity	13/301	311/18862	0.00154705	0.0177367	0.013714	CAB39L/CCL19/C5AR1/ADRA2A/FAM20A/KIT/LPAR1/CEMIP/ADIPOQ/RASGRP1/CXCR4/FGF2/SYK	13
	BP	GO:1901222	regulation of NIK/NF-kappaB signaling	7/301	106/18862	0.00155821	0.0178051	0.0137669	CCL19/LAPTM5/TREM2/GREM1/CD27/TLR2/CD14	7
	BP	GO:0003417	growth plate cartilage development	3/301	15/18862	0.00158784	0.017887	0.0138302	STC1/SOX9/COMP	3
	BP	GO:0032645	regulation of granulocyte macrophage colony-stimulating factor production	3/301	15/18862	0.00158784	0.017887	0.0138302	RASGRP1/IL17D/SYK	3
	BP	GO:0038065	collagen-activated signaling pathway	3/301	15/18862	0.00158784	0.017887	0.0138302	COL4A1/COL4A2/SYK	3
	BP	GO:0007202	activation of phospholipase C activity	4/301	32/18862	0.00160711	0.017887	0.0138302	C5AR1/LPAR1/GNA15/ITK	4
	BP	GO:0016486	peptide hormone processing	4/301	32/18862	0.00160711	0.017887	0.0138302	CTSG/CMA1/CPA3/ENPEP	4
	BP	GO:0033687	osteoblast proliferation	4/301	32/18862	0.00160711	0.017887	0.0138302	CTHRC1/TMEM119/GREM1/HPSE	4
	BP	GO:0050974	detection of mechanical stimulus involved in sensory perception	4/301	32/18862	0.00160711	0.017887	0.0138302	CXCL12/COL11A1/KIT/CXCR4	4
	BP	GO:0090022	regulation of neutrophil chemotaxis	4/301	32/18862	0.00160711	0.017887	0.0138302	CCL19/RAC2/C5AR1/CXCL8	4
	BP	GO:1902905	positive regulation of supramolecular fiber organization	10/301	203/18862	0.00161521	0.0179189	0.0138549	HCK/GMFG/WASF3/STMN2/ID1/MYOC/CCL11/LPAR1/CORO1A/TAC1	10
	BP	GO:0030183	B cell differentiation	8/301	137/18862	0.00162052	0.0179198	0.0138556	ITM2A/SLAMF8/VCAM1/KIT/GPR183/ITGA4/CD27/SYK	8
	BP	GO:0002526	acute inflammatory response	7/301	107/18862	0.00164499	0.0181319	0.0140196	FN1/TREM1/S100A8/VCAM1/HPR/SERPINA1/TAC1	7
	BP	GO:0010038	response to metal ion	14/301	352/18862	0.00165058	0.0181352	0.0140221	MMP9/S100A8/VCAM1/FBP1/KIT/HMOX1/SDC1/AQP9/OTC/TNFRSF11B/KRT14/IGFBP2/CD14/FOSB	14
	BP	GO:0055078	sodium ion homeostasis	5/301	54/18862	0.00167042	0.0182946	0.0141454	ATP1A2/ATP1B1/SCN7A/C7/TAC1	5
	BP	GO:0045088	regulation of innate immune response	13/301	315/18862	0.00173234	0.0189123	0.014623	SLAMF8/MMP12/HCK/FCER1G/COCH/TREM2/TLR8/FCN1/CCL5/MNDA/RASGRP1/TYROBP/SYK	13
	BP	GO:2000106	regulation of leukocyte apoptotic process	6/301	80/18862	0.00175588	0.0191084	0.0147746	CXCL12/CCL19/HCLS1/CCL5/IL7R/CD27	6
	BP	GO:0140448	signaling receptor ligand precursor processing	4/301	33/18862	0.00180607	0.0195924	0.0151489	CTSG/CMA1/CPA3/ENPEP	4
	BP	GO:0034764	positive regulation of transmembrane transport	10/301	207/18862	0.00186562	0.0201112	0.0155499	THY1/WNK3/ATP1B1/RELN/CEMIP/ITLN1/TREM2/PLP1/ADIPOQ/CTSS	10
	BP	GO:0034767	positive regulation of ion transmembrane transport	10/301	207/18862	0.00186562	0.0201112	0.0155499	THY1/WNK3/ATP1B1/RELN/CEMIP/ITLN1/TREM2/PLP1/ADIPOQ/CTSS	10
	BP	GO:0061138	morphogenesis of a branching epithelium	9/301	173/18862	0.00188607	0.0202678	0.0156711	TNC/COL4A1/SULF1/CCL11/SFRP2/NRARP/GREM1/FGF2/SOX9	9
	BP	GO:0032604	granulocyte macrophage colony-stimulating factor production	3/301	16/18862	0.00193132	0.0205608	0.0158976	RASGRP1/IL17D/SYK	3
	BP	GO:0045779	negative regulation of bone resorption	3/301	16/18862	0.00193132	0.0205608	0.0158976	TMEM119/TNFRSF11B/GPR137B	3
	BP	GO:0097067	cellular response to thyroid hormone stimulus	3/301	16/18862	0.00193132	0.0205608	0.0158976	CTSB/KIT/CTSS	3
	BP	GO:1904064	positive regulation of cation transmembrane transport	8/301	141/18862	0.00194355	0.0206269	0.0159487	THY1/WNK3/ATP1B1/RELN/CEMIP/TREM2/PLP1/CTSS	8
	BP	GO:0060760	positive regulation of response to cytokine stimulus	5/301	56/18862	0.0019661	0.0208018	0.0160839	MMP12/LAPTM5/TREM2/CXCR4/TLR2	5
	BP	GO:0042493	response to drug	14/301	359/18862	0.00198015	0.020886	0.016149	SLAMF8/TDO2/FBP1/PRKAR2B/HMOX1/SFRP2/TIMP4/OTC/TNFRSF11B/ADIPOQ/CXCR4/IGFBP2/LCK/FOSB	14
	BP	GO:0051651	maintenance of location in cell	10/301	209/18862	0.0020021	0.0210527	0.016278	S100A9/ATP1A2/CCL19/S100A8/THY1/CEMIP/CORO1A/FGF2/CCR5/LCK	10
	BP	GO:0002691	regulation of cellular extravasation	4/301	34/18862	0.00202147	0.0211915	0.0163852	CXCL12/THY1/PLVAP/ITGA4	4
	BP	GO:0045619	regulation of lymphocyte differentiation	9/301	175/18862	0.00203993	0.0213197	0.0164844	SLAMF8/CCL19/CD2/NRARP/IL7R/CD27/HLA-DRA/LILRB2/SYK	9
	BP	GO:0048754	branching morphogenesis of an epithelial tube	8/301	143/18862	0.00212304	0.0221209	0.0171039	TNC/COL4A1/CCL11/SFRP2/NRARP/GREM1/FGF2/SOX9	8
	BP	GO:0001936	regulation of endothelial cell proliferation	9/301	177/18862	0.00220364	0.0228911	0.0176994	SCG2/CXCL12/HMOX1/SULF1/APELA/CCL11/NRARP/ITGA4/FGF2	9
	BP	GO:0002755	MyD88-dependent toll-like receptor signaling pathway	4/301	35/18862	0.00225399	0.0232732	0.0179948	TLR8/TLR2/CD14/LY96	4
	BP	GO:0018149	peptide cross-linking	4/301	35/18862	0.00225399	0.0232732	0.0179948	FN1/NDNF/SPOCK3/CSTA	4
	BP	GO:0031102	neuron projection regeneration	5/301	58/18862	0.0022983	0.0236594	0.0182934	TNC/SPP1/THY1/KLF4/GAP43	5
	BP	GO:0033631	cell-cell adhesion mediated by integrin	3/301	17/18862	0.00231766	0.0237873	0.0183923	ITGA4/CXCL13/CCL5	3
	BP	GO:0034109	homotypic cell-cell adhesion	6/301	85/18862	0.00239203	0.0244773	0.0189258	FN1/PLAUR/PKP2/CCL5/COMP/SYK	6
	BP	GO:0045580	regulation of T cell differentiation	8/301	146/18862	0.00241645	0.0246535	0.0190621	CCL19/CD2/NRARP/IL7R/CD27/HLA-DRA/LILRB2/SYK	8
	BP	GO:0071347	cellular response to interleukin-1	9/301	180/18862	0.00246865	0.0251114	0.0194161	CCL19/CHI3L1/CCL18/CCL8/CCL11/CXCL8/CCL5/CCL4/SOX9	9
	BP	GO:1903510	mucopolysaccharide metabolic process	7/301	115/18862	0.00248212	0.0251737	0.0194643	LUM/CHST9/UST/NDNF/CEMIP/SPOCK3/FGF2	7
	BP	GO:0001990	regulation of systemic arterial blood pressure by hormone	4/301	36/18862	0.0025043	0.0252492	0.0195227	CTSG/CMA1/CPA3/ENPEP	4
	BP	GO:0045730	respiratory burst	4/301	36/18862	0.0025043	0.0252492	0.0195227	SLAMF8/RAC2/HCK/CD52	4
	BP	GO:0032755	positive regulation of interleukin-6 production	6/301	86/18862	0.00253769	0.0255108	0.0197249	TLR8/TYROBP/LILRB2/TLR2/IL17D/SYK	6
	BP	GO:0032615	interleukin-12 production	5/301	60/18862	0.00266956	0.0265254	0.0205094	CCL19/LAPTM5/TLR8/TLR2/SYK	5
	BP	GO:0032655	regulation of interleukin-12 production	5/301	60/18862	0.00266956	0.0265254	0.0205094	CCL19/LAPTM5/TLR8/TLR2/SYK	5
	BP	GO:0045576	mast cell activation	5/301	60/18862	0.00266956	0.0265254	0.0205094	RAC2/KIT/HMOX1/PTGDS/SYK	5
	BP	GO:0061098	positive regulation of protein tyrosine kinase activity	5/301	60/18862	0.00266956	0.0265254	0.0205094	ADRA2A/RELN/GREM1/CCL5/BTC	5
	BP	GO:0050808	synapse organization	15/301	412/18862	0.00268408	0.0265925	0.0205613	GPM6A/TNC/C5AR1/COL4A1/WASF3/RELN/GAP43/TREM2/LRFN5/IGSF21/PCDH17/CLSTN2/CTTNBP2/LILRB2/TLR2	15
	BP	GO:0010810	regulation of cell-substrate adhesion	10/301	218/18862	0.00271942	0.026865	0.020772	FN1/MMP12/RAC2/PLAU/THY1/NDNF/MYOC/GREM1/VIT/SPOCK1	10
	BP	GO:0002281	macrophage activation involved in immune response	3/301	18/18862	0.00274859	0.0269205	0.0208149	TREM2/TYROBP/SYK	3
	BP	GO:0002523	leukocyte migration involved in inflammatory response	3/301	18/18862	0.00274859	0.0269205	0.0208149	S100A9/SLAMF8/S100A8	3
	BP	GO:0032026	response to magnesium ion	3/301	18/18862	0.00274859	0.0269205	0.0208149	FBP1/TNFRSF11B/CD14	3
	BP	GO:0002699	positive regulation of immune effector process	10/301	219/18862	0.0028104	0.0274474	0.0212223	CCL19/RAC2/LAPTM5/HMOX1/HLA-DRA/RASGRP1/MZB1/TYROBP/HLA-DMB/SYK	10
	BP	GO:0045582	positive regulation of T cell differentiation	6/301	88/18862	0.00284886	0.0276654	0.0213909	CCL19/IL7R/CD27/HLA-DRA/LILRB2/SYK	6
	BP	GO:0070664	negative regulation of leukocyte proliferation	6/301	88/18862	0.00284886	0.0276654	0.0213909	CCL8/CLEC4G/GREM1/MNDA/TYROBP/LILRB2	6
	BP	GO:0050678	regulation of epithelial cell proliferation	14/301	374/18862	0.0028723	0.0278143	0.021506	SCG2/CXCL12/MMP12/C5AR1/HMOX1/ID1/SULF1/APELA/CCL11/SFRP2/NRARP/ITGA4/FGF2/SOX9	14
	BP	GO:0032642	regulation of chemokine production	6/301	89/18862	0.00301475	0.0291114	0.0225089	HMOX1/KLF4/TREM2/ADIPOQ/TLR2/SYK	6
	BP	GO:0009595	detection of biotic stimulus	4/301	38/18862	0.00306091	0.0294741	0.0227894	TREM2/TLR2/FAP/LY96	4
	BP	GO:0001763	morphogenesis of a branching structure	9/301	186/18862	0.00307437	0.0295003	0.0228096	TNC/COL4A1/SULF1/CCL11/SFRP2/NRARP/GREM1/FGF2/SOX9	9
	BP	GO:0006027	glycosaminoglycan catabolic process	5/301	62/18862	0.00308244	0.0295003	0.0228096	LUM/SDC1/CEMIP/FGF2/HPSE	5
	BP	GO:0031960	response to corticosteroid	8/301	152/18862	0.00309805	0.0295003	0.0228096	GPR83/SDC1/ANXA3/GJB2/ADIPOQ/STC1/IGFBP2/FOSB	8
	BP	GO:0060402	calcium ion transport into cytosol	8/301	152/18862	0.00309805	0.0295003	0.0228096	ATP1A2/CCL19/THY1/CEMIP/CORO1A/FGF2/CCR5/LCK	8
	BP	GO:0060349	bone morphogenesis	6/301	90/18862	0.00318774	0.0301867	0.0233403	TMEM119/SFRP2/STC1/MMP13/SOX9/COMP	6
	BP	GO:1903035	negative regulation of response to wounding	6/301	90/18862	0.00318774	0.0301867	0.0233403	PLAUR/SPP1/PLAU/TSPAN8/FGF2/FAP	6
	BP	GO:0002831	regulation of response to biotic stimulus	15/301	420/18862	0.00321454	0.0302953	0.0234243	SLAMF8/MMP12/HCK/FCER1G/COCH/LY86/TREM2/TLR8/FCN1/CCL5/MNDA/RASGRP1/TYROBP/SYK/LY96	15
	BP	GO:0006883	cellular sodium ion homeostasis	3/301	19/18862	0.00322572	0.0302953	0.0234243	ATP1A2/ATP1B1/C7	3
	BP	GO:0043652	engulfment of apoptotic cell	3/301	19/18862	0.00322572	0.0302953	0.0234243	RAC2/XKR4/TREM2	3
	BP	GO:2000401	regulation of lymphocyte migration	5/301	63/18862	0.00330528	0.0309577	0.0239364	CXCL12/ITGA4/CXCL13/CCL5/CCL4	5
	BP	GO:0045742	positive regulation of epidermal growth factor receptor signaling pathway	4/301	39/18862	0.0033685	0.0313783	0.0242617	PLAUR/MMP9/ADRA2A/BTC	4
	BP	GO:1905521	regulation of macrophage migration	4/301	39/18862	0.0033685	0.0313783	0.0242617	SLAMF8/C5AR1/TREM2/CCL5	4
	BP	GO:0060759	regulation of response to cytokine stimulus	9/301	189/18862	0.00341827	0.0317556	0.0245534	MMP12/LAPTM5/KLF4/TREM2/CCL5/ADIPOQ/CXCR4/TLR2/SYK	9
	BP	GO:0032732	positive regulation of interleukin-1 production	5/301	64/18862	0.00353948	0.0327928	0.0253554	CCL19/TLR8/IGHD/MNDA/TYROBP	5
	BP	GO:0034329	cell junction assembly	15/301	425/18862	0.00358787	0.0331515	0.0256327	FN1/GPM6A/THY1/MYOC/VMP1/GAP43/PKP2/GREM1/GJB2/LRFN5/PCDH17/CLSTN2/KRT14/CDH19/TLR2	15
	BP	GO:0001935	endothelial cell proliferation	9/301	191/18862	0.00366385	0.0335034	0.0259048	SCG2/CXCL12/HMOX1/SULF1/APELA/CCL11/NRARP/ITGA4/FGF2	9
	BP	GO:0070588	calcium ion transmembrane transport	12/301	304/18862	0.00368749	0.0335034	0.0259048	GPM6A/ATP1A2/CCL19/THY1/ATP1B1/ADRA2A/CEMIP/CORO1A/PLP1/FGF2/CCR5/LCK	12
	BP	GO:0032735	positive regulation of interleukin-12 production	4/301	40/18862	0.00369647	0.0335034	0.0259048	CCL19/LAPTM5/TLR2/SYK	4
	BP	GO:0031346	positive regulation of cell projection organization	13/301	344/18862	0.00370008	0.0335034	0.0259048	FN1/CXCL12/GPM6A/S100A9/CCL19/RAC2/KIT/RELN/CHODL/STMN2/NDNF/ENPP2/VLDLR	13
	BP	GO:0002577	regulation of antigen processing and presentation	3/301	20/18862	0.00375055	0.0335034	0.0259048	CCL19/TREM2/LILRB2	3
	BP	GO:0035988	chondrocyte proliferation	3/301	20/18862	0.00375055	0.0335034	0.0259048	STC1/SOX9/COMP	3
	BP	GO:0046697	decidualization	3/301	20/18862	0.00375055	0.0335034	0.0259048	SPP1/GJB2/STC1	3
	BP	GO:0070233	negative regulation of T cell apoptotic process	3/301	20/18862	0.00375055	0.0335034	0.0259048	CCL5/IL7R/CD27	3
	BP	GO:0140131	positive regulation of lymphocyte chemotaxis	3/301	20/18862	0.00375055	0.0335034	0.0259048	CXCL13/CCL5/CCL4	3
	BP	GO:0048709	oligodendrocyte differentiation	6/301	93/18862	0.00375127	0.0335034	0.0259048	WASF3/LPAR1/PLP1/CXCR4/TLR2/SOX9	6
	BP	GO:0002224	toll-like receptor signaling pathway	8/301	157/18862	0.00377302	0.0335034	0.0259048	S100A9/CTSB/S100A8/TLR8/TLR2/CD14/CTSS/LY96	8
	BP	GO:0030168	platelet activation	8/301	157/18862	0.00377302	0.0335034	0.0259048	FN1/VWF/FCER1G/ADRA2A/COMP/GNA15/LCK/SYK	8
	BP	GO:0032729	positive regulation of interferon-gamma production	5/301	65/18862	0.00378537	0.0335034	0.0259048	CD2/TLR8/HLA-DPA1/RASGRP1/CD14	5
	BP	GO:2000146	negative regulation of cell motility	13/301	345/18862	0.00379139	0.0335034	0.0259048	CXCL12/SLAMF8/THY1/HMOX1/KLF4/SULF1/SFRP2/GREM1/CXCL13/ADIPOQ/STC1/SPOCK3/FGF2	13
	BP	GO:0031099	regeneration	9/301	192/18862	0.00379172	0.0335034	0.0259048	CXCL12/TNC/SPP1/C5AR1/THY1/HMOX1/KLF4/GAP43/ANXA3	9
	BP	GO:0048015	phosphatidylinositol-mediated signaling	9/301	192/18862	0.00379172	0.0335034	0.0259048	FN1/KIT/KLF4/MYOC/HCLS1/CCL5/HCST/FGF2/SOX9	9
	BP	GO:0016049	cell growth	16/301	470/18862	0.00379211	0.0335034	0.0259048	CXCL16/FN1/CXCL12/S100A9/SPP1/S100A8/FBP1/NANOS1/SFRP2/IGFBP4/GREM1/ITGA4/CXCR4/SOX9/SPOCK1/RPS6KA1	16
	BP	GO:0050764	regulation of phagocytosis	6/301	94/18862	0.00395458	0.0347598	0.0268762	HCK/FCER1G/TREM2/ADIPOQ/TLR2/SYK	6
	BP	GO:0061097	regulation of protein tyrosine kinase activity	6/301	94/18862	0.00395458	0.0347598	0.0268762	THY1/ADRA2A/RELN/GREM1/CCL5/BTC	6
	BP	GO:0030193	regulation of blood coagulation	5/301	66/18862	0.00404325	0.035377	0.0273534	PLAUR/PLAU/TSPAN8/HPSE/FAP	5
	BP	GO:1901186	positive regulation of ERBB signaling pathway	4/301	41/18862	0.00404544	0.035377	0.0273534	PLAUR/MMP9/ADRA2A/BTC	4
	BP	GO:0045471	response to ethanol	7/301	126/18862	0.00412705	0.0359988	0.0278343	TNC/S100A8/VCAM1/ADIPOQ/CD27/CA3/CD14	7
	BP	GO:0031214	biomineral tissue development	8/301	160/18862	0.00422938	0.0367115	0.0283853	SPP1/IBSP/TMEM119/FAM20A/GREM1/CCR1/SOX9/COMP	8
	BP	GO:0008037	cell recognition	10/301	232/18862	0.00423017	0.0367115	0.0283853	CCL19/IGLC1/IGKC/GAP43/IGHM/TRBC1/IGHD/FCN1/CXCR4/IGLL5	10
	BP	GO:0050848	regulation of calcium-mediated signaling	5/301	67/18862	0.00431344	0.0372469	0.0287993	FHL2/TMEM100/TREM2/CCL4/SYK	5
	BP	GO:0030502	negative regulation of bone mineralization	3/301	21/18862	0.00432447	0.0372469	0.0287993	GREM1/CCR1/SOX9	3
	BP	GO:0061042	vascular wound healing	3/301	21/18862	0.00432447	0.0372469	0.0287993	NDNF/CXCR4/HPSE	3
	BP	GO:0048017	inositol lipid-mediated signaling	9/301	196/18862	0.00433858	0.0372749	0.0288209	FN1/KIT/KLF4/MYOC/HCLS1/CCL5/HCST/FGF2/SOX9	9
	BP	GO:0042100	B cell proliferation	6/301	96/18862	0.00438553	0.0374401	0.0289487	GPR183/MNDA/IL7R/RASGRP1/MZB1/TYROBP	6
	BP	GO:0030307	positive regulation of cell growth	8/301	161/18862	0.00439059	0.0374401	0.0289487	CXCL16/FN1/CXCL12/S100A9/S100A8/SFRP2/CXCR4/RPS6KA1	8
	BP	GO:0055067	monovalent inorganic cation homeostasis	8/301	161/18862	0.00439059	0.0374401	0.0289487	SLAMF8/ATP1A2/ATP1B1/SCN7A/OTC/PDK4/C7/TAC1	8
	BP	GO:0008542	visual learning	4/301	42/18862	0.00441602	0.0375636	0.0290441	ATP1A2/MEIS2/KIT/PPP1R1B	4
	BP	GO:0051271	negative regulation of cellular component movement	13/301	352/18862	0.00448302	0.0380169	0.0293947	CXCL12/SLAMF8/THY1/HMOX1/KLF4/SULF1/SFRP2/GREM1/CXCL13/ADIPOQ/STC1/SPOCK3/FGF2	13
	BP	GO:0019882	antigen processing and presentation	10/301	234/18862	0.0044915	0.0380169	0.0293947	CCL19/FCER1G/TREM2/HLA-DMA/FCGR1B/HLA-DPA1/HLA-DRA/LILRB2/HLA-DMB/CTSS	10
	BP	GO:0032102	negative regulation of response to external stimulus	14/301	394/18862	0.00455139	0.0383774	0.0296734	PLAUR/SLAMF8/MMP12/SPP1/PLAU/KLF4/TSPAN8/TNFAIP6/GREM1/CXCL13/LRFN5/ADIPOQ/FGF2/FAP	14
	BP	GO:0110148	biomineralization	8/301	162/18862	0.00455648	0.0383774	0.0296734	SPP1/IBSP/TMEM119/FAM20A/GREM1/CCR1/SOX9/COMP	8
	BP	GO:0110053	regulation of actin filament organization	11/301	273/18862	0.00458286	0.0384799	0.0297526	CXCL12/HCK/GMFG/WASF3/ID1/MYOC/CCL11/LPAR1/HCLS1/CORO1A/TAC1	11
	BP	GO:0008306	associative learning	5/301	68/18862	0.00459627	0.0384799	0.0297526	ATP1A2/MEIS2/KIT/PPP1R1B/TAC1	5
	BP	GO:0045807	positive regulation of endocytosis	6/301	97/18862	0.00461354	0.0384799	0.0297526	CCL19/APELA/TREM2/GREM1/CD14/SYK	6
	BP	GO:0120162	positive regulation of cold-induced thermogenesis	6/301	97/18862	0.00461354	0.0384799	0.0297526	ADRB1/PLAC8/ACADL/ADIPOQ/CXCR4/SYK	6
	BP	GO:0014003	oligodendrocyte development	4/301	43/18862	0.0048088	0.0397219	0.0307129	WASF3/LPAR1/PLP1/TLR2	4
	BP	GO:0035094	response to nicotine	4/301	43/18862	0.0048088	0.0397219	0.0307129	ATP1A2/VCAM1/HMOX1/PPP1R1B	4
	BP	GO:2000273	positive regulation of signaling receptor activity	4/301	43/18862	0.0048088	0.0397219	0.0307129	ADRA2A/RELN/GREM1/BTC	4
	BP	GO:2000404	regulation of T cell migration	4/301	43/18862	0.0048088	0.0397219	0.0307129	CXCL12/ITGA4/CXCL13/CCL5	4
	BP	GO:0050830	defense response to Gram-positive bacterium	6/301	98/18862	0.00485017	0.0399673	0.0309027	C5AR1/CTSG/RNASE6/LYZ/IL7R/TLR2	6
	BP	GO:0006067	ethanol metabolic process	3/301	22/18862	0.00494877	0.0406819	0.0314552	ALDH2/ADH1B/ALDH1A1	3
	BP	GO:0019886	antigen processing and presentation of exogenous peptide antigen via MHC class II	6/301	99/18862	0.0050956	0.0417888	0.0323111	FCER1G/HLA-DMA/HLA-DPA1/HLA-DRA/HLA-DMB/CTSS	6
	BP	GO:0045123	cellular extravasation	5/301	70/18862	0.00520106	0.0425519	0.0329011	CXCL12/THY1/VCAM1/PLVAP/ITGA4	5
	BP	GO:0001654	eye development	13/301	359/18862	0.00527301	0.0430378	0.0332768	GPM6A/MEIS2/COL5A2/THY1/ANGPTL7/COL4A1/COL5A1/KLF4/NDP/CHRDL1/CPAMD8/FGF2/SOX9	13
	BP	GO:0051090	regulation of DNA-binding transcription factor activity	15/301	444/18862	0.00534503	0.043522	0.0336512	S100A9/HCK/S100A8/KIT/HMOX1/RELN/KLF4/NDP/ID1/HCLS1/ANXA3/GREM1/TLR2/BEX1/SYK	15
	BP	GO:0071772	response to BMP	8/301	167/18862	0.00545935	0.0442427	0.0342084	SULF1/SFRP2/TMEM100/CHRDL1/GREM1/ZNF423/SOX9/COMP	8
	BP	GO:0071773	cellular response to BMP stimulus	8/301	167/18862	0.00545935	0.0442427	0.0342084	SULF1/SFRP2/TMEM100/CHRDL1/GREM1/ZNF423/SOX9/COMP	8
	BP	GO:0001655	urogenital system development	12/301	320/18862	0.00551944	0.0445531	0.0344484	COL4A4/TNC/MMP9/COL4A1/SULF1/SDC1/CRLF1/GREM1/ADIPOQ/ENPEP/FGF2/SOX9	12
	BP	GO:0050818	regulation of coagulation	5/301	71/18862	0.00552365	0.0445531	0.0344484	PLAUR/PLAU/TSPAN8/HPSE/FAP	5
	BP	GO:0050729	positive regulation of inflammatory response	7/301	133/18862	0.00553693	0.0445554	0.0344502	S100A9/S100A8/TREM2/PLA2G7/TAC1/CTSC/TLR2	7
	BP	GO:0045621	positive regulation of lymphocyte differentiation	6/301	101/18862	0.00561362	0.0446325	0.0345098	CCL19/IL7R/CD27/HLA-DRA/LILRB2/SYK	6
	BP	GO:0044706	multi-multicellular organism process	9/301	204/18862	0.00561562	0.0446325	0.0345098	SPP1/MMP9/VMP1/APELA/GJB2/STC1/TAC1/IGFBP2/FOSB	9
	BP	GO:0050852	T cell receptor signaling pathway	9/301	204/18862	0.00561562	0.0446325	0.0345098	THEMIS2/LAPTM5/THY1/TRBC1/HLA-DPA1/HLA-DRA/CD3D/ITK/LCK	9
	BP	GO:0003416	endochondral bone growth	3/301	23/18862	0.00562463	0.0446325	0.0345098	STC1/SOX9/COMP	3
	BP	GO:0060384	innervation	3/301	23/18862	0.00562463	0.0446325	0.0345098	VCAM1/SULF1/ITGA4	3
	BP	GO:0097066	response to thyroid hormone	3/301	23/18862	0.00562463	0.0446325	0.0345098	CTSB/KIT/CTSS	3
	BP	GO:0050804	modulation of chemical synaptic transmission	14/301	405/18862	0.00576986	0.0455932	0.0352526	ATP1A2/ADRA2A/KIT/PRKAR2B/RELN/IGSF11/ADIPOQ/PCDH17/CLSTN2/TYROBP/LILRB2/TAC1/TUBB2B/NSG1	14
	BP	GO:0150063	visual system development	13/301	363/18862	0.0057723	0.0455932	0.0352526	GPM6A/MEIS2/COL5A2/THY1/ANGPTL7/COL4A1/COL5A1/KLF4/NDP/CHRDL1/CPAMD8/FGF2/SOX9	13
	BP	GO:0071900	regulation of protein serine/threonine kinase activity	16/301	492/18862	0.00584254	0.0460419	0.0355996	CAB39L/CCL19/C5AR1/THY1/ADRA2A/FAM20A/KIT/PRKAR2B/SFRP2/LPAR1/CEMIP/ADIPOQ/RASGRP1/CXCR4/FGF2/SYK	16
	BP	GO:0071887	leukocyte apoptotic process	6/301	102/18862	0.00588659	0.0461177	0.0356581	CXCL12/CCL19/HCLS1/CCL5/IL7R/CD27	6
	BP	GO:0001558	regulation of cell growth	14/301	406/18862	0.00589251	0.0461177	0.0356581	CXCL16/FN1/CXCL12/S100A9/SPP1/S100A8/FBP1/NANOS1/SFRP2/IGFBP4/GREM1/CXCR4/SPOCK1/RPS6KA1	14
	BP	GO:0099177	regulation of trans-synaptic signaling	14/301	406/18862	0.00589251	0.0461177	0.0356581	ATP1A2/ADRA2A/KIT/PRKAR2B/RELN/IGSF11/ADIPOQ/PCDH17/CLSTN2/TYROBP/LILRB2/TAC1/TUBB2B/NSG1	14
	BP	GO:0090066	regulation of anatomical structure size	16/301	493/18862	0.00595373	0.0464906	0.0359465	FN1/CXCL12/ATP1A2/SPP1/HCK/GMFG/WNK3/ADRA2A/WASF3/ADRB1/SMTNL2/CCL11/HCLS1/CORO1A/IL7R/COMP	16
	BP	GO:0070555	response to interleukin-1	9/301	206/18862	0.00597618	0.0465599	0.036	CCL19/CHI3L1/CCL18/CCL8/CCL11/CXCL8/CCL5/CCL4/SOX9	9
	BP	GO:0001508	action potential	7/301	135/18862	0.00599909	0.0466323	0.0360561	ATP1A2/ATP1B1/SCN7A/PKP2/GPR88/TAC1/GNA15	7
	BP	GO:0002686	negative regulation of leukocyte migration	4/301	46/18862	0.00612621	0.0474055	0.0366539	CXCL12/SLAMF8/HMOX1/GREM1	4
	BP	GO:0043268	positive regulation of potassium ion transport	4/301	46/18862	0.00612621	0.0474055	0.0366539	WNK3/ATP1B1/ADRA2A/TREM2	4
	BP	GO:0032526	response to retinoic acid	6/301	103/18862	0.00616912	0.0476301	0.0368275	TNC/KLF4/GJB2/IGFBP2/SOX9/BRINP3	6
	BP	GO:0086064	cell communication by electrical coupling involved in cardiac conduction	3/301	24/18862	0.00635316	0.048622	0.0375945	ATP1A2/ATP1B1/PKP2	3
	BP	GO:0098581	detection of external biotic stimulus	3/301	24/18862	0.00635316	0.048622	0.0375945	TREM2/TLR2/LY96	3
	BP	GO:1905523	positive regulation of macrophage migration	3/301	24/18862	0.00635316	0.048622	0.0375945	C5AR1/TREM2/CCL5	3
	BP	GO:0002221	pattern recognition receptor signaling pathway	9/301	208/18862	0.00635433	0.048622	0.0375945	S100A9/CTSB/S100A8/TLR8/FCN1/TLR2/CD14/CTSS/LY96	9
	BP	GO:0032418	lysosome localization	5/301	74/18862	0.00657589	0.0500471	0.0386963	RAC2/KIT/HMOX1/PTGDS/SYK	5
	BP	GO:0061045	negative regulation of wound healing	5/301	74/18862	0.00657589	0.0500471	0.0386963	PLAUR/PLAU/TSPAN8/FGF2/FAP	5
	BP	GO:0048880	sensory system development	13/301	369/18862	0.0065914	0.0500471	0.0386963	GPM6A/MEIS2/COL5A2/THY1/ANGPTL7/COL4A1/COL5A1/KLF4/NDP/CHRDL1/CPAMD8/FGF2/SOX9	13
	BP	GO:0007632	visual behavior	4/301	47/18862	0.00661357	0.0500471	0.0386963	ATP1A2/MEIS2/KIT/PPP1R1B	4
	BP	GO:0030225	macrophage differentiation	4/301	47/18862	0.00661357	0.0500471	0.0386963	MMP9/HCLS1/ADIPOQ/TLR2	4
	BP	GO:0032147	activation of protein kinase activity	12/301	328/18862	0.00667411	0.0503939	0.0389645	CCL19/C5AR1/ADRA2A/CHI3L1/KIT/PRKAR2B/LPAR1/GREM1/CCL5/CXCR4/FGF2/SYK	12
	BP	GO:0060401	cytosolic calcium ion transport	8/301	173/18862	0.00671615	0.050599	0.0391231	ATP1A2/CCL19/THY1/CEMIP/CORO1A/FGF2/CCR5/LCK	8
	BP	GO:0002920	regulation of humoral immune response	7/301	138/18862	0.00674555	0.050599	0.0391231	C5AR1/IGLC1/C6/IGKC/IGLV1-44/CXCL13/C7	7
	BP	GO:0072006	nephron development	7/301	138/18862	0.00674555	0.050599	0.0391231	COL4A4/SULF1/GREM1/ADIPOQ/ENPEP/FGF2/SOX9	7
	BP	GO:0072001	renal system development	11/301	288/18862	0.0067762	0.050718	0.0392151	COL4A4/MMP9/COL4A1/SULF1/SDC1/CRLF1/GREM1/ADIPOQ/ENPEP/FGF2/SOX9	11
	BP	GO:0033209	tumor necrosis factor-mediated signaling pathway	8/301	174/18862	0.00694528	0.0518702	0.040106	LAPTM5/KRT18/PLVAP/TNFRSF11B/ADIPOQ/CD27/TNFRSF17/SYK	8
	BP	GO:0030336	negative regulation of cell migration	12/301	330/18862	0.00699065	0.0520955	0.0402802	CXCL12/SLAMF8/THY1/HMOX1/KLF4/SULF1/SFRP2/GREM1/CXCL13/ADIPOQ/STC1/FGF2	12
	BP	GO:0055076	transition metal ion homeostasis	7/301	139/18862	0.00700907	0.0521195	0.0402988	STEAP1/S100A9/SCARA5/S100A8/HMOX1/PRND/LCK	7
	BP	GO:0030195	negative regulation of blood coagulation	4/301	48/18862	0.00712594	0.0522648	0.0404111	PLAUR/PLAU/TSPAN8/FAP	4
	BP	GO:1990090	cellular response to nerve growth factor stimulus	4/301	48/18862	0.00712594	0.0522648	0.0404111	STMN2/ID1/CORO1A/TAC1	4
	BP	GO:0002092	positive regulation of receptor internalization	3/301	25/18862	0.00713534	0.0522648	0.0404111	APELA/GREM1/SYK	3
	BP	GO:0017145	stem cell division	3/301	25/18862	0.00713534	0.0522648	0.0404111	KIT/SFRP2/NAP1L2	3
	BP	GO:0042730	fibrinolysis	3/301	25/18862	0.00713534	0.0522648	0.0404111	PLAUR/PLAU/FAP	3
	BP	GO:0050927	positive regulation of positive chemotaxis	3/301	25/18862	0.00713534	0.0522648	0.0404111	SCG2/CXCL12/CXCL8	3
	BP	GO:0060740	prostate gland epithelium morphogenesis	3/301	25/18862	0.00713534	0.0522648	0.0404111	TNC/SULF1/SOX9	3
	BP	GO:0030178	negative regulation of Wnt signaling pathway	9/301	212/18862	0.00716566	0.052375	0.0404963	WIF1/CTHRC1/SFRP2/IGFBP4/GREM1/IGFBP2/SOX9/APCDD1/APCDD1L	9
	BP	GO:0030500	regulation of bone mineralization	5/301	76/18862	0.00735079	0.0536139	0.0414542	TMEM119/GREM1/CCR1/SOX9/COMP	5
	BP	GO:0032649	regulation of interferon-gamma production	6/301	107/18862	0.00739855	0.0538476	0.0416349	LAPTM5/CD2/TLR8/HLA-DPA1/RASGRP1/CD14	6
	BP	GO:0001961	positive regulation of cytokine-mediated signaling pathway	4/301	49/18862	0.00766384	0.0554569	0.0428792	MMP12/LAPTM5/TREM2/CXCR4	4
	BP	GO:0050982	detection of mechanical stimulus	4/301	49/18862	0.00766384	0.0554569	0.0428792	CXCL12/COL11A1/KIT/CXCR4	4
	BP	GO:0007565	female pregnancy	8/301	177/18862	0.00766819	0.0554569	0.0428792	SPP1/MMP9/VMP1/APELA/GJB2/STC1/IGFBP2/FOSB	8
	BP	GO:0032481	positive regulation of type I interferon production	5/301	77/18862	0.00776116	0.0558934	0.0432167	MMP12/TLR8/TLR2/CD14/SYK	5
	BP	GO:0048678	response to axon injury	5/301	77/18862	0.00776116	0.0558934	0.0432167	TNC/SPP1/KLF4/GAP43/TYROBP	5
	BP	GO:0040013	negative regulation of locomotion	13/301	377/18862	0.00782456	0.0562318	0.0434784	CXCL12/SLAMF8/THY1/HMOX1/KLF4/SULF1/SFRP2/GREM1/CXCL13/ADIPOQ/STC1/SPOCK3/FGF2	13
	BP	GO:0050926	regulation of positive chemotaxis	3/301	26/18862	0.00797209	0.0566978	0.0438386	SCG2/CXCL12/CXCL8	3
	BP	GO:0060351	cartilage development involved in endochondral bone morphogenesis	3/301	26/18862	0.00797209	0.0566978	0.0438386	STC1/SOX9/COMP	3
	BP	GO:0061082	myeloid leukocyte cytokine production	3/301	26/18862	0.00797209	0.0566978	0.0438386	LAPTM5/KIT/HMOX1	3
	BP	GO:0098868	bone growth	3/301	26/18862	0.00797209	0.0566978	0.0438386	STC1/SOX9/COMP	3
	BP	GO:1901623	regulation of lymphocyte chemotaxis	3/301	26/18862	0.00797209	0.0566978	0.0438386	CXCL13/CCL5/CCL4	3
	BP	GO:0051960	regulation of nervous system development	14/301	422/18862	0.00815607	0.0577967	0.0446884	FN1/CXCL12/SPP1/THY1/WASF3/KIT/RELN/CHODL/ID1/CCL11/CLSTN2/CXCR4/CTSC/TLR2	14
	BP	GO:0050886	endocrine process	5/301	78/18862	0.00818719	0.0577967	0.0446884	CTSG/CMA1/CPA3/ENPEP/TAC1	5
	BP	GO:0045104	intermediate filament cytoskeleton organization	4/301	50/18862	0.00822777	0.0577967	0.0446884	KRT18/PKP2/SYNM/KRT14	4
	BP	GO:0045744	negative regulation of G protein-coupled receptor signaling pathway	4/301	50/18862	0.00822777	0.0577967	0.0446884	GPRASP1/APELA/CXCL8/CCL5	4
	BP	GO:0048260	positive regulation of receptor-mediated endocytosis	4/301	50/18862	0.00822777	0.0577967	0.0446884	CCL19/APELA/GREM1/SYK	4
	BP	GO:1990089	response to nerve growth factor	4/301	50/18862	0.00822777	0.0577967	0.0446884	STMN2/ID1/CORO1A/TAC1	4
	BP	GO:0090288	negative regulation of cellular response to growth factor stimulus	6/301	110/18862	0.00843012	0.0590643	0.0456685	SULF1/SFRP2/CHRDL1/GREM1/CXCL13/FGF2	6
	BP	GO:0050806	positive regulation of synaptic transmission	7/301	144/18862	0.00844268	0.0590643	0.0456685	RELN/IGSF11/CLSTN2/TYROBP/LILRB2/TAC1/NSG1	7
	BP	GO:0042445	hormone metabolic process	9/301	218/18862	0.00852852	0.0595433	0.0460388	SPP1/CTSG/CHST9/CMA1/CPA3/ADH1B/ENPEP/SLC16A10/ALDH1A1	9
	BP	GO:1903169	regulation of calcium ion transmembrane transport	7/301	145/18862	0.00875349	0.0608769	0.04707	ATP1A2/THY1/ATP1B1/ADRA2A/CEMIP/CORO1A/PLP1	7
	BP	GO:1904062	regulation of cation transmembrane transport	12/301	340/18862	0.00875506	0.0608769	0.04707	ATP1A2/MMP9/THY1/WNK3/ATP1B1/ADRA2A/RELN/CEMIP/TREM2/CORO1A/PLP1/CTSS	12
	BP	GO:0045103	intermediate filament-based process	4/301	51/18862	0.00881823	0.0608949	0.0470839	KRT18/PKP2/SYNM/KRT14	4
	BP	GO:0003401	axis elongation	3/301	27/18862	0.00886422	0.0608949	0.0470839	TNC/SFRP2/SOX9	3
	BP	GO:0010758	regulation of macrophage chemotaxis	3/301	27/18862	0.00886422	0.0608949	0.0470839	SLAMF8/C5AR1/CCL5	3
	BP	GO:0034110	regulation of homotypic cell-cell adhesion	3/301	27/18862	0.00886422	0.0608949	0.0470839	PLAUR/CCL5/SYK	3
	BP	GO:0045672	positive regulation of osteoclast differentiation	3/301	27/18862	0.00886422	0.0608949	0.0470839	TREM2/TYROBP/CCR1	3
	BP	GO:0060512	prostate gland morphogenesis	3/301	27/18862	0.00886422	0.0608949	0.0470839	TNC/SULF1/SOX9	3
	BP	GO:0002695	negative regulation of leukocyte activation	8/301	182/18862	0.00899702	0.0616836	0.0476937	LAPTM5/HMOX1/CLEC4G/NRARP/LRFN5/MNDA/TYROBP/LILRB2	8
	BP	GO:0030278	regulation of ossification	6/301	112/18862	0.00917275	0.0625133	0.0483352	TMEM119/GREM1/CCR1/TAC1/SOX9/COMP	6
	BP	GO:0032411	positive regulation of transporter activity	6/301	112/18862	0.00917275	0.0625133	0.0483352	WNK3/ATP1B1/RELN/TREM2/ADIPOQ/CTSS	6
	BP	GO:0032609	interferon-gamma production	6/301	112/18862	0.00917275	0.0625133	0.0483352	LAPTM5/CD2/TLR8/HLA-DPA1/RASGRP1/CD14	6
	BP	GO:0002886	regulation of myeloid leukocyte mediated immunity	4/301	52/18862	0.00943569	0.0637979	0.0493285	RAC2/HMOX1/TYROBP/SYK	4
	BP	GO:0031103	axon regeneration	4/301	52/18862	0.00943569	0.0637979	0.0493285	TNC/SPP1/KLF4/GAP43	4
	BP	GO:0050819	negative regulation of coagulation	4/301	52/18862	0.00943569	0.0637979	0.0493285	PLAUR/PLAU/TSPAN8/FAP	4
	BP	GO:0060350	endochondral bone morphogenesis	4/301	52/18862	0.00943569	0.0637979	0.0493285	TMEM119/STC1/SOX9/COMP	4
	BP	GO:0030282	bone mineralization	6/301	113/18862	0.00956108	0.0645185	0.0498856	IBSP/TMEM119/GREM1/CCR1/SOX9/COMP	6
	CC	GO:0062023	collagen-containing extracellular matrix	45/312	423/19520	3.60694e-24	1.0388e-21	7.97323e-22	FN1/LUM/CXCL12/S100A9/COL4A4/TNC/CTSB/VWF/MMP9/S100A8/THBS2/COL5A2/CTSG/CTHRC1/ANGPTL7/COL11A1/COCH/COL6A6/COL4A1/SLPI/LRRC15/COL5A1/NDP/CMA1/MYOC/COL4A2/SULF1/SERPINA1/PRG4/TGFBI/SFRP2/CPA3/COL10A1/TPSB2/ADAMDEC1/GREM1/FCN1/ADIPOQ/VIT/ADAMTS5/TPSAB1/ANGPTL1/CTSC/COMP/CTSS	45
	CC	GO:0009897	external side of plasma membrane	29/312	402/19520	1.43112e-11	2.06082e-09	1.58177e-09	CXCL12/SCARA5/F10/FCER1G/THY1/VCAM1/IGLC1/KIT/IGKC/KRT18/IGHM/SDC1/CRLF1/TRBC1/PRND/CD2/TLR8/IGHD/FCN1/ENPEP/IL7R/IGSF21/CD27/CD3D/CXCR4/CCR1/CCR5/CD14/IGLL5	29
	CC	GO:0005581	collagen trimer	12/312	87/19520	1.36921e-08	1.31444e-06	1.00889e-06	LUM/COL4A4/COL5A2/CTHRC1/COL11A1/COL6A6/COL4A1/COL5A1/COL4A2/COL10A1/FCN1/ADIPOQ	12
	CC	GO:0098644	complex of collagen trimers	7/312	21/19520	2.39125e-08	1.7217e-06	1.32148e-06	LUM/COL4A4/COL5A2/COL11A1/COL4A1/COL5A1/COL4A2	7
	CC	GO:0034774	secretory granule lumen	21/312	322/19520	5.89294e-08	3.3181e-06	2.54678e-06	FN1/PPBP/S100A9/VWF/S100A8/CTSG/GMFG/CHI3L1/SLPI/SERPINA1/RNASE2/PLAC8/F5/FCN1/AMPD3/LYZ/MNDA/CXCL1/CTSC/HPSE/BIN2	21
	CC	GO:0060205	cytoplasmic vesicle lumen	21/312	326/19520	7.27011e-08	3.3181e-06	2.54678e-06	FN1/PPBP/S100A9/VWF/S100A8/CTSG/GMFG/CHI3L1/SLPI/SERPINA1/RNASE2/PLAC8/F5/FCN1/AMPD3/LYZ/MNDA/CXCL1/CTSC/HPSE/BIN2	21
	CC	GO:0031983	vesicle lumen	21/312	328/19520	8.06482e-08	3.3181e-06	2.54678e-06	FN1/PPBP/S100A9/VWF/S100A8/CTSG/GMFG/CHI3L1/SLPI/SERPINA1/RNASE2/PLAC8/F5/FCN1/AMPD3/LYZ/MNDA/CXCL1/CTSC/HPSE/BIN2	21
	CC	GO:0005788	endoplasmic reticulum lumen	20/312	306/19520	1.18383e-07	4.26179e-06	3.27111e-06	SCG2/FN1/PLAUR/COL4A4/TNC/SPP1/F10/COL5A2/COL11A1/COL4A1/COL5A1/COL4A2/SERPINA1/CHRDL1/COL10A1/IGFBP4/F5/ADAMTS5/MZB1/CTSC	20
	CC	GO:0070820	tertiary granule	13/312	164/19520	2.44596e-06	7.82706e-05	6.00761e-05	PPBP/CD93/MMP9/FCER1G/PLAU/GPR84/TNFAIP6/CLEC5A/LYZ/CXCL1/LILRB2/PTPRB/CTSS	13
	CC	GO:0101002	ficolin-1-rich granule	13/312	185/19520	9.19243e-06	0.000264742	0.000203201	CD93/CTSB/MMP9/FCER1G/GMFG/SERPINA1/TNFAIP6/FCN1/AMPD3/MNDA/LILRB2/CTSS/BIN2	13
	CC	GO:0042581	specific granule	12/312	160/19520	1.0527e-05	0.000275617	0.000211548	PLAUR/CD93/PLAU/CHI3L1/SLPI/GPR84/ANXA3/CLEC5A/LYZ/CXCL1/PTPRB/HPSE	12
	CC	GO:0005775	vacuolar lumen	12/312	173/19520	2.3093e-05	0.000549905	0.000422076	LUM/CTSB/CTSG/SDC1/RNASE2/PLAC8/LYZ/MNDA/CTSC/NSG1/HPSE/CTSS	12
	CC	GO:0031233	intrinsic component of external side of plasma membrane	5/312	23/19520	2.68364e-05	0.000549905	0.000422076	F10/THY1/PRND/IGSF21/CD14	5
	CC	GO:0005583	fibrillar collagen trimer	4/312	12/19520	2.86409e-05	0.000549905	0.000422076	LUM/COL5A2/COL11A1/COL5A1	4
	CC	GO:0098643	banded collagen fibril	4/312	12/19520	2.86409e-05	0.000549905	0.000422076	LUM/COL5A2/COL11A1/COL5A1	4
	CC	GO:1904813	ficolin-1-rich granule lumen	10/312	124/19520	3.08157e-05	0.000554682	0.000425743	CTSB/MMP9/GMFG/SERPINA1/TNFAIP6/FCN1/AMPD3/MNDA/CTSS/BIN2	10
	CC	GO:0045121	membrane raft	16/312	323/19520	6.91119e-05	0.00110579	0.000848742	ATP1A2/HCK/THY1/ATP1B1/PRKAR2B/HMOX1/SULF1/ITLN1/TREM2/CD2/PLVAP/PLLP/TLR2/CD14/HPSE/LCK	16
	CC	GO:0098857	membrane microdomain	16/312	323/19520	6.91119e-05	0.00110579	0.000848742	ATP1A2/HCK/THY1/ATP1B1/PRKAR2B/HMOX1/SULF1/ITLN1/TREM2/CD2/PLVAP/PLLP/TLR2/CD14/HPSE/LCK	16
	CC	GO:0042613	MHC class II protein complex	4/312	16/19520	0.000100112	0.00151748	0.00116474	HLA-DMA/HLA-DPA1/HLA-DRA/HLA-DMB	4
	CC	GO:0030667	secretory granule membrane	15/312	305/19520	0.000125701	0.0018101	0.00138933	PLAUR/CD93/C5AR1/FCER1G/PLAU/FCGR3B/GPR84/CLEC5A/LAMP3/TYROBP/LILRB2/PTPRB/TLR2/CD14/PLA1A	15
	CC	GO:0070821	tertiary granule membrane	7/312	73/19520	0.000164611	0.00225753	0.00173275	CD93/FCER1G/PLAU/GPR84/CLEC5A/LILRB2/PTPRB	7
	CC	GO:0031362	anchored component of external side of plasma membrane	4/312	19/19520	0.000205282	0.00268733	0.00206264	THY1/PRND/IGSF21/CD14	4
	CC	GO:1904724	tertiary granule lumen	6/312	55/19520	0.000238455	0.00298587	0.00229178	PPBP/MMP9/TNFAIP6/LYZ/CXCL1/CTSS	6
	CC	GO:0031225	anchored component of membrane	10/312	170/19520	0.000420863	0.00505035	0.00387637	PLAUR/CD52/THY1/FCGR3B/PRND/ITLN1/CD2/IGSF21/CD14/VNN2	10
	CC	GO:0001772	immunological synapse	5/312	41/19520	0.000472356	0.00544154	0.00417662	GZMB/CORO1A/HLA-DRA/GZMA/LCK	5
	CC	GO:0042611	MHC protein complex	4/312	25/19520	0.000621216	0.00688117	0.0052816	HLA-DMA/HLA-DPA1/HLA-DRA/HLA-DMB	4
	CC	GO:0005604	basement membrane	7/312	94/19520	0.000777813	0.00829667	0.00636806	FN1/COL4A4/TNC/COL4A1/COL5A1/COL4A2/TGFBI	7
	CC	GO:0042571	immunoglobulin complex, circulating	6/312	77/19520	0.00145489	0.0149646	0.011486	IGLC1/IGKC/IGHM/TRBC1/IGHD/IGLL5	6
	CC	GO:0034358	plasma lipoprotein particle	4/312	36/19520	0.00252009	0.0241929	0.0185691	PLTP/HPR/PLA2G7/VLDLR	4
	CC	GO:1990777	lipoprotein particle	4/312	36/19520	0.00252009	0.0241929	0.0185691	PLTP/HPR/PLA2G7/VLDLR	4
	CC	GO:0046658	anchored component of plasma membrane	5/312	60/19520	0.00269005	0.0248688	0.0190879	THY1/PRND/CD2/IGSF21/CD14	5
	CC	GO:0030665	clathrin-coated vesicle membrane	7/312	117/19520	0.0027632	0.0248688	0.0190879	CEMIP/FCGR1B/HLA-DPA1/IL7R/BTC/HLA-DRA/CD3D	7
	CC	GO:0035580	specific granule lumen	5/312	62/19520	0.00310592	0.0264488	0.0203006	CHI3L1/SLPI/LYZ/CXCL1/HPSE	5
	CC	GO:0032994	protein-lipid complex	4/312	39/19520	0.00338949	0.0264488	0.0203006	PLTP/HPR/PLA2G7/VLDLR	4
	CC	GO:0031091	platelet alpha granule	6/312	91/19520	0.00339793	0.0264488	0.0203006	FN1/PPBP/VWF/THBS2/SERPINA1/F5	6
	CC	GO:0035578	azurophil granule lumen	6/312	91/19520	0.00339793	0.0264488	0.0203006	CTSG/RNASE2/PLAC8/LYZ/MNDA/CTSC	6
	CC	GO:0035579	specific granule membrane	6/312	91/19520	0.00339793	0.0264488	0.0203006	PLAUR/CD93/PLAU/GPR84/CLEC5A/PTPRB	6
	CC	GO:0031093	platelet alpha granule lumen	5/312	67/19520	0.00434573	0.0326683	0.0250744	FN1/PPBP/VWF/SERPINA1/F5	5
	CC	GO:0043202	lysosomal lumen	6/312	96/19520	0.00442384	0.0326683	0.0250744	LUM/CTSB/SDC1/NSG1/HPSE/CTSS	6
	CC	GO:0019814	immunoglobulin complex	8/312	167/19520	0.00551896	0.0397365	0.0304995	IGLC1/IGKC/IGHM/IGLV1-44/TRBC1/IGHD/SYK/IGLL5	8
	CC	GO:0036019	endolysosome	3/312	24/19520	0.00638293	0.0448362	0.0344137	CTSB/TLR8/CTSS	3
	CC	GO:0030135	coated vesicle	11/312	295/19520	0.00815648	0.0559301	0.0429288	VWF/SERPINA1/CEMIP/F5/FCGR1B/HLA-DPA1/IL7R/BTC/HLA-DRA/CD3D/CTSC	11
	CC	GO:0044853	plasma membrane raft	6/312	111/19520	0.00886899	0.0582884	0.0447389	ATP1A2/HCK/ATP1B1/HMOX1/TREM2/PLVAP	6
	CC	GO:0034364	high-density lipoprotein particle	3/312	27/19520	0.00890517	0.0582884	0.0447389	PLTP/HPR/PLA2G7	3
	CC	GO:0005901	caveola	5/312	80/19520	0.00915231	0.0585748	0.0449587	ATP1A2/HCK/ATP1B1/HMOX1/PLVAP	5
	CC	GO:0005884	actin filament	6/312	113/19520	0.00964009	0.0603554	0.0463254	RAC2/HCK/SMTNL2/HCLS1/CORO1A/EHBP1	6
	CC	GO:0002102	podosome	3/312	28/19520	0.00985759	0.060404	0.0463627	VCAM1/RHOU/BIN2	3
	CC	GO:0030139	endocytic vesicle	11/312	307/19520	0.0107889	0.0647337	0.0496859	RAC2/LPAR1/CEMIP/CORO1A/ANXA3/FCGR1B/HLA-DPA1/HLA-DRA/TLR2/CTSS/SYK	11
	MF	GO:0008009	chemokine activity	13/301	49/18337	7.50499e-13	3.68495e-10	2.923e-10	CXCL16/CXCL12/PPBP/CCL19/CXCL5/CCL18/CCL8/CCL11/CXCL8/CXCL13/CCL5/CXCL1/CCL4	13
	MF	GO:0005201	extracellular matrix structural constituent	20/301	170/18337	6.12096e-12	1.5027e-09	1.19198e-09	FN1/LUM/COL4A4/TNC/VWF/THBS2/COL5A2/CTHRC1/COL11A1/COL6A6/COL4A1/CHI3L1/COL5A1/COL4A2/PRG4/TGFBI/COL10A1/ADIPOQ/TFPI2/COMP	20
	MF	GO:0005125	cytokine activity	22/301	235/18337	5.1336e-11	8.40199e-09	6.66468e-09	CXCL16/SCG2/CXCL12/PPBP/SPP1/CCL19/CXCL5/NDP/CCL18/CCL8/CCL11/CRLF1/CXCL8/GREM1/TNFRSF11B/CXCL13/CCL5/ADIPOQ/CXCL1/CCL4/FGF2/IL17D	22
	MF	GO:0042379	chemokine receptor binding	13/301	69/18337	8.23542e-11	1.0109e-08	8.0187e-09	CXCL16/CXCL12/PPBP/CCL19/CXCL5/CCL18/CCL8/CCL11/CXCL8/CXCL13/CCL5/CXCL1/CCL4	13
	MF	GO:0005178	integrin binding	17/301	142/18337	1.84638e-10	1.81315e-08	1.43823e-08	FN1/CXCL12/SPP1/VWF/IBSP/THY1/VCAM1/COL5A1/TSPAN8/TGFBI/SFRP2/ITGA4/ADAMTS5/FGF2/COMP/SYK/FAP	17
	MF	GO:0001664	G protein-coupled receptor binding	23/301	289/18337	4.80243e-10	3.92999e-08	3.11736e-08	CXCL16/CXCL12/PPBP/CCL19/CXCL5/CTHRC1/ADRA2A/NDP/MYOC/CCL18/ADRB1/APELA/CCL8/CCL11/CXCL8/CXCL13/FCN1/CCL5/CXCL1/PPP1R1B/CCL4/TAC1/GNA15	23
	MF	GO:0005518	collagen binding	12/301	68/18337	9.86189e-10	6.91741e-08	5.48707e-08	FN1/LUM/MMP12/CTSB/VWF/MMP9/COCH/LRRC15/TGFBI/MMP13/COMP/CTSS	12
	MF	GO:0005539	glycosaminoglycan binding	19/301	228/18337	7.64948e-09	4.69487e-07	3.72409e-07	FN1/THBS2/CTSG/COL11A1/COL5A1/NDNF/IGHM/SULF1/CCL8/CEMIP/TREM2/TNFAIP6/CXCL13/VIT/ADAMTS5/SPOCK3/FGF2/TLR2/COMP	19
	MF	GO:0048018	receptor ligand activity	27/301	486/18337	3.65205e-08	1.9924e-06	1.58042e-06	CXCL16/SCG2/CXCL12/PPBP/SPP1/CCL19/CXCL5/GMFG/NDP/CCL18/APELA/CCL8/CCL11/SFRP2/CRLF1/CXCL8/GREM1/TNFRSF11B/CXCL13/CCL5/ADIPOQ/STC1/CXCL1/BTC/CCL4/FGF2/IL17D	27
	MF	GO:0030546	signaling receptor activator activity	27/301	492/18337	4.69904e-08	2.30723e-06	1.83015e-06	CXCL16/SCG2/CXCL12/PPBP/SPP1/CCL19/CXCL5/GMFG/NDP/CCL18/APELA/CCL8/CCL11/SFRP2/CRLF1/CXCL8/GREM1/TNFRSF11B/CXCL13/CCL5/ADIPOQ/STC1/CXCL1/BTC/CCL4/FGF2/IL17D	27
	MF	GO:0008236	serine-type peptidase activity	16/301	186/18337	7.67903e-08	3.42764e-06	2.71889e-06	MMP9/F10/PLAU/CTSG/HPR/GZMB/RELN/CMA1/MMP1/CPVL/TPSB2/GZMA/TPSAB1/CTSC/GZMK/FAP	16
	MF	GO:0017171	serine hydrolase activity	16/301	188/18337	8.91228e-08	3.64661e-06	2.89258e-06	MMP9/F10/PLAU/CTSG/HPR/GZMB/RELN/CMA1/MMP1/CPVL/TPSB2/GZMA/TPSAB1/CTSC/GZMK/FAP	16
	MF	GO:0030020	extracellular matrix structural constituent conferring tensile strength	8/301	41/18337	2.86679e-07	1.02647e-05	8.14219e-06	COL4A4/COL5A2/COL11A1/COL6A6/COL4A1/COL5A1/COL4A2/COL10A1	8
	MF	GO:0045236	CXCR chemokine receptor binding	6/301	18/18337	2.92679e-07	1.02647e-05	8.14219e-06	CXCL12/PPBP/CXCL5/CXCL8/CXCL13/CXCL1	6
	MF	GO:0004252	serine-type endopeptidase activity	14/301	168/18337	7.43001e-07	2.43209e-05	1.9292e-05	MMP9/F10/PLAU/CTSG/HPR/GZMB/CMA1/MMP1/TPSB2/GZMA/TPSAB1/CTSC/GZMK/FAP	14
	MF	GO:0035325	Toll-like receptor binding	5/301	12/18337	8.30829e-07	2.54961e-05	2.02241e-05	S100A9/S100A8/TLR2/SYK/LY96	5
	MF	GO:0043394	proteoglycan binding	7/301	36/18337	1.66212e-06	4.80059e-05	3.80795e-05	FN1/TNC/CTSB/COL5A1/COMP/HPSE/CTSS	7
	MF	GO:0048020	CCR chemokine receptor binding	7/301	46/18337	9.26097e-06	0.000252619	0.000200384	CCL19/CCL18/CCL8/CCL11/CXCL13/CCL5/CCL4	7
	MF	GO:0005126	cytokine receptor binding	16/301	270/18337	1.07053e-05	0.000276649	0.000219445	CXCL16/CXCL12/PPBP/CCL19/CXCL5/CCL18/CCL8/CCL11/CRLF1/CXCL8/GREM1/CXCL13/CCL5/CXCL1/CCL4/SYK	16
	MF	GO:0140375	immune receptor activity	11/301	136/18337	1.53432e-05	0.000376675	0.000298788	C5AR1/FCER1G/CRLF1/FCGR1B/HLA-DPA1/IL7R/HLA-DRA/CXCR4/LILRB2/CCR1/CCR5	11
	MF	GO:0003823	antigen binding	12/301	165/18337	1.85621e-05	0.000434	0.00034426	IGLC1/IGKC/IGHM/IGLV1-44/TRBC1/IGHD/ITGA4/HLA-DPA1/FCN1/IL7R/HLA-DRA/IGLL5	12
	MF	GO:0061134	peptidase regulator activity	14/301	230/18337	2.83727e-05	0.000633227	0.000502292	FN1/SLPI/SERPINA1/SFRP2/TIMP4/CPAMD8/TFPI2/CD27/SPOCK3/PI15/CTSC/SPOCK1/RPS6KA1/CSTA	14
	MF	GO:0038187	pattern recognition receptor activity	5/301	23/18337	3.0431e-05	0.000649635	0.000515307	TLR8/FCN1/TLR2/CD14/LY96	5
	MF	GO:0004175	endopeptidase activity	20/301	438/18337	4.01267e-05	0.000820926	0.00065118	MMP12/CTSB/MMP9/F10/PLAU/CTSG/HPR/GZMB/CMA1/MMP1/TPSB2/ADAMDEC1/MMP13/ADAMTS5/GZMA/TPSAB1/CTSC/CTSS/GZMK/FAP	20
	MF	GO:0023023	MHC protein complex binding	5/301	26/18337	5.71356e-05	0.00112214	0.000890113	ATP1B1/HLA-DMA/HLA-DRA/LILRB2/HLA-DMB	5
	MF	GO:0001968	fibronectin binding	5/301	28/18337	8.31002e-05	0.00156859	0.00124425	LRRC15/MYOC/SFRP2/ITGA4/CTSS	5
	MF	GO:0008201	heparin binding	11/301	164/18337	8.62565e-05	0.00156859	0.00124425	FN1/THBS2/CTSG/COL11A1/COL5A1/NDNF/CCL8/CXCL13/ADAMTS5/FGF2/COMP	11
	MF	GO:0017147	Wnt-protein binding	5/301	30/18337	0.000117301	0.00205696	0.00163163	WIF1/CTHRC1/SFRP2/APCDD1/APCDD1L	5
	MF	GO:0023026	MHC class II protein complex binding	4/301	17/18337	0.000143073	0.00242237	0.00192149	ATP1B1/HLA-DMA/HLA-DRA/HLA-DMB	4
	MF	GO:0019956	chemokine binding	5/301	33/18337	0.00018765	0.0030712	0.00243616	ITGA4/CXCR4/FGF2/CCR1/CCR5	5
	MF	GO:0030414	peptidase inhibitor activity	11/301	187/18337	0.000273683	0.00421148	0.00334066	SLPI/SERPINA1/TIMP4/CPAMD8/TFPI2/CD27/SPOCK3/PI15/SPOCK1/RPS6KA1/CSTA	11
	MF	GO:0050840	extracellular matrix binding	6/301	55/18337	0.000274476	0.00421148	0.00334066	SPP1/COL11A1/LRRC15/TGFBI/ADAMTS5/CTSS	6
	MF	GO:0061135	endopeptidase regulator activity	11/301	192/18337	0.000343129	0.00510534	0.00404969	SLPI/SERPINA1/SFRP2/TIMP4/CPAMD8/TFPI2/CD27/SPOCK3/SPOCK1/RPS6KA1/CSTA	11
	MF	GO:0019955	cytokine binding	9/301	136/18337	0.000416257	0.00601124	0.00476827	KIT/CRLF1/GREM1/ITGA4/CXCR4/FGF2/CCR1/CCR5/COMP	9
	MF	GO:0019865	immunoglobulin binding	4/301	24/18337	0.000583474	0.00818531	0.00649279	VWF/FCER1G/FCGR3B/FCGR1B	4
	MF	GO:0019864	IgG binding	3/301	11/18337	0.000655288	0.00893741	0.00708938	FCER1G/FCGR3B/FCGR1B	3
	MF	GO:0030247	polysaccharide binding	4/301	25/18337	0.000685703	0.00909946	0.00721792	PRG4/CLEC4G/HLA-DRA/ENPP2	4
	MF	GO:0004866	endopeptidase inhibitor activity	10/301	180/18337	0.000803417	0.010381	0.00823447	SLPI/SERPINA1/TIMP4/CPAMD8/TFPI2/CD27/SPOCK3/SPOCK1/RPS6KA1/CSTA	10
	MF	GO:0004715	non-membrane spanning protein tyrosine kinase activity	5/301	46/18337	0.000910774	0.0114664	0.00909545	HCK/SLA/ITK/LCK/SYK	5
	MF	GO:1901681	sulfur compound binding	12/301	260/18337	0.00127836	0.0156918	0.0124472	FN1/THBS2/CTSG/COL11A1/COL5A1/NDNF/CCL8/ACADL/CXCL13/ADAMTS5/FGF2/COMP	12
	MF	GO:0005041	low-density lipoprotein particle receptor activity	3/301	14/18337	0.00139375	0.016598	0.013166	CXCL16/LRP1B/VLDLR	3
	MF	GO:0038024	cargo receptor activity	6/301	75/18337	0.00145043	0.016598	0.013166	CXCL16/SCARA5/PRG4/LRP1B/ENPP2/VLDLR	6
	MF	GO:0002020	protease binding	8/301	131/18337	0.00145359	0.016598	0.013166	FN1/VWF/KIT/SERPINA1/TIMP4/COMP/CSTA/FAP	8
	MF	GO:0030246	carbohydrate binding	12/301	267/18337	0.00160043	0.0178594	0.0141665	CD93/FBP1/CHI3L1/CHODL/PRG4/CLEC4G/ITLN1/CLEC5A/FCN1/HLA-DRA/KLRB1/ENPP2	12
	MF	GO:0019215	intermediate filament binding	3/301	15/18337	0.00172113	0.0184685	0.0146497	PKP2/SYNM/KRT14	3
	MF	GO:0004620	phospholipase activity	7/301	105/18337	0.00173025	0.0184685	0.0146497	HMOX1/CCL5/PLA2G7/ENPP2/CCR1/CCR5/PLA1A	7
	MF	GO:0001530	lipopolysaccharide binding	4/301	32/18337	0.00178118	0.0186076	0.01476	TREM2/TLR2/CD14/LY96	4
	MF	GO:0004857	enzyme inhibitor activity	15/301	385/18337	0.00183461	0.0187665	0.0148861	GMFG/SLPI/PRKAR2B/SERPINA1/TIMP4/ANXA3/CPAMD8/TFPI2/CD27/PPP1R1B/SPOCK3/PI15/SPOCK1/RPS6KA1/CSTA	15
	MF	GO:0034987	immunoglobulin receptor binding	6/301	79/18337	0.00189606	0.0189993	0.0150707	IGLC1/IGKC/IGHM/TRBC1/IGHD/IGLL5	6
	MF	GO:0008191	metalloendopeptidase inhibitor activity	3/301	16/18337	0.00209274	0.0205507	0.0163013	TIMP4/SPOCK3/SPOCK1	3
	MF	GO:0030228	lipoprotein particle receptor activity	3/301	17/18337	0.00251052	0.0241699	0.0191722	CXCL16/LRP1B/VLDLR	3
	MF	GO:0042834	peptidoglycan binding	3/301	18/18337	0.00297631	0.0281032	0.0222922	IGHM/TREM2/TLR2	3
	MF	GO:0008237	metallopeptidase activity	9/301	184/18337	0.00344161	0.0318836	0.0252909	MMP12/MMP9/MMP1/CPA3/ADAMDEC1/ENPEP/TRHDE/MMP13/ADAMTS5	9
	MF	GO:0008238	exopeptidase activity	6/301	95/18337	0.00477093	0.0433801	0.0344102	CPA3/CPVL/ENPEP/TRHDE/CTSC/FAP	6
	MF	GO:0033218	amide binding	14/301	391/18337	0.00542552	0.0484351	0.03842	PLTP/ITM2A/TMEM158/CMA1/CEMIP/TREM2/ACADL/HLA-DPA1/ENPEP/TRHDE/HLA-DRA/LILRB2/TLR2/CD14	14
	MF	GO:0016298	lipase activity	7/301	130/18337	0.00568756	0.0498677	0.0395563	HMOX1/CCL5/PLA2G7/ENPP2/CCR1/CCR5/PLA1A	7
	MF	GO:0042277	peptide binding	12/301	315/18337	0.00606541	0.0514742	0.0408307	ITM2A/TMEM158/CMA1/CEMIP/TREM2/HLA-DPA1/ENPEP/TRHDE/HLA-DRA/LILRB2/TLR2/CD14	12
	MF	GO:0016493	C-C chemokine receptor activity	3/301	23/18337	0.00608046	0.0514742	0.0408307	CXCR4/CCR1/CCR5	3
	MF	GO:0019957	C-C chemokine binding	3/301	24/18337	0.00686574	0.0571369	0.0453225	CXCR4/CCR1/CCR5	3
	MF	GO:0005044	scavenger receptor activity	4/301	47/18337	0.00729132	0.0596673	0.0473296	CXCL16/SCARA5/PRG4/ENPP2	4
KEGG		hsa04061	Viral protein interaction with cytokine and cytokine receptor	15/166	100/8109	1.38312e-09	1.67781e-07	1.35243e-07	CXCL12/PPBP/CCL19/CXCL5/CCL18/CCL8/CCL11/CXCL8/CXCL13/CCL5/CXCL1/CCL4/CXCR4/CCR1/CCR5	15
		hsa04062	Chemokine signaling pathway	20/166	192/8109	1.76395e-09	1.67781e-07	1.35243e-07	CXCL16/CXCL12/PPBP/CCL19/RAC2/HCK/CXCL5/CCL18/CCL8/CCL11/SHC4/CXCL8/CXCL13/CCL5/CXCL1/CCL4/CXCR4/CCR1/CCR5/ITK	20
		hsa04512	ECM-receptor interaction	14/166	88/8109	2.26732e-09	1.67781e-07	1.35243e-07	FN1/COL4A4/TNC/SPP1/VWF/IBSP/THBS2/COL6A6/COL4A1/RELN/COL4A2/SDC1/ITGA4/COMP	14
		hsa05323	Rheumatoid arthritis	12/166	93/8109	3.60604e-07	2.00135e-05	1.61323e-05	CXCL12/CXCL5/MMP1/CXCL8/ACP5/HLA-DMA/HLA-DPA1/CCL5/CXCL1/HLA-DRA/HLA-DMB/TLR2	12
		hsa04060	Cytokine-cytokine receptor interaction	21/166	295/8109	5.46162e-07	2.42496e-05	1.95468e-05	CXCL16/CXCL12/PPBP/CCL19/CXCL5/CCL18/CCL8/CCL11/CXCL8/TNFRSF11B/CXCL13/CCL5/IL7R/CXCL1/CD27/CCL4/CXCR4/CCR1/TNFRSF17/CCR5/IL17D	21
		hsa04974	Protein digestion and absorption	12/166	103/8109	1.10889e-06	3.90571e-05	3.14827e-05	COL4A4/ATP1A2/COL5A2/COL11A1/ATP1B1/COL6A6/COL4A1/COL5A1/COL4A2/CPA3/COL10A1/SLC16A10	12
		hsa04064	NF-kappa B signaling pathway	12/166	104/8109	1.23153e-06	3.90571e-05	3.14827e-05	CXCL12/CCL19/PLAU/VCAM1/CXCL8/CXCL1/CCL4/CD14/LCK/BCL2A1/SYK/LY96	12
		hsa04657	IL-17 signaling pathway	11/166	94/8109	3.02046e-06	8.38178e-05	6.7563e-05	S100A9/MMP9/S100A8/CXCL5/MMP1/CCL11/CXCL8/MMP13/CXCL1/IL17D/FOSB	11
		hsa04672	Intestinal immune network for IgA production	8/166	49/8109	5.751e-06	0.000141858	0.000114347	CXCL12/HLA-DMA/ITGA4/HLA-DPA1/HLA-DRA/CXCR4/TNFRSF17/HLA-DMB	8
		hsa04145	Phagosome	13/166	152/8109	1.28951e-05	0.000286272	0.000230755	THBS2/FCGR3B/CORO1A/HLA-DMA/HLA-DPA1/HLA-DRA/HLA-DMB/TUBAL3/TUBB2B/TLR2/CD14/COMP/CTSS	13
		hsa04510	Focal adhesion	15/166	201/8109	1.44054e-05	0.000290726	0.000234345	FN1/COL4A4/TNC/SPP1/VWF/RAC2/IBSP/THBS2/COL6A6/COL4A1/RELN/COL4A2/SHC4/ITGA4/COMP	15
		hsa04640	Hematopoietic cell lineage	10/166	99/8109	3.19886e-05	0.00055293	0.0004457	KIT/CD2/HLA-DMA/ITGA4/HLA-DPA1/IL7R/HLA-DRA/CD3D/HLA-DMB/CD14	10
		hsa05310	Asthma	6/166	31/8109	3.23788e-05	0.00055293	0.0004457	FCER1G/CCL11/HLA-DMA/HLA-DPA1/HLA-DRA/HLA-DMB	6
		hsa05146	Amoebiasis	10/166	102/8109	4.14904e-05	0.000657919	0.000530328	FN1/COL4A4/CTSG/COL4A1/COL4A2/CXCL8/CXCL1/TLR2/CD14/GNA15	10
		hsa04610	Complement and coagulation cascades	9/166	85/8109	5.51975e-05	0.000816923	0.000658496	PLAUR/VWF/F10/C5AR1/PLAU/C6/SERPINA1/F5/C7	9
		hsa05144	Malaria	7/166	50/8109	6.32004e-05	0.000876905	0.000706846	THBS2/VCAM1/SDC1/CXCL8/KLRB1/TLR2/COMP	7
		hsa04151	PI3K-Akt signaling pathway	19/166	354/8109	0.000106635	0.00139253	0.00112248	FN1/COL4A4/TNC/SPP1/VWF/IBSP/THBS2/COL6A6/COL4A1/KIT/RELN/COL4A2/LPAR1/ITGA4/IL7R/FGF2/TLR2/COMP/SYK	19
		hsa04380	Osteoclast differentiation	10/166	128/8109	0.000279958	0.00345282	0.00278321	FHL2/FCGR3B/TREM2/ACP5/TNFRSF11B/TYROBP/LILRB2/LCK/SYK/FOSB	10
		hsa05150	Staphylococcus aureus infection	8/166	96/8109	0.000748663	0.00874753	0.00705112	C5AR1/FCGR3B/KRT18/HLA-DMA/HLA-DPA1/HLA-DRA/KRT14/HLA-DMB	8
		hsa05140	Leishmaniasis	7/166	77/8109	0.000958208	0.0103967	0.00838043	FCGR3B/HLA-DMA/ITGA4/HLA-DPA1/HLA-DRA/HLA-DMB/TLR2	7
		hsa05330	Allograft rejection	5/166	38/8109	0.000983469	0.0103967	0.00838043	GZMB/HLA-DMA/HLA-DPA1/HLA-DRA/HLA-DMB	5
		hsa04614	Renin-angiotensin system	4/166	23/8109	0.00110654	0.0109408	0.00881907	CTSG/CMA1/CPA3/ENPEP	4
		hsa05152	Tuberculosis	11/166	180/8109	0.00113351	0.0109408	0.00881907	FCER1G/FCGR3B/CORO1A/HLA-DMA/HLA-DPA1/HLA-DRA/HLA-DMB/TLR2/CD14/CTSS/SYK	11
		hsa04620	Toll-like receptor signaling pathway	8/166	104/8109	0.00126679	0.0117178	0.00944534	SPP1/CXCL8/TLR8/CCL5/CCL4/TLR2/CD14/LY96	8
		hsa04650	Natural killer cell mediated cytotoxicity	9/166	131/8109	0.0014218	0.0126256	0.0101771	RAC2/FCER1G/GZMB/FCGR3B/SHC4/HCST/TYROBP/LCK/SYK	9
		hsa05332	Graft-versus-host disease	5/166	42/8109	0.00156055	0.0133247	0.0107406	GZMB/HLA-DMA/HLA-DPA1/HLA-DRA/HLA-DMB	5
		hsa04940	Type I diabetes mellitus	5/166	43/8109	0.00173709	0.0142828	0.0115129	GZMB/HLA-DMA/HLA-DPA1/HLA-DRA/HLA-DMB	5
		hsa04670	Leukocyte transendothelial migration	8/166	114/8109	0.00227844	0.0180647	0.0145614	CXCL12/RAC2/MMP9/THY1/VCAM1/ITGA4/CXCR4/ITK	8
		hsa04514	Cell adhesion molecules	9/166	149/8109	0.0034318	0.026271	0.0211763	VCAM1/SDC1/IGSF11/CD2/HLA-DMA/ITGA4/HLA-DPA1/HLA-DRA/HLA-DMB	9
		hsa05320	Autoimmune thyroid disease	5/166	53/8109	0.00439545	0.0325263	0.0262185	GZMB/HLA-DMA/HLA-DPA1/HLA-DRA/HLA-DMB	5
		hsa04926	Relaxin signaling pathway	8/166	129/8109	0.00487709	0.0349262	0.028153	COL4A4/MMP9/COL4A1/MMP1/COL4A2/SHC4/MMP13/GNA15	8
		hsa04612	Antigen processing and presentation	6/166	78/8109	0.00512049	0.0355234	0.0286343	CTSB/HLA-DMA/HLA-DPA1/HLA-DRA/HLA-DMB/CTSS	6
		hsa05322	Systemic lupus erythematosus	8/166	136/8109	0.00667892	0.0449309	0.0362174	CTSG/C6/FCGR3B/HLA-DMA/HLA-DPA1/C7/HLA-DRA/HLA-DMB	8
		hsa05416	Viral myocarditis	5/166	60/8109	0.00746172	0.0487206	0.0392722	RAC2/HLA-DMA/HLA-DPA1/HLA-DRA/HLA-DMB	5
DO		DOID:8398	osteoarthritis	30/216	187/8007	1.3531e-15	9.2146e-13	5.92515e-13	FHL2/CXCL12/SPP1/CTSB/MMP9/PLAU/CHI3L1/HMOX1/MMP1/SULF1/CCL11/PRG4/LPAR1/CXCL8/TIMP4/TNFAIP6/TNFRSF11B/CXCL13/CCL5/ADIPOQ/MMP13/PTGDS/ADAMTS5/TPSAB1/TAC1/SOX9/COMP/HPSE/CTSS/FAP	30
		DOID:850	lung disease	45/216	499/8007	2.8618e-13	9.74443e-11	6.26583e-11	CXCL12/PLAUR/S100A9/TNC/MMP12/TREM1/SPP1/VWF/MMP9/C5AR1/HCK/PLAU/CXCL5/VCAM1/CHI3L1/SLPI/HMOX1/CMA1/MMP1/CCL18/FCGR3B/KRT18/SERPINA1/CCL11/SDC1/RNASE2/CXCL8/ADAMDEC1/GREM1/TNFRSF11B/ITGA4/CCL5/ADIPOQ/MMP13/GZMA/CXCR4/FGF2/TAC1/CCR5/TLR2/CD14/ITK/CTSS/LCK/CSTA	45
		DOID:3083	chronic obstructive pulmonary disease	29/216	220/8007	7.81283e-13	1.77351e-10	1.1404e-10	PLAUR/MMP12/TREM1/SPP1/VWF/MMP9/C5AR1/HCK/PLAU/VCAM1/CHI3L1/SLPI/HMOX1/MMP1/KRT18/SERPINA1/CCL11/CXCL8/TNFRSF11B/CCL5/ADIPOQ/MMP13/GZMA/FGF2/CCR5/TLR2/CD14/CTSS/CSTA	29
		DOID:2320	obstructive lung disease	34/216	308/8007	1.27556e-12	2.17165e-10	1.39641e-10	PLAUR/TNC/MMP12/TREM1/SPP1/VWF/MMP9/C5AR1/HCK/PLAU/VCAM1/CHI3L1/SLPI/HMOX1/MMP1/CCL18/KRT18/SERPINA1/CCL11/RNASE2/CXCL8/TNFRSF11B/ITGA4/CCL5/ADIPOQ/MMP13/GZMA/FGF2/CCR5/TLR2/CD14/ITK/CTSS/CSTA	34
		DOID:2349	arteriosclerosis	35/216	356/8007	1.6718e-11	2.277e-09	1.46415e-09	CXCL16/PLTP/FN1/CXCL12/ALDH2/PLAUR/S100A9/TNC/MMP12/SPP1/CTSB/VWF/MMP9/S100A8/PLAU/VCAM1/CHI3L1/HMOX1/MMP1/F5/TNFRSF11B/CCL5/LYZ/ADIPOQ/MNDA/PLA2G7/IL7R/CXCL1/PTGDS/KLRB1/CCR5/TLR2/CD14/CTSS/BRINP3	35
		DOID:2348	arteriosclerotic cardiovascular disease	34/216	345/8007	3.16851e-11	3.59626e-09	2.31245e-09	CXCL16/PLTP/FN1/CXCL12/ALDH2/PLAUR/S100A9/TNC/MMP12/SPP1/CTSB/VWF/MMP9/S100A8/PLAU/VCAM1/CHI3L1/HMOX1/MMP1/F5/TNFRSF11B/CCL5/LYZ/ADIPOQ/MNDA/PLA2G7/IL7R/CXCL1/PTGDS/CCR5/TLR2/CD14/CTSS/BRINP3	34
		DOID:1936	atherosclerosis	33/216	344/8007	1.31994e-10	1.28411e-08	8.25706e-09	CXCL16/PLTP/FN1/CXCL12/ALDH2/PLAUR/S100A9/TNC/MMP12/SPP1/CTSB/VWF/MMP9/S100A8/PLAU/VCAM1/CHI3L1/HMOX1/MMP1/F5/TNFRSF11B/CCL5/ADIPOQ/MNDA/PLA2G7/IL7R/CXCL1/PTGDS/CCR5/TLR2/CD14/CTSS/BRINP3	33
		DOID:5844	myocardial infarction	28/216	279/8007	1.3822e-09	1.1766e-07	7.56572e-08	FN1/CXCL12/ALDH2/PLAUR/S100A9/VWF/MMP9/F10/THBS2/VCAM1/GZMB/HMOX1/MMP1/ADRB1/KRT18/CCL11/CXCL8/ADH1B/F5/TNFRSF11B/ADIPOQ/PLA2G7/CXCR4/FGF2/CCR5/TLR2/CD14/BRINP3	28
		DOID:3393	coronary artery disease	31/216	348/8007	3.17964e-09	2.40593e-07	1.54705e-07	CXCL16/PLTP/FN1/CXCL12/ALDH2/PLAUR/S100A9/SPP1/VWF/MMP9/F10/THBS2/VCAM1/GZMB/HMOX1/MMP1/ADRB1/KRT18/CCL11/CXCL8/ADH1B/F5/TNFRSF11B/ADIPOQ/PLA2G7/CXCR4/FGF2/CCR5/TLR2/CD14/BRINP3	31
		DOID:11335	sarcoidosis	15/216	84/8007	5.12402e-09	3.48946e-07	2.24378e-07	S100A9/TNC/SPP1/S100A8/CXCL5/CHI3L1/IGKC/CMA1/CCL18/ADAMDEC1/GREM1/IL7R/CCR5/TLR2/CD14	15
		DOID:2916	hypersensitivity reaction type IV disease	15/216	88/8007	9.97772e-09	6.17712e-07	3.97199e-07	S100A9/TNC/SPP1/S100A8/CXCL5/CHI3L1/IGKC/CMA1/CCL18/ADAMDEC1/GREM1/IL7R/CCR5/TLR2/CD14	15
		DOID:3082	interstitial lung disease	20/216	170/8007	2.54883e-08	1.34059e-06	8.62024e-07	CXCL12/S100A9/MMP12/TREM1/MMP9/PLAU/CXCL5/HMOX1/MMP1/CCL18/FCGR3B/SERPINA1/CCL11/SDC1/CXCL8/ADAMDEC1/GREM1/CCL5/CXCR4/CCR5	20
		DOID:552	pneumonia	16/216	108/8007	2.55913e-08	1.34059e-06	8.62024e-07	CXCL12/TNC/TREM1/SPP1/MMP9/PLAU/SLPI/HMOX1/CMA1/MMP1/CCL18/SERPINA1/CXCL8/CXCR4/TAC1/CD14	16
		DOID:3388	periodontal disease	18/216	139/8007	2.92574e-08	1.42316e-06	9.15118e-07	ALDH2/MMP12/MMP9/S100A8/PLAU/MMP1/FCGR3B/CXCL8/TNFRSF11B/CCL5/LYZ/MMP13/FGF2/CCR5/CTSC/TLR2/CD14/BRINP3	18
		DOID:201	connective tissue cancer	30/216	370/8007	5.11836e-08	2.32374e-06	1.4942e-06	FN1/LUM/CXCL12/PLAUR/TNC/SPP1/CTSB/MMP9/WIF1/PLAU/KIT/ID1/CMA1/MMP1/TGFBI/LPAR1/CXCL8/TNFRSF11B/ITGA4/CCL5/TFPI2/MMP13/BTC/TPSAB1/ENPP2/CXCR4/FGF2/CD14/SOX9/SYK	30
		DOID:1091	tooth disease	19/216	162/8007	6.09329e-08	2.59346e-06	1.66764e-06	ALDH2/MMP12/MMP9/S100A8/PLAU/FAM20A/MMP1/FCGR3B/CXCL8/TNFRSF11B/CCL5/LYZ/MMP13/FGF2/CCR5/CTSC/TLR2/CD14/BRINP3	19
		DOID:0050338	primary bacterial infectious disease	23/216	238/8007	9.22848e-08	3.69682e-06	2.37712e-06	PLAUR/TNC/TREM1/VWF/MMP9/C5AR1/CTSG/MMP1/CCL11/CXCL8/TNFRSF11B/CCL5/MMP13/CD27/GZMA/CCL4/CXCR4/CCR5/TLR2/CD14/LCK/BCL2A1/LY96	23
		DOID:824	periodontitis	16/216	120/8007	1.17182e-07	4.43338e-06	2.85074e-06	ALDH2/MMP12/MMP9/S100A8/MMP1/FCGR3B/CXCL8/TNFRSF11B/CCL5/LYZ/FGF2/CCR5/CTSC/TLR2/CD14/BRINP3	16
		DOID:403	mouth disease	20/216	188/8007	1.39386e-07	4.99589e-06	3.21244e-06	ALDH2/MMP12/MMP9/S100A8/PLAU/FAM20A/SLPI/MMP1/FCGR3B/CXCL8/TNFRSF11B/CCL5/LYZ/MMP13/FGF2/CCR5/CTSC/TLR2/CD14/BRINP3	20
		DOID:350	mastocytosis	10/216	44/8007	1.84402e-07	6.08657e-06	3.91377e-06	CTSG/KIT/KLF4/CCL11/CXCL8/TPSB2/CCL5/TPSAB1/CXCR4/FGF2	10
		DOID:4960	bone marrow cancer	27/216	328/8007	1.87691e-07	6.08657e-06	3.91377e-06	FN1/CXCL12/PLAUR/SPP1/HCK/PLAU/VCAM1/KIT/ID1/MMP1/FCGR3B/IGHM/SDC1/SFRP2/CXCL8/ACP5/F5/TNFRSF11B/ITGA4/SLAMF7/MMP13/CCL4/CXCR4/FGF2/TNFRSF17/TAC1/CCR5	27
		DOID:37	skin disease	28/216	350/8007	1.98213e-07	6.11815e-06	3.93408e-06	PLAUR/PPBP/CD93/MMP12/CCL19/MMP9/PLAU/KIT/HMOX1/MMP1/CCL18/KRT18/CCL11/RNASE2/CXCL8/GJB2/CCL5/ADIPOQ/IL7R/TPSAB1/PLIN1/KRT14/TAC1/TLR2/ALDH1A1/BCL2A1/SYK/CSTA	28
		DOID:16	integumentary system disease	30/216	394/8007	2.06634e-07	6.11815e-06	3.93408e-06	PLAUR/PPBP/CD93/MMP12/CCL19/MMP9/PLAU/KIT/HMOX1/MMP1/CCL18/KRT18/CCL11/RNASE2/CXCL8/GJB2/FCGR1B/CCL5/ADIPOQ/IL7R/TPSAB1/PLIN1/KRT14/TAC1/TLR2/SOX9/ALDH1A1/BCL2A1/SYK/CSTA	30
		DOID:104	bacterial infectious disease	24/216	271/8007	2.48724e-07	7.05755e-06	4.53813e-06	CXCL16/PLAUR/TNC/TREM1/VWF/MMP9/C5AR1/CTSG/MMP1/CCL11/CXCL8/TNFRSF11B/CCL5/MMP13/CD27/GZMA/CCL4/CXCR4/CCR5/TLR2/CD14/LCK/BCL2A1/LY96	24
		DOID:2462	retinal vascular disease	11/216	58/8007	3.19162e-07	8.35959e-06	5.37536e-06	CXCL12/TNC/VWF/MMP9/VCAM1/KIT/MMP1/CXCL8/CCL5/PLIN1/FGF2	11
		DOID:8947	diabetic retinopathy	11/216	58/8007	3.19162e-07	8.35959e-06	5.37536e-06	CXCL12/TNC/VWF/MMP9/VCAM1/KIT/MMP1/CXCL8/CCL5/PLIN1/FGF2	11
		DOID:0070004	myeloma	26/216	323/8007	4.99737e-07	1.26045e-05	8.10489e-06	FN1/CXCL12/PLAUR/SPP1/HCK/PLAU/VCAM1/KIT/MMP1/FCGR3B/IGHM/SDC1/SFRP2/CXCL8/ACP5/F5/TNFRSF11B/ITGA4/SLAMF7/MMP13/CCL4/CXCR4/FGF2/TNFRSF17/TAC1/CCR5	26
		DOID:0060100	musculoskeletal system cancer	31/216	439/8007	6.72953e-07	1.63672e-05	1.05244e-05	FN1/LUM/CXCL12/PLAUR/TNC/SPP1/CTSB/MMP9/WIF1/PLAU/KIT/ID1/CMA1/MMP1/TGFBI/LPAR1/CXCL8/TNFRSF11B/ITGA4/CCL5/TFPI2/MMP13/BTC/TPSAB1/ENPP2/CXCR4/FGF2/CD14/SOX9/HPSE/SYK	31
		DOID:184	bone cancer	21/216	243/8007	2.18531e-06	5.13171e-05	3.29978e-05	FN1/LUM/CXCL12/TNC/SPP1/CTSB/MMP9/WIF1/PLAU/KIT/MMP1/TGFBI/LPAR1/CXCL8/TNFRSF11B/ITGA4/CCL5/MMP13/CXCR4/FGF2/SYK	21
		DOID:3068	glioblastoma multiforme	11/216	70/8007	2.28249e-06	5.18126e-05	3.33164e-05	CXCL12/PLAUR/TNC/MMP9/PLAU/KIT/AQP9/CXCL8/IGFBP4/NDRG2/IGFBP2	11
		DOID:1176	bronchial disease	16/216	153/8007	3.2824e-06	7.21068e-05	4.63659e-05	S100A9/TNC/MMP9/PLAU/SLPI/MMP1/CCL18/SERPINA1/CCL11/RNASE2/CXCL8/ITGA4/CCL5/TLR2/CD14/ITK	16
		DOID:526	Human immunodeficiency virus infectious disease	17/216	173/8007	3.79796e-06	8.08253e-05	5.19721e-05	CXCL12/PLAUR/CCL19/VCAM1/SLPI/GZMB/CCL18/SERPINA1/CXCL13/CCL5/IL7R/CD27/CCL4/CXCR4/CCR1/CCR5/ITK	17
		DOID:2237	hepatitis	29/216	431/8007	4.23027e-06	8.58304e-05	5.51904e-05	CXCL16/CXCL12/PLAUR/SPP1/MMP9/PLAU/VCAM1/CHI3L1/GZMB/HMOX1/KRT18/SERPINA1/SDC1/CXCL8/HLA-DPA1/CCL5/ADIPOQ/CD27/KLRB1/ENPP2/CCL4/CXCR4/FGF2/CCR1/CCR5/TLR2/CD14/LCK/FAP	29
		DOID:1883	hepatitis C	20/216	233/8007	4.28522e-06	8.58304e-05	5.51904e-05	SPP1/MMP9/HMOX1/KRT18/SERPINA1/SDC1/CXCL8/CCL5/ADIPOQ/CD27/KLRB1/ENPP2/CCL4/FGF2/CCR1/CCR5/TLR2/CD14/LCK/FAP	20
		DOID:3213	demyelinating disease	17/216	175/8007	4.44449e-06	8.64772e-05	5.56063e-05	CXCL12/MMP12/MMP9/CHI3L1/GZMB/HMOX1/FCGR3B/CXCL8/ITGA4/CCL5/C7/IL7R/HLA-DRA/CCR1/CCR5/IGFBP2/CD14	17
		DOID:3770	pulmonary fibrosis	14/216	123/8007	5.08868e-06	9.47983e-05	6.09569e-05	CXCL12/S100A9/MMP12/TREM1/MMP9/PLAU/HMOX1/MMP1/CCL18/FCGR3B/CCL11/SDC1/CCL5/CXCR4	14
		DOID:4971	myelofibrosis	9/216	49/8007	5.15057e-06	9.47983e-05	6.09569e-05	FN1/CXCL12/KIT/CXCL8/TNFRSF11B/MMP13/CXCR4/FGF2/TAC1	9
		DOID:557	kidney disease	30/216	461/8007	5.57847e-06	9.9615e-05	6.40542e-05	CXCL16/FN1/ALDH2/PLAUR/S100A9/COL4A4/SPP1/MMP9/F10/S100A8/PLAU/VCAM1/COL4A1/CHI3L1/KIT/HMOX1/MMP1/FCGR3B/KRT18/CXCL8/ACP5/F5/GREM1/TNFRSF11B/CXCL13/CCL5/ADIPOQ/PTGDS/CCR5/HPSE	30
		DOID:9408	acute myocardial infarction	12/216	92/8007	5.9324e-06	9.9615e-05	6.40542e-05	FN1/PLAUR/MMP9/F10/HMOX1/ADRB1/KRT18/F5/TNFRSF11B/ADIPOQ/CCR5/CD14	12
		DOID:9500	leukocyte disease	12/216	92/8007	5.9324e-06	9.9615e-05	6.40542e-05	CTSG/KIT/KLF4/CCL11/RNASE2/CXCL8/TLR8/TPSB2/CCL5/TPSAB1/CXCR4/FGF2	12
		DOID:349	systemic mastocytosis	8/216	38/8007	5.99738e-06	9.9615e-05	6.40542e-05	KIT/KLF4/CCL11/CXCL8/CCL5/TPSAB1/CXCR4/FGF2	8
		DOID:1040	chronic lymphocytic leukemia	19/216	221/8007	7.35384e-06	0.000119237	7.66716e-05	CXCL12/CCL19/MMP9/CD52/IGHM/CCL11/SDC1/CXCL8/CD2/HCLS1/IGHD/ITGA4/CXCL13/CCL4/CXCR4/FGF2/CD14/BCL2A1/SYK	19
		DOID:9538	multiple myeloma	21/216	264/8007	8.11322e-06	0.000128491	8.26218e-05	CXCL12/PLAUR/SPP1/HCK/PLAU/VCAM1/KIT/MMP1/FCGR3B/IGHM/SDC1/SFRP2/ACP5/TNFRSF11B/ITGA4/SLAMF7/CCL4/CXCR4/FGF2/TNFRSF17/CCR5	21
		DOID:4798	aggressive systemic mastocytosis	7/216	29/8007	8.87993e-06	0.000137437	8.83744e-05	KLF4/CCL11/CXCL8/CCL5/TPSAB1/CXCR4/FGF2	7
		DOID:18	urinary system disease	30/216	478/8007	1.1441e-05	0.000173141	0.000111333	CXCL16/FN1/ALDH2/PLAUR/S100A9/COL4A4/SPP1/MMP9/F10/S100A8/PLAU/VCAM1/COL4A1/CHI3L1/KIT/HMOX1/MMP1/FCGR3B/KRT18/CXCL8/ACP5/F5/GREM1/TNFRSF11B/CXCL13/CCL5/ADIPOQ/PTGDS/CCR5/HPSE	30
		DOID:2377	multiple sclerosis	16/216	169/8007	1.19073e-05	0.00017628	0.000113351	CXCL12/MMP12/MMP9/CHI3L1/GZMB/HMOX1/FCGR3B/CXCL8/ITGA4/CCL5/C7/IL7R/HLA-DRA/CCR1/CCR5/CD14	16
		DOID:6000	congestive heart failure	19/216	229/8007	1.22829e-05	0.000177971	0.000114438	CXCL16/SPP1/VWF/MMP9/CTSG/VCAM1/CHI3L1/HMOX1/MMP1/FCGR3B/ADRB1/TIMP4/TNFRSF11B/ADIPOQ/PLA2G7/STC1/MMP13/FGF2/CD14	19
		DOID:4450	renal cell carcinoma	24/216	342/8007	1.5253e-05	0.000216402	0.00013915	CXCL16/CXCL12/PLAUR/TNC/SPP1/MMP9/WIF1/PLAU/KIT/MMP1/FCGR3B/KRT18/SFRP2/CXCL8/IGFBP4/GREM1/NDRG2/ADIPOQ/TFPI2/MMP13/CXCR4/FGF2/IGFBP2/HPSE	24
		DOID:229	female reproductive system disease	17/216	193/8007	1.64939e-05	0.000229231	0.0001474	CXCL12/TNC/MMP12/CTSB/MMP9/PLAU/CXCL5/MMP1/AQP9/CXCL8/F5/TNFRSF11B/CXCL13/CCL5/MMP13/CXCL1/TLR2	17
		DOID:4138	bile duct disease	11/216	86/8007	1.76726e-05	0.000240701	0.000154775	CXCL16/TREM1/SPP1/HMOX1/KRT18/SERPINA1/CCL5/TAC1/CCR5/TLR2/CD14	11
		DOID:3347	osteosarcoma	18/216	215/8007	1.85699e-05	0.000247962	0.000159444	FN1/LUM/CXCL12/SPP1/CTSB/MMP9/WIF1/KIT/TGFBI/LPAR1/CXCL8/TNFRSF11B/ITGA4/CCL5/MMP13/CXCR4/FGF2/SYK	18
		DOID:9741	biliary tract disease	11/216	87/8007	1.97578e-05	0.000258751	0.000166382	CXCL16/TREM1/SPP1/HMOX1/KRT18/SERPINA1/CCL5/TAC1/CCR5/TLR2/CD14	11
		DOID:865	vasculitis	13/216	122/8007	2.28897e-05	0.000294111	0.000189118	CXCL12/S100A9/VWF/MMP9/CXCL5/GZMB/HMOX1/FCGR3B/SERPINA1/CXCL8/F5/CXCL13/CCR5	13
		DOID:854	collagen disease	17/216	201/8007	2.79935e-05	0.000353029	0.000227004	CXCL16/PLAUR/MMP12/TREM1/SPP1/MMP9/PLAU/COL5A2/CTSG/COL5A1/MMP1/CCL18/TIMP4/ENPP2/CXCR4/FGF2/COMP	17
		DOID:3627	aortic aneurysm	9/216	60/8007	2.86486e-05	0.000354721	0.000228092	FN1/MMP9/IGKC/GZMB/CXCL8/TNFRSF11B/ADIPOQ/CCR5/HPSE	9
		DOID:4451	renal carcinoma	25/216	380/8007	3.01222e-05	0.000366307	0.000235542	CXCL16/CXCL12/PLAUR/TNC/SPP1/MMP9/WIF1/PLAU/KIT/MMP1/FCGR3B/KRT18/SFRP2/CXCL8/IGFBP4/GREM1/NDRG2/ADIPOQ/TFPI2/MMP13/CXCR4/FGF2/IGFBP2/HPSE/LCK	25
		DOID:520	aortic disease	9/216	61/8007	3.28303e-05	0.000392236	0.000252214	FN1/MMP9/IGKC/GZMB/CXCL8/TNFRSF11B/ADIPOQ/CCR5/HPSE	9
		DOID:7693	abdominal aortic aneurysm	8/216	49/8007	4.28427e-05	0.000503032	0.000323458	MMP9/IGKC/GZMB/CXCL8/TNFRSF11B/ADIPOQ/CCR5/HPSE	8
		DOID:3069	astrocytoma	12/216	112/8007	4.49371e-05	0.00051868	0.000333521	CXCL12/PLAUR/TNC/MMP9/PLAU/KIT/MMP1/AQP9/CXCL8/IGFBP4/NDRG2/IGFBP2	12
		DOID:9471	meningitis	6/216	26/8007	5.26685e-05	0.000597788	0.000384388	MMP9/PLAU/CXCL5/CHI3L1/CXCL8/TLR2	6
		DOID:2841	asthma	13/216	134/8007	6.19543e-05	0.000691654	0.000444745	TNC/MMP9/PLAU/SLPI/CCL18/CCL11/RNASE2/CXCL8/ITGA4/CCL5/TLR2/CD14/ITK	13
		DOID:1273	respiratory syncytial virus infectious disease	5/216	17/8007	6.47625e-05	0.000711342	0.000457405	MMP9/GZMB/CXCL8/CCL5/GZMA	5
		DOID:612	primary immunodeficiency disease	16/216	196/8007	7.4264e-05	0.000802758	0.000516187	CXCL12/PLAUR/PLAU/FCGR3B/SERPINA1/SDC1/TNFRSF11B/CCL5/IL7R/CD3D/CXCR4/CCR5/CTSC/TLR2/HPSE/ITK	16
		DOID:399	tuberculosis	14/216	156/8007	7.63864e-05	0.000812799	0.000522644	TNC/MMP9/CTSG/MMP1/CXCL8/CCL5/CD27/GZMA/CCL4/CXCR4/TLR2/CD14/BCL2A1/LY96	14
		DOID:9446	cholangitis	6/216	28/8007	8.23812e-05	0.000863102	0.000554989	CXCL16/TREM1/KRT18/CCL5/CCR5/TLR2	6
		DOID:5082	liver cirrhosis	17/216	220/8007	8.78064e-05	0.000906002	0.000582575	FN1/CXCL12/MMP9/VCAM1/RELN/KRT18/SERPINA1/CXCL8/TNFRSF11B/ADIPOQ/IL7R/CD27/FGF2/CCR1/CCR5/TLR2/CD14	17
		DOID:263	kidney cancer	26/216	437/8007	0.000112813	0.00114665	0.000737317	CXCL16/CXCL12/PLAUR/TNC/SPP1/MMP9/WIF1/PLAU/KIT/MMP1/FCGR3B/KRT18/SFRP2/CXCL8/IGFBP4/GREM1/NDRG2/ADIPOQ/TFPI2/MMP13/CXCR4/FGF2/IGFBP2/SOX9/HPSE/LCK	26
		DOID:5409	lung small cell carcinoma	9/216	72/8007	0.000124625	0.00124808	0.000802539	CXCL12/PLAUR/MMP9/PLAU/KIT/KRT18/CXCL8/CXCR4/IGFBP2	9
		DOID:3070	malignant glioma	16/216	207/8007	0.000141605	0.00139758	0.000898666	CXCL12/PLAUR/TNC/MMP12/MMP9/BEX2/PLAU/KIT/MMP1/SDC1/AQP9/CXCL8/IGFBP4/NDRG2/IGFBP2/BEX1	16
		DOID:2089	constipation	4/216	11/8007	0.000146449	0.00140468	0.000903231	S100A8/KIT/AQP9/TAC1	4
		DOID:9779	bowel dysfunction	4/216	11/8007	0.000146449	0.00140468	0.000903231	S100A8/KIT/AQP9/TAC1	4
		DOID:13406	pulmonary sarcoidosis	5/216	20/8007	0.000151873	0.00143646	0.00092367	CXCL5/CCL18/ADAMDEC1/GREM1/CCR5	5
		DOID:1575	rheumatic disease	15/216	188/8007	0.000161397	0.00146548	0.000942332	CXCL16/PLAUR/MMP12/TREM1/SPP1/MMP9/PLAU/CTSG/MMP1/CCL18/TIMP4/ENPP2/CXCR4/FGF2/COMP	15
		DOID:418	systemic scleroderma	15/216	188/8007	0.000161397	0.00146548	0.000942332	CXCL16/PLAUR/MMP12/TREM1/SPP1/MMP9/PLAU/CTSG/MMP1/CCL18/TIMP4/ENPP2/CXCR4/FGF2/COMP	15
		DOID:419	scleroderma	15/216	188/8007	0.000161397	0.00146548	0.000942332	CXCL16/PLAUR/MMP12/TREM1/SPP1/MMP9/PLAU/CTSG/MMP1/CCL18/TIMP4/ENPP2/CXCR4/FGF2/COMP	15
		DOID:3996	urinary system cancer	28/216	500/8007	0.000171167	0.00151396	0.000973503	CXCL16/CXCL12/PLAUR/TNC/SPP1/MMP9/WIF1/PLAU/KIT/ID1/MMP1/FCGR3B/KRT18/SFRP2/CXCL8/IGFBP4/GREM1/TNFRSF11B/NDRG2/ADIPOQ/TFPI2/MMP13/CXCR4/FGF2/IGFBP2/SOX9/HPSE/LCK	28
		DOID:2723	dermatitis	15/216	189/8007	0.000171182	0.00151396	0.000973503	PLAUR/CCL19/MMP9/PLAU/HMOX1/CCL18/CCL11/RNASE2/CCL5/IL7R/TAC1/TLR2/ALDH1A1/BCL2A1/CSTA	15
		DOID:1307	dementia	13/216	150/8007	0.000196141	0.00171246	0.00110114	PLAUR/SPP1/MAOA/C5AR1/RELN/SERPINA1/CXCL8/TREM2/PTGDS/TYROBP/CXCR4/TAC1/NR4A2	13
		DOID:6432	pulmonary hypertension	9/216	77/8007	0.000210218	0.00181214	0.00116523	CXCL12/TNC/VWF/MAOA/HMOX1/ID1/GREM1/PLA2G7/FGF2	9
		DOID:3355	fibrosarcoma	6/216	33/8007	0.000216384	0.00184196	0.00118442	MMP9/KIT/CMA1/TFPI2/TPSAB1/ENPP2	6
		DOID:3310	atopic dermatitis	13/216	152/8007	0.000223813	0.00188168	0.00120996	PLAUR/PLAU/HMOX1/CCL18/CCL11/RNASE2/CCL5/IL7R/TAC1/TLR2/ALDH1A1/BCL2A1/CSTA	13
		DOID:3908	non-small cell lung carcinoma	25/216	431/8007	0.000228747	0.00189972	0.00122155	FN1/LUM/CXCL12/S100A9/TNC/SPP1/MMP9/WIF1/IBSP/S100A8/PLAU/KIT/GZMB/HMOX1/KRT18/CXCL8/TLR8/CCL5/TFPI2/CXCR4/CCR5/TUBB2B/CD14/SOX9/CSTA	25
		DOID:2043	hepatitis B	15/216	197/8007	0.000269814	0.00221377	0.00142349	PLAUR/MMP9/PLAU/CHI3L1/GZMB/HMOX1/KRT18/HLA-DPA1/CCL5/ADIPOQ/CXCR4/CCR1/CCR5/TLR2/CD14	15
		DOID:6713	cerebrovascular disease	11/216	116/8007	0.000279728	0.0022678	0.00145823	SPP1/CTSB/MMP9/COL4A1/ADH1B/F5/TNFRSF11B/ADIPOQ/PLA2G7/FGF2/CCR5	11
		DOID:374	nutrition disease	21/216	338/8007	0.000297501	0.00237301	0.00152589	S100A9/ATP1A2/SPP1/MMP9/MAOA/S100A8/CXCL5/VCAM1/ADRA2A/ADRB1/AQP9/CXCL8/OTC/ACP5/TNFRSF11B/ADIPOQ/ENPP2/PLIN1/IGFBP2/TLR2/CTSS	21
		DOID:4989	pancreatitis	11/216	117/8007	0.000301569	0.00237301	0.00152589	ALDH2/TREM1/SPP1/CTSB/MMP9/SERPINA1/CXCL8/ADH1B/ADIPOQ/TLR2/CD14	11
		DOID:13207	proliferative diabetic retinopathy	6/216	35/8007	0.00030316	0.00237301	0.00152589	CXCL12/VWF/MMP9/VCAM1/KIT/FGF2	6
		DOID:9563	bronchiectasis	4/216	14/8007	0.000416758	0.00316776	0.00203692	MMP9/MMP1/SERPINA1/TLR2	4
		DOID:654	overnutrition	20/216	322/8007	0.000417304	0.00316776	0.00203692	S100A9/ATP1A2/SPP1/MMP9/MAOA/S100A8/CXCL5/VCAM1/ADRA2A/ADRB1/AQP9/CXCL8/ACP5/TNFRSF11B/ADIPOQ/ENPP2/PLIN1/IGFBP2/TLR2/CTSS	20
		DOID:10534	stomach cancer	18/216	274/8007	0.000418647	0.00316776	0.00203692	CXCL12/PLAUR/SPP1/MMP9/S100A8/PLAU/CXCL5/SLPI/HMOX1/KLF4/ID1/MMP1/SDC1/CEMIP/CXCL8/CCL5/CCL4/IGFBP2	18
		DOID:9415	allergic asthma	7/216	52/8007	0.000449494	0.00336379	0.00216298	MMP9/SLPI/CCL18/RNASE2/TLR2/CD14/ITK	7
		DOID:13241	Behcet's disease	9/216	86/8007	0.000485949	0.00359708	0.00231298	CXCL12/VWF/MMP9/GZMB/HMOX1/CXCL8/F5/CXCL13/CCR5	9
		DOID:13378	Kawasaki disease	7/216	54/8007	0.000568499	0.00416288	0.0026768	S100A9/MMP9/S100A8/GZMB/MMP1/MMP13/CCR5	7
		DOID:289	endometriosis	9/216	88/8007	0.00057633	0.00417533	0.00268481	TNC/MMP12/MMP9/PLAU/CXCL5/MMP1/CXCL8/CCL5/MMP13	9
		DOID:655	inherited metabolic disorder	20/216	331/8007	0.000593798	0.00425659	0.00273706	FN1/LUM/CXCL12/PLAUR/VWF/MMP9/CD52/VCAM1/KIT/HMOX1/CCL18/KRT18/SERPINA1/CXCL8/TNFRSF11B/ITGA4/CCL5/ADIPOQ/PLIN1/CCR5	20
		DOID:635	acquired immunodeficiency syndrome	8/216	71/8007	0.000607771	0.00431138	0.00277229	CXCL12/PLAUR/SLPI/CCL18/CCL5/CCL4/CXCR4/CCR5	8
		DOID:26	pancreas disease	13/216	171/8007	0.000700456	0.00491763	0.00316212	ALDH2/TREM1/SPP1/CTSB/MMP9/VCAM1/SERPINA1/CXCL8/ADH1B/TNFRSF11B/ADIPOQ/TLR2/CD14	13
		DOID:1398	parasitic infectious disease	12/216	150/8007	0.000713947	0.0049612	0.00319014	CTSB/VWF/C5AR1/HMOX1/MMP1/CCL18/KRT18/CCL11/CCL5/TAC1/CCR5/TLR2	12
		DOID:11729	Lyme disease	4/216	16/8007	0.000726237	0.00499563	0.00321227	MMP9/MMP1/MMP13/TLR2	4
		DOID:2394	ovarian cancer	19/216	312/8007	0.000741085	0.00504679	0.00324517	FHL2/PLAUR/MMP12/MMP9/PLAU/THY1/CHI3L1/KIT/ID1/MMP1/CCL18/CCL11/SDC1/CXCL8/MMP13/CXCL1/CXCR4/IGFBP2/ALDH1A1	19
		DOID:9970	obesity	19/216	313/8007	0.000770338	0.00519406	0.00333987	S100A9/SPP1/MMP9/MAOA/S100A8/CXCL5/VCAM1/ADRA2A/ADRB1/AQP9/CXCL8/ACP5/TNFRSF11B/ADIPOQ/ENPP2/PLIN1/IGFBP2/TLR2/CTSS	19
		DOID:2213	hemorrhagic disease	12/216	152/8007	0.000803232	0.00536276	0.00344835	VWF/MMP9/PLAU/HMOX1/FCGR3B/CXCL8/F5/CCL5/HLA-DRA/CXCR4/FGF2/TLR2	12
		DOID:1602	lymphadenitis	7/216	58/8007	0.000881115	0.00576961	0.00370996	S100A9/MMP9/S100A8/GZMB/MMP1/MMP13/CCR5	7
		DOID:9942	lymph node disease	7/216	58/8007	0.000881115	0.00576961	0.00370996	S100A9/MMP9/S100A8/GZMB/MMP1/MMP13/CCR5	7
		DOID:9675	pulmonary emphysema	4/216	17/8007	0.000929767	0.0060302	0.00387753	MMP12/MMP9/MMP1/CTSS	4
		DOID:3007	breast ductal carcinoma	5/216	29/8007	0.000954522	0.00613235	0.00394321	S100A9/S100A8/PLAU/KRT18/CXCL8	5
		DOID:1192	peripheral nervous system neoplasm	22/216	396/8007	0.000981797	0.00624864	0.00401798	SCG2/FHL2/CXCL12/TNC/HAND2-AS1/MMP9/ATP1B1/WASF3/KIT/HMOX1/RELN/KLF4/ID1/TGFBI/TFPI2/MMP13/ZNF423/CXCR4/FGF2/TAC1/IGFBP2/SOX9	22
		DOID:1074	kidney failure	12/216	156/8007	0.00100998	0.00636851	0.00409506	FN1/ALDH2/S100A9/COL4A4/SPP1/S100A8/MMP1/FCGR3B/TNFRSF11B/CCL5/ADIPOQ/PTGDS	12
		DOID:1247	blood coagulation disease	13/216	180/8007	0.00112939	0.00705607	0.00453717	VWF/MMP9/F10/PLAU/HMOX1/FCGR3B/CXCL8/F5/CCL5/HLA-DRA/CXCR4/FGF2/TLR2	13
		DOID:10124	corneal disease	7/216	62/8007	0.00131585	0.0081463	0.00523821	PLAUR/COL4A4/MMP9/SLPI/TGFBI/ADH1B/TPSAB1	7
		DOID:4481	allergic rhinitis	9/216	99/8007	0.00135251	0.00829785	0.00533566	VCAM1/HMOX1/CXCL8/CCL5/ADIPOQ/TAC1/TLR2/CD14/ITK	9
		DOID:2731	vesiculobullous skin disease	4/216	19/8007	0.0014514	0.00882501	0.00567463	MMP1/KRT18/CCL11/KRT14	4
		DOID:2163	nasal cavity disease	9/216	101/8007	0.00155774	0.00917193	0.00589771	VCAM1/HMOX1/CXCL8/CCL5/ADIPOQ/TAC1/TLR2/CD14/ITK	9
		DOID:2825	nose disease	9/216	101/8007	0.00155774	0.00917193	0.00589771	VCAM1/HMOX1/CXCL8/CCL5/ADIPOQ/TAC1/TLR2/CD14/ITK	9
		DOID:4483	rhinitis	9/216	101/8007	0.00155774	0.00917193	0.00589771	VCAM1/HMOX1/CXCL8/CCL5/ADIPOQ/TAC1/TLR2/CD14/ITK	9
		DOID:5679	retinal disease	20/216	358/8007	0.00156233	0.00917193	0.00589771	CXCL12/TNC/VWF/MMP9/ANGPTL7/VCAM1/KIT/NDP/MYOC/MMP1/ADRB1/CXCL8/GREM1/CCL5/ADIPOQ/PLIN1/FGF2/CCR5/VLDLR/TLR2	20
		DOID:345	uterine disease	6/216	48/8007	0.00171245	0.00996731	0.00640915	MMP9/AQP9/CXCL8/F5/CXCL13/CXCL1	6
		DOID:2151	malignant ovarian surface epithelial-stromal neoplasm	17/216	286/8007	0.00182449	0.010354	0.0066578	FHL2/MMP12/MMP9/PLAU/THY1/CHI3L1/KIT/MMP1/CCL18/CCL11/SDC1/CXCL8/MMP13/CXCL1/CXCR4/IGFBP2/ALDH1A1	17
		DOID:2152	ovary epithelial cancer	17/216	286/8007	0.00182449	0.010354	0.0066578	FHL2/MMP12/MMP9/PLAU/THY1/CHI3L1/KIT/MMP1/CCL18/CCL11/SDC1/CXCL8/MMP13/CXCL1/CXCR4/IGFBP2/ALDH1A1	17
		DOID:4001	ovarian carcinoma	17/216	286/8007	0.00182449	0.010354	0.0066578	FHL2/MMP12/MMP9/PLAU/THY1/CHI3L1/KIT/MMP1/CCL18/CCL11/SDC1/CXCL8/MMP13/CXCL1/CXCR4/IGFBP2/ALDH1A1	17
		DOID:3620	central nervous system cancer	10/216	124/8007	0.00185276	0.0103682	0.00666696	CXCL12/PLAUR/RAC2/MMP9/PLAU/AQP9/CXCL13/NDRG2/PTGDS/FAP	10
		DOID:1037	lymphoblastic leukemia	23/216	443/8007	0.00185745	0.0103682	0.00666696	CXCL12/CCL19/MMP9/CD52/CCL18/IGHM/CCL11/SDC1/CXCL8/CD2/HCLS1/IGHD/ITGA4/CXCL13/SPOCK3/CCL4/CXCR4/FGF2/TAC1/IGFBP2/CD14/BCL2A1/SYK	23
		DOID:10952	nephritis	11/216	147/8007	0.00203094	0.0112444	0.00723037	CXCL16/COL4A4/SPP1/MMP9/VCAM1/KIT/FCGR3B/GREM1/CXCL13/CCL5/CCR5	11
		DOID:74	hematopoietic system disease	24/216	474/8007	0.00206928	0.0113644	0.00730748	VWF/MMP9/F10/PLAU/CTSG/VCAM1/KIT/HMOX1/KLF4/FCGR3B/CCL11/RNASE2/CXCL8/TLR8/PLVAP/TPSB2/F5/TNFRSF11B/CCL5/HLA-DRA/TPSAB1/CXCR4/FGF2/TLR2	24
		DOID:1115	sarcoma	13/216	193/8007	0.0021199	0.011371	0.00731175	ALDH2/PLAUR/SPP1/MMP9/THBS2/PLAU/KIT/ID1/MMP1/CXCL8/CXCL1/CXCR4/ALDH1A1	13
		DOID:3376	bone osteosarcoma	6/216	50/8007	0.00212058	0.011371	0.00731175	LUM/CXCL12/MMP9/KIT/CXCL8/ITGA4	6
		DOID:627	severe combined immunodeficiency	6/216	50/8007	0.00212058	0.011371	0.00731175	SERPINA1/SDC1/TNFRSF11B/IL7R/CD3D/HPSE	6
		DOID:3702	cervical adenocarcinoma	4/216	21/8007	0.00214835	0.0114299	0.0073496	CXCL12/CHI3L1/SLPI/CXCR4	4
		DOID:2789	parasitic protozoa infectious disease	10/216	127/8007	0.00221402	0.011688	0.00751557	CTSB/VWF/C5AR1/HMOX1/MMP1/CCL18/CCL5/TAC1/CCR5/TLR2	10
		DOID:11054	urinary bladder cancer	9/216	107/8007	0.00232748	0.0121924	0.00783992	PLAUR/MMP9/PLAU/ID1/MMP1/CXCL8/TNFRSF11B/CXCR4/IGFBP2	9
		DOID:4079	heart valve disease	6/216	51/8007	0.00235027	0.0122178	0.00785626	CXCL16/SPP1/VWF/PLAU/TNFRSF11B/CXCR4	6
		DOID:28	endocrine system disease	21/216	399/8007	0.00248606	0.0128258	0.00824721	ALDH2/TREM1/SPP1/CTSB/VWF/MMP9/F10/VCAM1/ADRA2A/KIT/SERPINA1/AQP9/CXCL8/ADH1B/F5/TNFRSF11B/CCL5/ADIPOQ/CCR5/TLR2/CD14	21
		DOID:628	combined T cell and B cell immunodeficiency	6/216	52/8007	0.00259819	0.0133035	0.0085544	SERPINA1/SDC1/TNFRSF11B/IL7R/CD3D/HPSE	6
		DOID:10126	keratoconus	4/216	23/8007	0.00304719	0.0154861	0.00995781	COL4A4/SLPI/TGFBI/ADH1B	4
		DOID:866	vein disease	5/216	38/8007	0.00331413	0.016718	0.0107499	MMP9/HMOX1/SERPINA1/F5/CCL5	5
		DOID:5295	intestinal disease	11/216	157/8007	0.003398	0.0169509	0.0108997	CXCL16/S100A8/VCAM1/KIT/MMP1/SDC1/AQP9/CXCL8/CXCL13/CCL5/TAC1	11
		DOID:10591	pre-eclampsia	16/216	278/8007	0.0034101	0.0169509	0.0108997	VWF/MMP9/TDO2/PLAU/VCAM1/HMOX1/CMA1/MMP1/AQP9/CXCL8/F5/TNFRSF11B/ADIPOQ/TFPI2/ENPP2/TLR2	16
		DOID:438	autoimmune disease of the nervous system	6/216	55/8007	0.00346038	0.0170762	0.0109803	MMP9/GZMB/CXCL13/HLA-DRA/CA3/CD14	6
		DOID:15	reproductive system disease	20/216	386/8007	0.00375325	0.0183882	0.0118239	CXCL12/TNC/MMP12/CTSB/MMP9/PLAU/CXCL5/MMP1/AQP9/CXCL8/F5/TNFRSF11B/ITGA4/CXCL13/CCL5/MMP13/CXCL1/PTGDS/IGFBP2/TLR2	20
		DOID:1485	cystic fibrosis	10/216	138/8007	0.0040513	0.0197067	0.0126717	TREM1/MMP9/PLAU/SLPI/HMOX1/ADRB1/SERPINA1/CXCL8/CCL4/TLR2	10
		DOID:0050904	salivary gland carcinoma	6/216	57/8007	0.00414294	0.0199477	0.0128267	MMP9/CTNNAL1/KIT/ID1/CXCR4/FGF2	6
		DOID:4866	salivary gland adenoid cystic carcinoma	5/216	40/8007	0.00415943	0.0199477	0.0128267	MMP9/KIT/ID1/CXCR4/FGF2	5
		DOID:0060084	cell type benign neoplasm	23/216	475/8007	0.00446696	0.0212252	0.0136481	CXCL12/ALDH2/PLAUR/SPP1/CTSB/VWF/MMP9/WIF1/THBS2/PLAU/COL11A1/HMOX1/COL5A1/MMP1/SFRP2/LPAR1/CXCL8/SELENBP1/CXCR4/FGF2/SOX9/CTSS/CSTA	23
		DOID:3451	skin carcinoma	6/216	58/8007	0.00451931	0.0212252	0.0136481	CXCL12/S100A9/MMP9/MMP1/CXCL8/CCL5	6
		DOID:8850	salivary gland cancer	6/216	58/8007	0.00451931	0.0212252	0.0136481	MMP9/CTNNAL1/KIT/ID1/CXCR4/FGF2	6
		DOID:0060122	integumentary system cancer	8/216	98/8007	0.00483664	0.0224065	0.0144077	CXCL12/S100A9/MMP9/KLF4/MMP1/CXCL8/CCL5/MMP13	8
		DOID:4159	skin cancer	8/216	98/8007	0.00483664	0.0224065	0.0144077	CXCL12/S100A9/MMP9/KLF4/MMP1/CXCL8/CCL5/MMP13	8
		DOID:11077	brucellosis	5/216	42/8007	0.00514843	0.0235308	0.0151307	C5AR1/TNFRSF11B/CCR5/TLR2/CD14	5
		DOID:1319	brain cancer	5/216	42/8007	0.00514843	0.0235308	0.0151307	CXCL12/RAC2/MMP9/AQP9/PTGDS	5
		DOID:11612	polycystic ovary syndrome	11/216	166/8007	0.00518489	0.0235394	0.0151362	PLAUR/MMP9/PRKAR2B/HMOX1/AQP9/ITLN1/F5/TNFRSF11B/ADIPOQ/PLA2G7/PLIN1	11
		DOID:9352	type 2 diabetes mellitus	13/216	215/8007	0.0053585	0.0241665	0.0155395	PLTP/CXCL12/S100A9/ATP1A2/VWF/MMP9/S100A8/CXCL8/CCL5/ADIPOQ/IL7R/PLIN1/LCK	13
		DOID:120	female reproductive organ cancer	22/216	455/8007	0.00548979	0.0245502	0.0157862	FHL2/CXCL12/PLAUR/MMP12/MMP9/S100A8/PLAU/THY1/CHI3L1/KIT/SLPI/ID1/MMP1/CCL18/CCL11/SDC1/CXCL8/MMP13/CXCL1/CXCR4/IGFBP2/ALDH1A1	22
		DOID:1724	duodenal ulcer	4/216	27/8007	0.00555173	0.0245502	0.0157862	MMP9/PLAU/CXCL8/TLR2	4
		DOID:2513	basal cell carcinoma	4/216	27/8007	0.00555173	0.0245502	0.0157862	CXCL12/S100A9/CXCL8/CCL5	4
		DOID:1003	pelvic inflammatory disease	3/216	14/8007	0.00565549	0.0246884	0.0158751	CXCL12/CTSB/MMP9	3
		DOID:13001	carotid stenosis	3/216	14/8007	0.00565549	0.0246884	0.0158751	SPP1/MMP9/TNFRSF11B	3
		DOID:4961	bone marrow disease	5/216	43/8007	0.00570066	0.0247271	0.0158999	MMP9/KIT/PLVAP/F5/TNFRSF11B	5
		DOID:8618	oral cavity cancer	6/216	61/8007	0.00579986	0.024841	0.0159732	MMP9/CTNNAL1/KIT/ID1/CXCR4/FGF2	6
		DOID:75	lymphatic system disease	8/216	101/8007	0.00579988	0.024841	0.0159732	S100A9/MMP9/S100A8/GZMB/MMP1/CCL18/MMP13/CCR5	8
		DOID:2621	autonomic nervous system neoplasm	19/216	375/8007	0.00596129	0.0252152	0.0162138	SCG2/FHL2/CXCL12/HAND2-AS1/MMP9/ATP1B1/WASF3/KIT/HMOX1/RELN/KLF4/ID1/TGFBI/TFPI2/ZNF423/CXCR4/FGF2/TAC1/IGFBP2	19
		DOID:769	neuroblastoma	19/216	375/8007	0.00596129	0.0252152	0.0162138	SCG2/FHL2/CXCL12/HAND2-AS1/MMP9/ATP1B1/WASF3/KIT/HMOX1/RELN/KLF4/ID1/TGFBI/TFPI2/ZNF423/CXCR4/FGF2/TAC1/IGFBP2	19
		DOID:870	neuropathy	12/216	194/8007	0.00616369	0.0259103	0.0166608	ALDH2/VWF/MMP9/CTNNAL1/GZMB/STMN2/PLP1/CXCL13/HLA-DRA/CCR5/CA3/KIF21A	12
		DOID:1555	urticaria	5/216	44/8007	0.0062934	0.0262933	0.016907	PPBP/MMP9/KIT/TPSAB1/SYK	5
		DOID:1168	familial hyperlipidemia	7/216	82/8007	0.00646758	0.0268562	0.017269	FN1/PLAUR/MMP9/CXCL8/CCL5/ADIPOQ/CCR5	7
		DOID:3371	chondrosarcoma	6/216	63/8007	0.00678905	0.0280203	0.0180175	TNC/MMP9/MMP1/MMP13/CXCR4/SOX9	6
		DOID:974	upper respiratory tract disease	9/216	126/8007	0.00689344	0.0282797	0.0181843	VCAM1/HMOX1/CXCL8/CCL5/ADIPOQ/TAC1/TLR2/CD14/ITK	9
		DOID:3193	peripheral nerve sheath neoplasm	4/216	29/8007	0.00720451	0.0293789	0.0188911	TNC/KIT/MMP13/SOX9	4
		DOID:5353	colonic disease	4/216	30/8007	0.0081405	0.0329981	0.0212183	S100A8/KIT/AQP9/TAC1	4
		DOID:5517	stomach carcinoma	10/216	153/8007	0.00829861	0.03344	0.0215025	CXCL12/SPP1/MMP9/S100A8/HMOX1/KLF4/CEMIP/CXCL8/CCL4/IGFBP2	10
		DOID:9455	lipid storage disease	9/216	130/8007	0.00840636	0.0336749	0.0216535	LUM/VCAM1/HMOX1/CCL18/KRT18/SERPINA1/TNFRSF11B/ADIPOQ/PLIN1	9
		DOID:750	peptic ulcer disease	6/216	66/8007	0.00849448	0.0338289	0.0217526	TREM1/MMP9/PLAU/GZMB/CXCL8/TLR2	6
		DOID:3910	lung adenocarcinoma	11/216	178/8007	0.00864299	0.0342202	0.0220042	LUM/CXCL12/S100A9/MMP9/S100A8/HMOX1/CXCL8/CCL5/CXCR4/CCR5/SOX9	11
		DOID:9744	type 1 diabetes mellitus	4/216	31/8007	0.00915285	0.0360294	0.0231675	VWF/MMP9/CXCL8/TLR2	4
		DOID:576	proteinuria	6/216	68/8007	0.00978979	0.0383152	0.0246373	COL4A4/PLAU/CHI3L1/HMOX1/ADIPOQ/HPSE	6
		DOID:1969	cerebral palsy	3/216	17/8007	0.00995459	0.0387376	0.0249089	CXCL8/PLP1/F5	3
		DOID:10283	prostate cancer	20/216	425/8007	0.0106193	0.0410895	0.0264213	CXCL16/CXCL12/PLAUR/S100A9/MMP12/SPP1/MMP9/WIF1/MAOA/IBSP/S100A8/PLAU/ID1/MMP1/SDC1/CXCL8/IGFBP4/CCL5/IGFBP2/BCL2A1	20
		DOID:3277	thymus cancer	4/216	33/8007	0.0114157	0.0439216	0.0282423	MMP9/KIT/CXCL13/VNN2	4
		DOID:2730	epidermolysis bullosa	3/216	18/8007	0.0117114	0.0448061	0.0288111	MMP1/KRT18/KRT14	3
		DOID:3146	lipid metabolism disorder	7/216	92/8007	0.0119006	0.0452753	0.0291128	FN1/PLAUR/MMP9/CXCL8/CCL5/ADIPOQ/CCR5	7
		DOID:3326	purpura	6/216	71/8007	0.011988	0.0453545	0.0291637	VWF/MMP9/HMOX1/CXCR4/FGF2/TLR2	6
		DOID:1793	pancreatic cancer	16/216	319/8007	0.0123294	0.0463884	0.0298285	CXCL16/LUM/CXCL12/PLAUR/MMP9/PLAU/KIT/ID1/SDC1/CXCL8/NDRG2/TFPI2/CXCR4/CCR5/SYK/FAP	16
		DOID:1781	thyroid cancer	12/216	213/8007	0.0125089	0.0468055	0.0300967	FN1/PLAUR/TNC/SPP1/CTSB/MMP9/PLAU/KIT/ID1/SERPINA1/ENPP2/CXCR4	12
		DOID:13250	diarrhea	4/216	34/8007	0.0126705	0.047151	0.0303189	S100A8/CXCL8/TNFRSF11B/TAC1	4
		DOID:3856	male reproductive organ cancer	20/216	435/8007	0.0134607	0.0493913	0.0317595	CXCL16/CXCL12/PLAUR/S100A9/MMP12/SPP1/MMP9/WIF1/MAOA/IBSP/S100A8/PLAU/ID1/MMP1/SDC1/CXCL8/IGFBP4/CCL5/IGFBP2/BCL2A1	20
		DOID:0060049	autoimmune disease of urogenital tract	6/216	73/8007	0.0136336	0.0493913	0.0317595	FN1/KRT18/TNFRSF11B/IL7R/CD27/TLR2	6
		DOID:12236	primary biliary cirrhosis	6/216	73/8007	0.0136336	0.0493913	0.0317595	FN1/KRT18/TNFRSF11B/IL7R/CD27/TLR2	6
		DOID:214	teeth hard tissue disease	3/216	19/8007	0.0136352	0.0493913	0.0317595	FAM20A/TNFRSF11B/LYZ	3
		DOID:3407	carotid artery disease	3/216	19/8007	0.0136352	0.0493913	0.0317595	SPP1/MMP9/TNFRSF11B	3
GO:Gene Ontology; KEGG: Kyoto Encyclopedia of Genes and Genomes; DO:Disease Ontology;CC:Cellular Component; BP:Biological Process; MF:Molecular Function;
